# Supplementary material
Source: publisher figshare collection journal article supplement (https://gsajournals.figshare.com/articles/dataset/_/6149399)
Supplement: Supplementary file 1 [file 1]

**Table S2. No effects of Chr Y origin and *Prdm9* alleles on hybrid sterility phenotypes.** Analysis of variance testing for effects of Chr Y origin (*musculus*<sup>PWK</sup> or *musculus*<sup>CZII</sup>) and *Prdm9* alleles on hybrid sterility phenotypes. *F* = ANOVA *F* statistic, \* indicates test is not significant following FDR correction. <sup>1</sup> Square-root transformed sperm count (1x10<sup>6</sup>).

|                                         | Chr Y    |                 | Sterility QTL |               | Chr Y*QTL |                 | <i>Prdm9</i> |                 | <i>Prdm9</i> *QTL |                 | Chr Y* <i>Prdm9</i> |                 |
|-----------------------------------------|----------|-----------------|---------------|---------------|-----------|-----------------|--------------|-----------------|-------------------|-----------------|---------------------|-----------------|
|                                         | <i>F</i> | <i>P</i> -value | Chr           | Position (bp) | <i>F</i>  | <i>P</i> -value | <i>F</i>     | <i>P</i> -value | <i>F</i>          | <i>P</i> -value | <i>F</i>            | <i>P</i> -value |
| Relative paired testis weight           | 0.42     | 0.521           | 9             | 75297519      | 0.05      | 0.822           | 0.01         | 0.908           | 2.91              | 0.090           | 2.64                | 0.106           |
|                                         |          |                 | 15            | 82225162      | 0.05      | 0.826           |              |                 | 0.16              | 0.686           |                     |                 |
| Proportion motile sperm                 | 2.59     | 0.110           | 9             | 75297519      | 0.71      | 0.401           | 2.84         | 0.095           | 0.42              | 0.518           | 1.96                | 0.164           |
| <sup>1</sup> Normalized sperm count     | 0.05     | 0.833           | 4             | 57855275      | 1.48      | 0.225           | 0.01         | 0.945           | 2.53              | 0.114           | 1.87                | 0.174           |
|                                         |          |                 | 9             | 75297519      | 2.84      | 0.094           |              |                 | 1.99              | 0.160           |                     |                 |
| Sperm head morphology index             | 1.74     | 0.189           | 4             | 144910410     | 0.17      | 0.678           | 1.07         | 0.303           | 1.38              | 0.242           | 4.13                | *0.044          |
|                                         |          |                 | 8             | 107052731     | 0.14      | 0.708           |              |                 | 2.41              | 0.123           |                     |                 |
|                                         |          |                 | 9             | 98947296      | 1.98      | 0.161           |              |                 | 2.45              | 0.120           |                     |                 |
|                                         |          |                 | 15            | 82225162      | 0.30      | 0.588           |              |                 | 0.18              | 0.672           |                     |                 |
| Proportion normal sperm head attachment | 4.59     | *0.034          | 2             | 170575651     | 0.55      | 0.459           | 0.15         | 0.702           | 1.43              | 0.234           | 0.62                | 0.434           |
|                                         |          |                 | 4             | 142037926     | 0.15      | 0.700           |              |                 | 0.40              | 0.530           |                     |                 |
|                                         |          |                 | 9             | 98947296      | 4.76      | *0.031          |              |                 | 3.18              | 0.077           |                     |                 |
|                                         |          |                 | 15            | 81554698      | 2.27      | 0.134           | 0.01         | 0.908           | 2.91              | 0.090           |                     |                 |
