# Supplementary material
Source: publisher figshare collection journal article supplement (https://gsajournals.figshare.com/articles/dataset/_/6149399)
Supplement: Supplementary file 1 [file 1]

## Sheet: Sheet1
Supplemental Data S1. Microsatellite genotypes for markers inside and outside the chromosome 4 introgressed TRD region.
Sample File	Sample Name	Marker	Dye	Allele 1	Allele 2	Size 1	Size 2	Height 1	Height 2
1.1F_E08_Run_ABI3130_2015-10-01_14-06_1041.fsa	P.PP.CC1.1F	127	B	176	180	176.12	180.06	700	457
1.2F_F08_Run_ABI3130_2015-10-01_14-06_1041.fsa	P.PP.CC1.2F	127	B	176	180	176.15	180.09	709	467
1.3F_G08_Run_ABI3130_2015-10-01_14-06_1041.fsa	P.PP.CC1.3F	127	B	176	180	176.27	180.19	937	609
1.4M_H08_Run_ABI3130_2015-10-01_14-06_1041.fsa	P.PP.CC1.4M	127	B	176	176	176.33	176.33	1779	1779
1.5M_A09_Run_ABI3130_2015-10-01_14-06_1042.fsa	P.PP.CC1.5M	127	B	176	176	176.16	176.16	2171	2171
12.1F_E02_Run_ABI3130_2015-09-30_12-58_1024.fsa	P.PP.CC12.1F	127	B	176	176	176.2	176.2	1050	1050
12.2M_D02_Run_ABI3130_2015-09-30_12-58_1024.fsa	P.PP.CC12.2M	127	B	176	176	176.3	176.3	1163	1163
13.1F_D12_Run_ABI3130_2015-10-01_14-06_1043.fsa	P.PP.CC13.1F	127	B	176	180	176.15	180.12	588	364
13.2F_E12_Run_ABI3130_2015-10-01_14-06_1043.fsa	P.PP.CC13.2F	127	B	176	180	176.22	180.19	398	245
13.3F_F12_Run_ABI3130_2015-10-01_14-06_1043.fsa	P.PP.CC13.3F	127	B	176	176	176.31	176.31	791	791
14.10M_E04_Run_ABI3130_2015-10-01_14-06_1039.fsa	P.PP.CC14.10M	127	B	176	180	176.21	180.12	506	334
14.5M_H03_Run_ABI3130_2015-10-01_14-06_1039.fsa	P.PP.CC14.5M	127	B	176	180	176.18	180.13	1035	671
14.6M_A04_Run_ABI3130_2015-10-01_14-06_1039.fsa	P.PP.CC14.6M	127	B	176	176	176.1	176.1	2043	2043
14.7M_B04_Run_ABI3130_2015-10-01_14-06_1039.fsa	P.PP.CC14.7M	127	B	176	176	176.1	176.1	1526	1526
14.8M_C04_Run_ABI3130_2015-10-01_14-06_1039.fsa	P.PP.CC14.8M	127	B	176	180	176.12	180.08	1089	705
14.9M_D04_Run_ABI3130_2015-10-01_14-06_1039.fsa	P.PP.CC14.9M	127	B	176	176	176.13	176.13	1375	1375
15.1F_B05_Run_ABI3130_2015-10-01_14-06_1040.fsa	P.PP.CC15.1F	127	B	176	176	176.18	176.18	1498	1498
15.2F_C05_Run_ABI3130_2015-10-01_14-06_1040.fsa	P.PP.CC15.2F	127	B	176	176	176.09	176.09	1470	1470
15.3F_D05_Run_ABI3130_2015-10-01_14-06_1040.fsa	P.PP.CC15.3F	127	B	176	180	176.15	180.09	857	562
15.4F_E05_Run_ABI3130_2015-10-01_14-06_1040.fsa	P.PP.CC15.4F	127	B	176	176	176.12	176.12	795	795
15.5M_F05_Run_ABI3130_2015-10-01_14-06_1040.fsa	P.PP.CC15.5M	127	B	176	180	176.24	180.17	932	613
15.6M_G05_Run_ABI3130_2015-10-01_14-06_1040.fsa	P.PP.CC15.6M	127	B	176	180	176.23	180.18	1005	664
15.7M_H05_Run_ABI3130_2015-10-01_14-06_1040.fsa	P.PP.CC15.7M	127	B	176	176	176.24	176.24	1301	1301
16.1F_A01_Run_ABI3130_2015-09-30_12-58_1024.fsa	P.PP.CC16.1F	127	B	176	180	176.2	180.16	298	197
16.2F_D01_Run_ABI3130_2015-09-30_12-58_1024.fsa	P.PP.CC16.2F	127	B	176	176	176.27	176.27	721	721
16.3F_E01_Run_ABI3130_2015-09-30_12-58_1024.fsa	P.PP.CC16.3F	127	B	176	176	176.24	176.24	647	647
16.4M_F01_Run_ABI3130_2015-09-30_12-58_1024.fsa	P.PP.CC16.4M	127	B	176	176	176.23	176.23	908	908
16.5M_G01_Run_ABI3130_2015-09-30_12-58_1024.fsa	P.PP.CC16.5M	127	B	176	176	176.15	176.15	1046	1046
16.6M_H01_Run_ABI3130_2015-09-30_12-58_1024.fsa	P.PP.CC16.6M	127	B	176	180	176.31	180.27	242	172
17.1F_A06_Run_ABI3130_2015-10-01_14-06_1040.fsa	P.PP.CC17.1F	127	B	176	176	176.15	176.15	874	874
17.2F_A05_Run_ABI3130_2015-10-01_14-06_1040.fsa	P.PP.CC17.2F	127	B	176	180	176.18	180.11	1486	992
17.3F_B01_Run_ABI3130_2015-09-30_12-58_1024.fsa	P.PP.CC17.3F	127	B	176	180	176.26	180.14	1183	776
17.4F_C01_Run_ABI3130_2015-09-30_12-58_1024.fsa	P.PP.CC17.4F	127	B	176	180	176.26	180.14	452	327
17.5M_A02_Run_ABI3130_2015-09-30_12-58_1024.fsa	P.PP.CC17.5M	127	B	176	180	176.18	180.13	667	421
17.6M_B02_Run_ABI3130_2015-09-30_12-58_1024.fsa	P.PP.CC17.6M	127	B	176	180	176.18	180.13	1054	726
17.7M_C02_Run_ABI3130_2015-09-30_12-58_1024.fsa	P.PP.CC17.7M	127	B	176	176	176.23	176.23	799	799
19.1F_D08_Run_ABI3130_2015-09-30_12-58_1027.fsa	P.PP.CC19.1F	127	B	176	180	176.24	180.17	815	562
19.2F_E08_Run_ABI3130_2015-09-30_12-58_1027.fsa	P.PP.CC19.2F	127	B	176	176	176.14	176.14	1239	1239
19.3F_F08_Run_ABI3130_2015-09-30_12-58_1027.fsa	P.PP.CC19.3F	127	B	176	176	176.23	176.23	1031	1031
19.4F_G08_Run_ABI3130_2015-09-30_12-58_1027.fsa	P.PP.CC19.4F	127	B	176	180	176.2	180.15	768	518
19.5F_H08_Run_ABI3130_2015-09-30_12-58_1027.fsa	P.PP.CC19.5F	127	B	176	180	176.32	180.25	1036	680
19.6M_A09_Run_ABI3130_2015-09-30_12-58_1028.fsa	P.PP.CC19.6M	127	B	176	176	176.09	176.09	2037	2037
19.7M_B09_Run_ABI3130_2015-09-30_12-58_1028.fsa	P.PP.CC19.7M	127	B	176	176	176.12	176.12	1509	1509
19.8M_C09_Run_ABI3130_2015-09-30_12-58_1028.fsa	P.PP.CC19.8M	127	B	176	176	176.21	176.21	1555	1555
2.1F_B09_Run_ABI3130_2015-10-01_14-06_1042.fsa	P.PP.CC2.1F	127	B	176	176	176.1	176.1	1227	1227
2.2F_C09_Run_ABI3130_2015-10-01_14-06_1042.fsa	P.PP.CC2.2F	127	B	176	180	176.24	180.16	1070	717
2.3F_D09_Run_ABI3130_2015-10-01_14-06_1042.fsa	P.PP.CC2.3F	127	B	176	180	176.21	180.13	380	254
2.4F_E09_Run_ABI3130_2015-10-01_14-06_1042.fsa	P.PP.CC2.4F	127	B	176	176	176.12	176.12	1201	1201
2.5M_F09_Run_ABI3130_2015-10-01_14-06_1042.fsa	P.PP.CC2.5M	127	B	176	176	176.24	176.24	1574	1574
20.10M_C08_Run_ABI3130_2015-09-30_12-58_1027.fsa	P.PP.CC20.10M	127	B	176	180	176.17	180.12	928	633
20.1F_B07_Run_ABI3130_2015-09-30_12-58_1027.fsa	P.PP.CC20.1F	127	B	176	176	176.11	176.11	530	530
20.2F_C07_Run_ABI3130_2015-09-30_12-58_1027.fsa	P.PP.CC20.2F	127	B	176	180	176.14	180.1	1197	802
20.3F_D07_Run_ABI3130_2015-09-30_12-58_1027.fsa	P.PP.CC20.3F	127	B	176	180	176.24	180.19	801	555
20.4F_E07_Run_ABI3130_2015-09-30_12-58_1027.fsa	P.PP.CC20.4F	127	B	176	180	176.26	180.12	939	624
20.5F_F07_Run_ABI3130_2015-09-30_12-58_1027.fsa	P.PP.CC20.5F	127	B	176	176	176.11	176.11	1549	1549
20.6F_G07_Run_ABI3130_2015-09-30_12-58_1027.fsa	P.PP.CC20.6F	127	B	176	176	176.17	176.17	1339	1339
20.7F_H07_Run_ABI3130_2015-09-30_12-58_1027.fsa	P.PP.CC20.7F	127	B	176	180	176.31	180.18	617	432
20.8M_A08_Run_ABI3130_2015-09-30_12-58_1027.fsa	P.PP.CC20.8M	127	B	176	176	176.1	176.1	2127	2127
20.9M_B08_Run_ABI3130_2015-09-30_12-58_1027.fsa	P.PP.CC20.9M	127	B	176	176	176.21	176.21	1044	1044
21.1F_A04_Run_ABI3130_2015-09-30_12-58_1025.fsa	P.PP.CC21.1F	127	B	176	176	176.12	176.12	1862	1862
21.2F_B04_Run_ABI3130_2015-09-30_12-58_1025.fsa	P.PP.CC21.2F	127	B	176	176	176.06	176.06	1633	1633
21.3M_C04_Run_ABI3130_2015-09-30_12-58_1025.fsa	P.PP.CC21.3M	127	B	176	176	176.14	176.14	2041	2041
21.4M_D04_Run_ABI3130_2015-09-30_12-58_1025.fsa	P.PP.CC21.4M	127	B	176	180	176.15	180.11	929	611
21.5M_E04_Run_ABI3130_2015-09-30_12-58_1025.fsa	P.PP.CC21.5M	127	B	176	176	176.05	176.05	1756	1756
22.10M_A07_Run_ABI3130_2015-09-30_12-58_1027.fsa	P.PP.CC22.10M	127	B	176	176	176.15	176.15	2051	2051
22.1F_H05_Run_ABI3130_2015-09-30_12-58_1026.fsa	P.PP.CC22.1F	127	B	176	180	176.14	180.12	707	489
22.2F_A06_Run_ABI3130_2015-09-30_12-58_1026.fsa	P.PP.CC22.2F	127	B	176	180	176.09	180.04	1021	705
22.3F_B06_Run_ABI3130_2015-09-30_12-58_1026.fsa	P.PP.CC22.3F	127	B	176	180	176.12	180.08	932	645
22.4F_C06_Run_ABI3130_2015-09-30_12-58_1026.fsa	P.PP.CC22.4F	127	B	176	176	176.14	176.14	1536	1536
22.5M_D06_Run_ABI3130_2015-09-30_12-58_1026.fsa	P.PP.CC22.5M	127	B	176	180	176.12	180.08	526	369
22.6M_E06_Run_ABI3130_2015-09-30_12-58_1026.fsa	P.PP.CC22.6M	127	B	176	176	176.21	176.21	556	556
22.7M_F06_Run_ABI3130_2015-09-30_12-58_1026.fsa	P.PP.CC22.7M	127	B	176	180	176.23	180.13	828	571
22.8M_G06_Run_ABI3130_2015-09-30_12-58_1026.fsa	P.PP.CC22.8M	127	B	176	180	176.26	180.14	819	547
22.9M_H06_Run_ABI3130_2015-09-30_12-58_1026.fsa	P.PP.CC22.9M	127	B	176	176	176.2	176.2	1674	1674
23.1M_E03_Run_ABI3130_2015-09-30_12-58_1025.fsa	P.PP.CC23.1M	127	B	176	180	176.3	180.18	963	662
23.2M_F03_Run_ABI3130_2015-09-30_12-58_1025.fsa	P.PP.CC23.2M	127	B	176	180	176.14	180.12	1138	775
23.3M_G03_Run_ABI3130_2015-09-30_12-58_1025.fsa	P.PP.CC23.3M	127	B	176	180	176.21	180.18	1050	716
23.4M_H03_Run_ABI3130_2015-09-30_12-58_1025.fsa	P.PP.CC23.4M	127	B	176	176	176.22	176.22	629	629
26.1F_D09_Run_ABI3130_2015-09-30_12-58_1028.fsa	P.PP.CC26.1F	127	B	176	180	176.18	180.12	750	498
26.2F_E09_Run_ABI3130_2015-09-30_12-58_1028.fsa	P.PP.CC26.2F	127	B	176	176	176.11	176.11	1367	1367
26.3F_F09_Run_ABI3130_2015-09-30_12-58_1028.fsa	P.PP.CC26.3F	127	B	176	180	176.23	180.18	881	585
26.4M_G09_Run_ABI3130_2015-09-30_12-58_1028.fsa	P.PP.CC26.4M	127	B	176	180	176.17	180.12	1064	708
30.1F_A11_Run_ABI3130_2015-09-30_12-58_1029.fsa	P.PP.CC30.1F	127	B	176	180	176.18	180.12	1359	935
30.2F_B11_Run_ABI3130_2015-09-30_12-58_1029.fsa	P.PP.CC30.2F	127	B	176	176	176.09	176.09	1211	1211
30.3F_C11_Run_ABI3130_2015-09-30_12-58_1029.fsa	P.PP.CC30.3F	127	B	176	176	176.09	176.09	1116	1116
30.4F_D11_Run_ABI3130_2015-09-30_12-58_1029.fsa	P.PP.CC30.4F	127	B	176	176	176.18	176.18	1451	1451
30.5F_E11_Run_ABI3130_2015-09-30_12-58_1029.fsa	P.PP.CC30.5F	127	B	176	180	176.26	180.2	717	477
30.6M_F11_Run_ABI3130_2015-09-30_12-58_1029.fsa	P.PP.CC30.6M	127	B	176	180	176.21	180.15	602	393
30.7M_G11_Run_ABI3130_2015-09-30_12-58_1029.fsa	P.PP.CC30.7M	127	B	176	180	176.32	180.25	772	481
30.8M_H11_Run_ABI3130_2015-09-30_12-58_1029.fsa	P.PP.CC30.8M	127	B	176	180	176.29	180.23	927	624
30.9M_A12_Run_ABI3130_2015-09-30_12-58_1029.fsa	P.PP.CC30.9M	127	B	176	176	176.1	176.1	1663	1663
32.10M_G05_Run_ABI3130_2015-09-30_12-58_1026.fsa	P.PP.CC32.10M	127	B	176	176	176.15	176.15	876	876
32.1BF_B10_Run_ABI3130_2015-09-30_12-58_1028.fsa	P.PP.CC32.1BF	127	B	176	180	176.16	180.17	857	568
32.1F_F04_Run_ABI3130_2015-09-30_12-58_1025.fsa	P.PP.CC32.1F	127	B	176	176	176.26	176.26	1151	1151
32.2BF_C10_Run_ABI3130_2015-09-30_12-58_1028.fsa	P.PP.CC32.2BF	127	B	176	180	176.06	180	1099	752
32.2F_G04_Run_ABI3130_2015-09-30_12-58_1025.fsa	P.PP.CC32.2F	127	B	176	176	176.12	176.12	1115	1115
32.3BF_D10_Run_ABI3130_2015-09-30_12-58_1028.fsa	P.PP.CC32.3BF	127	B	176	180	176.15	180.09	582	403
32.3F_H04_Run_ABI3130_2015-09-30_12-58_1025.fsa	P.PP.CC32.3F	127	B	176	180	176.26	180.22	1170	792
32.4BM_E10_Run_ABI3130_2015-09-30_12-58_1028.fsa	P.PP.CC32.4BM	127	B	176	180	176.12	180.07	647	420
32.4F_A05_Run_ABI3130_2015-09-30_12-58_1026.fsa	P.PP.CC32.4F	127	B	176	176	176.12	176.12	1871	1871
32.5BM_F10_Run_ABI3130_2015-09-30_12-58_1028.fsa	P.PP.CC32.5BM	127	B	176	176	176.11	176.11	1132	1132
32.5F_B05_Run_ABI3130_2015-09-30_12-58_1026.fsa	P.PP.CC32.5F	127	B	176	176	176.12	176.12	1480	1480
32.6BM_G10_Run_ABI3130_2015-09-30_12-58_1028.fsa	P.PP.CC32.6BM	127	B	176	180	176.17	180.12	628	432
32.6M_C05_Run_ABI3130_2015-09-30_12-58_1026.fsa	P.PP.CC32.6M	127	B	176	176	176.15	176.15	1342	1342
32.7BM_H10_Run_ABI3130_2015-09-30_12-58_1028.fsa	P.PP.CC32.7BM	127	B	176	180	176.34	180.26	1040	709
32.7M_D05_Run_ABI3130_2015-09-30_12-58_1026.fsa	P.PP.CC32.7M	127	B	176	180	176.22	180.18	671	457
32.8M_E05_Run_ABI3130_2015-09-30_12-58_1026.fsa	P.PP.CC32.8M	127	B	176	180	176.14	180.11	795	532
32.9M_F05_Run_ABI3130_2015-09-30_12-58_1026.fsa	P.PP.CC32.9M	127	B	176	180	176.2	180.17	902	608
33.1M_H09_Run_ABI3130_2015-09-30_12-58_1028.fsa	P.PP.CC33.1M	127	B	176	176	176.2	176.2	1235	1235
33.2M_A10_Run_ABI3130_2015-09-30_12-58_1028.fsa	P.PP.CC33.2M	127	B	176	180	176.16	180.17	1015	668
34.1F_B12_Run_ABI3130_2015-09-30_12-58_1029.fsa	P.PP.CC34.1F	127	B	176	176	176.1	176.1	842	842
34.2F_C12_Run_ABI3130_2015-09-30_12-58_1029.fsa	P.PP.CC34.2F	127	B	176	176	176.23	176.23	1292	1292
34.3F_D12_Run_ABI3130_2015-09-30_12-58_1029.fsa	P.PP.CC34.3F	127	B	176	180	176.17	180.1	754	468
34.4F_E12_Run_ABI3130_2015-09-30_12-58_1029.fsa	P.PP.CC34.4F	127	B	176	180	176.17	180.12	616	399
35.1F_C02_Run_ABI3130_2015-09-30_13-03_1030.fsa	P.PP.CC35.1F	127	B	176	180	176.26	180.18	580	376
35.2F_E02_Run_ABI3130_2015-09-30_13-03_1030.fsa	P.PP.CC35.2F	127	B	176	176	176.14	176.14	881	881
35.3F_D02_Run_ABI3130_2015-09-30_13-03_1030.fsa	P.PP.CC35.3F	127	B	176	176	176.12	176.12	611	611
35.4F_F02_Run_ABI3130_2015-09-30_13-03_1030.fsa	P.PP.CC35.4F	127	B	176	176	176.23	176.23	833	833
35.5F_G01_Run_ABI3130_2015-09-30_13-03_1030.fsa	P.PP.CC35.5F	127	B	176	180	176.14	180.1	544	357
35.6F_F01_Run_ABI3130_2015-09-30_13-03_1030.fsa	P.PP.CC35.6F	127	B
35.7F_A02_Run_ABI3130_2015-09-30_13-03_1030.fsa	P.PP.CC35.7F	127	B	176	176	176.18	176.18	1165	1165
35.8M_B02_Run_ABI3130_2015-09-30_13-03_1030.fsa	P.PP.CC35.8M	127	B	176	180	176.09	180.04	755	496
35.9M_H01_Run_ABI3130_2015-09-30_13-03_1030.fsa	P.PP.CC35.9M	127	B	176	176	176.23	176.23	900	900
36.1F_F12_Run_ABI3130_2015-09-30_12-58_1029.fsa	P.PP.CC36.1F	127	B	176	180	176.21	180.16	667	464
36.2F_A01_Run_ABI3130_2015-09-30_13-03_1030.fsa	P.PP.CC36.2F	127	B	176	180	176.21	180.14	2130	1346
36.3M_B01_Run_ABI3130_2015-09-30_13-03_1030.fsa	P.PP.CC36.3M	127	B	176	176	176.12	176.12	995	995
36.4M_C01_Run_ABI3130_2015-09-30_13-03_1030.fsa	P.PP.CC36.4M	127	B	176	180	176.08	180.05	788	491
36.5M_D01_Run_ABI3130_2015-09-30_13-03_1030.fsa	P.PP.CC36.5M	127	B	176	180	176.15	180.11	641	406
36.6M_E01_Run_ABI3130_2015-09-30_13-03_1030.fsa	P.PP.CC36.6M	127	B	176	176	176.2	176.2	743	743
36.7M_G02_Run_ABI3130_2015-09-30_13-03_1030.fsa	P.PP.CC36.7M	127	B	176	180	176.26	180.2	808	510
36.8M_H02_Run_ABI3130_2015-09-30_13-03_1030.fsa	P.PP.CC36.8M	127	B	176	180	176.35	180.35	535	349
37.1F_A03_Run_ABI3130_2015-09-30_18-42_1031.fsa	P.PP.CC37.1F	127	B	176	176	176.06	176.06	2465	2465
37.2F_C03_Run_ABI3130_2015-09-30_18-42_1031.fsa	P.PP.CC37.2F	127	B	176	180	176.15	180.08	686	408
37.3F_B03_Run_ABI3130_2015-09-30_18-42_1031.fsa	P.PP.CC37.3F	127	B	176	176	176.12	176.12	1059	1059
37.4M_D03_Run_ABI3130_2015-09-30_18-42_1031.fsa	P.PP.CC37.4M	127	B	176	176	176.21	176.21	1475	1475
37.5M_E03_Run_ABI3130_2015-09-30_18-42_1031.fsa	P.PP.CC37.5M	127	B	176	176	176.15	176.15	1110	1110
39.1F_E05_Run_ABI3130_2015-09-30_18-42_1032.fsa	P.PP.CC39.1F	127	B	176	176	176.23	176.23	1397	1397
39.2M_F05_Run_ABI3130_2015-09-30_18-42_1032.fsa	P.PP.CC39.2M	127	B	176	180	176.14	180.12	1099	719
39.3M_G05_Run_ABI3130_2015-09-30_18-42_1032.fsa	P.PP.CC39.3M	127	B	176	180	176.21	180.19	1252	814
39.4M_H05_Run_ABI3130_2015-09-30_18-42_1032.fsa	P.PP.CC39.4M	127	B	176	176	176.2	176.2	952	952
4.1F_G09_Run_ABI3130_2015-10-01_14-06_1042.fsa	P.PP.CC4.1F	127	B	176	176	176.25	176.25	657	657
4.2F_H09_Run_ABI3130_2015-10-01_14-06_1042.fsa	P.PP.CC4.2F	127	B	176	180	176.3	180.2	855	559
4.3F_A10_Run_ABI3130_2015-10-01_14-06_1042.fsa	P.PP.CC4.3F	127	B	176	176	176.1	176.1	1108	1108
4.4F_B10_Run_ABI3130_2015-10-01_14-06_1042.fsa	P.PP.CC4.4F	127	B	176	180	176.19	180.18	650	438
4.5M_C10_Run_ABI3130_2015-10-01_14-06_1042.fsa	P.PP.CC4.5M	127	B	176	180	176.18	180.17	655	439
4.6M_D10_Run_ABI3130_2015-10-01_14-06_1042.fsa	P.PP.CC4.6M	127	B	176	180	176.24	180.14	628	409
4.7M_E10_Run_ABI3130_2015-10-01_14-06_1042.fsa	P.PP.CC4.7M	127	B	176	180	176.18	180.09	319	201
41.10M_B08_Run_ABI3130_2015-10-01_08-58_1034.fsa	P.PP.CC41.10M	127	B	176	176	176.32	176.32	1036	1036
41.11M_C08_Run_ABI3130_2015-10-01_08-58_1034.fsa	P.PP.CC41.11M	127	B	176	180	176.32	180.25	763	470
41.1F_D08_Run_ABI3130_2015-10-01_08-58_1034.fsa	P.PP.CC41.1F	127	B	176	180	176.26	180.19	641	394
41.2F_E08_Run_ABI3130_2015-10-01_08-58_1034.fsa	P.PP.CC41.2F	127	B	176	176	176.35	176.35	912	912
41.3F_F08_Run_ABI3130_2015-10-01_08-58_1034.fsa	P.PP.CC41.3F	127	B	176	180	176.4	180.35	457	282
41.4F_G08_Run_ABI3130_2015-10-01_08-58_1034.fsa	P.PP.CC41.4F	127	B	176	176	176.34	176.34	640	640
41.5F_H08_Run_ABI3130_2015-10-01_08-58_1034.fsa	P.PP.CC41.5F	127	B	176	180	176.52	180.43	746	491
41.6F_A09_Run_ABI3130_2015-10-01_10-01_1036.fsa	P.PP.CC41.6F	127	B	176	180	176.26	180.17	1468	948
41.7F_G07_Run_ABI3130_2015-10-01_08-58_1034.fsa	P.PP.CC41.7F	127	B	176	180	176.29	180.22	389	243
41.8F_H07_Run_ABI3130_2015-10-01_08-58_1034.fsa	P.PP.CC41.8F	127	B	176	180	176.34	180.29	825	564
41.9M_A08_Run_ABI3130_2015-10-01_08-58_1034.fsa	P.PP.CC41.9M	127	B	176	176	176.26	176.26	896	896
42.10M_C05_Run_ABI3130_2015-09-30_18-42_1032.fsa	P.PP.CC42.10M	127	B	176	176	176.08	176.08	790	790
42.1F_C04_Run_ABI3130_2015-09-30_18-42_1031.fsa	P.PP.CC42.1F	127	B	176	180	176.09	180.06	1119	716
42.2F_D04_Run_ABI3130_2015-09-30_18-42_1031.fsa	P.PP.CC42.2F	127	B	176	180	176.3	180.18	585	379
42.3F_E04_Run_ABI3130_2015-09-30_18-42_1031.fsa	P.PP.CC42.3F	127	B	176	176	176.2	176.2	1354	1354
42.4F_H04_Run_ABI3130_2015-09-30_18-42_1031.fsa	P.PP.CC42.4F	127	B	176	176	176.29	176.29	1531	1531
42.5F_A05_Run_ABI3130_2015-09-30_18-42_1032.fsa	P.PP.CC42.5F	127	B	176	180	176.12	180.11	1844	1160
42.6F_B05_Run_ABI3130_2015-09-30_18-42_1032.fsa	P.PP.CC42.6F	127	B	176	176	176.21	176.21	1089	1089
42.7M_F04_Run_ABI3130_2015-09-30_18-42_1031.fsa	P.PP.CC42.7M	127	B	176	176	176.24	176.24	1208	1208
42.8M_G04_Run_ABI3130_2015-09-30_18-42_1031.fsa	P.PP.CC42.8M	127	B	176	180	176.2	180.17	657	413
42.9M_D05_Run_ABI3130_2015-09-30_18-42_1032.fsa	P.PP.CC42.9M	127	B	176	180	176.17	180.16	1247	790
43.10M_C10_Run_ABI3130_2015-10-01_10-01_1036.fsa	P.PP.CC43.10M	127	B	176	180	176.19	180.19	743	480
43.1F_B09_Run_ABI3130_2015-10-01_10-01_1036.fsa	P.PP.CC43.1F	127	B	176	180	176.25	180.17	1029	665
43.2F_C09_Run_ABI3130_2015-10-01_10-01_1036.fsa	P.PP.CC43.2F	127	B	176	176	176.14	176.14	1271	1271
43.3F_E09_Run_ABI3130_2015-10-01_10-01_1036.fsa	P.PP.CC43.3F	127	B	176	180	176.22	180.14	738	465
43.4F_D09_Run_ABI3130_2015-10-01_10-01_1036.fsa	P.PP.CC43.4F	127	B	176	176	176.29	176.29	911	911
43.5M_F09_Run_ABI3130_2015-10-01_10-01_1036.fsa	P.PP.CC43.5M	127	B	176	180	176.22	180.22	817	525
43.6M_G09_Run_ABI3130_2015-10-01_10-01_1036.fsa	P.PP.CC43.6M	127	B	176	176	176.25	176.25	1383	1383
43.7M_H09_Run_ABI3130_2015-10-01_10-01_1036.fsa	P.PP.CC43.7M	127	B	176	180	176.34	180.23	791	501
43.8M_A10_Run_ABI3130_2015-10-01_10-01_1036.fsa	P.PP.CC43.8M	127	B	176	176	176.06	176.06	718	718
43.9M_B10_Run_ABI3130_2015-10-01_10-01_1036.fsa	P.PP.CC43.9M	127	B	176	180	176.2	180.11	858	560
44.1F_A06_Run_ABI3130_2015-09-30_18-42_1032.fsa	P.PP.CC44.1F	127	B	176	180	176.17	180.08	1522	1055
44.2F_B06_Run_ABI3130_2015-09-30_18-42_1032.fsa	P.PP.CC44.2F	127	B	176	180	176.2	180.12	1162	774
44.3M_C06_Run_ABI3130_2015-09-30_18-42_1032.fsa	P.PP.CC44.3M	127	B	176	180	176.23	180.13	1141	783
45.1F_E10_Run_ABI3130_2015-10-01_10-01_1036.fsa	P.PP.CC45.1F	127	B	176	180	176.23	180.22	655	435
45.2F_D10_Run_ABI3130_2015-10-01_10-01_1036.fsa	P.PP.CC45.2F	127	B	176	176	176.24	176.24	1090	1090
45.3M_F10_Run_ABI3130_2015-10-01_10-01_1036.fsa	P.PP.CC45.3M	127	B	176	176	176.19	176.19	844	844
46.10F_E07_Run_ABI3130_2015-10-01_08-58_1034.fsa	P.PP.CC46.10F	127	B	176	180	176.26	180.19	563	351
46.11M_F07_Run_ABI3130_2015-10-01_08-58_1034.fsa	P.PP.CC46.11M	127	B	176	180	176.31	180.25	825	532
46.1F_D06_Run_ABI3130_2015-09-30_18-42_1032.fsa	P.PP.CC46.1F	127	B	176	180	176.26	180.14	646	398
46.2F_E06_Run_ABI3130_2015-09-30_18-42_1032.fsa	P.PP.CC46.2F	127	B	176	176	176.17	176.17	847	847
46.3M_F06_Run_ABI3130_2015-09-30_18-42_1032.fsa	P.PP.CC46.3M	127	B	176	180	176.26	180.18	804	516
46.4M_G06_Run_ABI3130_2015-09-30_18-42_1032.fsa	P.PP.CC46.4M	127	B	176	176	176.15	176.15	1298	1298
46.5M_H06_Run_ABI3130_2015-09-30_18-42_1032.fsa	P.PP.CC46.5M	127	B	176	176	176.32	176.32	1404	1404
46.6M_A07_Run_ABI3130_2015-10-01_08-58_1034.fsa	P.PP.CC46.6M	127	B	176	176	176.26	176.26	1959	1959
46.7F_B07_Run_ABI3130_2015-10-01_08-58_1034.fsa	P.PP.CC46.7F	127	B	176	176	176.21	176.21	1266	1266
46.8F_C07_Run_ABI3130_2015-10-01_08-58_1034.fsa	P.PP.CC46.8F	127	B	176	180	176.32	180.28	748	484
46.9M_D07_Run_ABI3130_2015-10-01_08-58_1034.fsa	P.PP.CC46.9M	127	B	176	176	176.2	176.2	1043	1043
47.1F_F03_Run_ABI3130_2015-09-30_18-42_1031.fsa	P.PP.CC47.1F	127	B	176	176	176.26	176.26	1547	1547
47.1F_G10_Run_ABI3130_2015-10-01_10-01_1036.fsa	P.PP.CC47.1F	127	B	176	176	176.28	176.28	1205	1205
47.2F_G03_Run_ABI3130_2015-09-30_18-42_1031.fsa	P.PP.CC47.2F	127	B	176	176	176.23	176.23	1250	1250
47.2F_H10_Run_ABI3130_2015-10-01_10-01_1036.fsa	P.PP.CC47.2F	127	B	176	176	176.34	176.34	843	843
47.3F_A11_Run_ABI3130_2015-10-01_12-59_1037.fsa	P.PP.CC47.3F	127	B	176	176	176.17	176.17	1623	1623
47.3M_H03_Run_ABI3130_2015-09-30_18-42_1031.fsa	P.PP.CC47.3M	127	B	176	176	176.17	176.17	913	913
47.4F_B11_Run_ABI3130_2015-10-01_12-59_1037.fsa	P.PP.CC47.4F	127	B	176	180	176.19	180.12	828	543
47.4M_A04_Run_ABI3130_2015-09-30_18-42_1031.fsa	P.PP.CC47.4M	127	B	176	180	176.12	180.11	1838	1161
47.5F_C11_Run_ABI3130_2015-10-01_12-59_1037.fsa	P.PP.CC47.5F	127	B	176	180	176.22	180.16	623	404
47.5M_B04_Run_ABI3130_2015-09-30_18-42_1031.fsa	P.PP.CC47.5M	127	B	176	180	176.12	180.03	806	513
47.6M_E11_Run_ABI3130_2015-10-01_12-59_1037.fsa	P.PP.CC47.6M	127	B	176	176	176.22	176.22	828	828
47.7M_D11_Run_ABI3130_2015-10-01_12-59_1037.fsa	P.PP.CC47.7M	127	B	176	176	176.22	176.22	601	601
48.1F_F11_Run_ABI3130_2015-10-01_12-59_1037.fsa	P.PP.CC48.1F	127	B	176	176	176.25	176.25	991	991
48.2F_G11_Run_ABI3130_2015-10-01_12-59_1037.fsa	P.PP.CC48.2F	127	B	176	180	176.27	180.19	515	342
48.3F_H11_Run_ABI3130_2015-10-01_12-59_1037.fsa	P.PP.CC48.3F	127	B	176	180	176.34	180.34	376	224
48.4F_B12_Run_ABI3130_2015-10-01_12-59_1037.fsa	P.PP.CC48.4F	127	B	176	176	176.23	176.23	1037	1037
48.5M_A12_Run_ABI3130_2015-10-01_12-59_1037.fsa	P.PP.CC48.5M	127	B	176	180	176.26	180.18	661	418
48.6M_C12_Run_ABI3130_2015-10-01_12-59_1037.fsa	P.PP.CC48.6M	127	B	176	176	176.25	176.25	660	660
48.7M_D12_Run_ABI3130_2015-10-01_12-59_1037.fsa	P.PP.CC48.7M	127	B	176	180	176.28	180.19	512	318
48.8M_E12_Run_ABI3130_2015-10-01_12-59_1037.fsa	P.PP.CC48.8M	127	B	176	180	176.34	180.25	429	287
5.1F_F10_Run_ABI3130_2015-10-01_14-06_1042.fsa	P.PP.CC5.1F	127	B	176	180	176.18	180.11	742	486
5.2F_G10_Run_ABI3130_2015-10-01_14-06_1042.fsa	P.PP.CC5.2F	127	B	176	176	176.18	176.18	329	329
5.3M_H10_Run_ABI3130_2015-10-01_14-06_1042.fsa	P.PP.CC5.3M	127	B	176	176	176.27	176.27	1327	1327
5.4M_A11_Run_ABI3130_2015-10-01_14-06_1043.fsa	P.PP.CC5.4M	127	B	176	176	176.15	176.15	2755	2755
5.5M_B11_Run_ABI3130_2015-10-01_14-06_1043.fsa	P.PP.CC5.5M	127	B	176	180	176.21	180.12	821	527
5.6M_C11_Run_ABI3130_2015-10-01_14-06_1043.fsa	P.PP.CC5.6M	127	B	176	176	176.27	176.27	972	972
5.7M_D11_Run_ABI3130_2015-10-01_14-06_1043.fsa	P.PP.CC5.7M	127	B	176	180	176.13	180.11	678	473
50.1F_B08_Run_ABI3130_2015-10-01_14-06_1041.fsa	P.PP.CC50.1F	127	B	176	180	176.13	180.15	397	248
50.2F_C08_Run_ABI3130_2015-10-01_14-06_1041.fsa	P.PP.CC50.2F	127	B	176	180	176.15	180.07	474	296
50.3F_D08_Run_ABI3130_2015-10-01_14-06_1041.fsa	P.PP.CC50.3F	127	B	176	180	176.25	180.16	361	227
51.1M_D07_Run_ABI3130_2015-10-01_14-06_1041.fsa	P.PP.CC51.1M	127	B	176	180	176.18	180.11	191	116
51.2M_E07_Run_ABI3130_2015-10-01_14-06_1041.fsa	P.PP.CC51.2M	127	B	176	176	176.28	176.28	344	344
51.3M_F07_Run_ABI3130_2015-10-01_14-06_1041.fsa	P.PP.CC51.3M	127	B	176	180	176.18	180.1	265	169
51.4M_G07_Run_ABI3130_2015-10-01_14-06_1041.fsa	P.PP.CC51.4M	127	B	176	180	176.24	180.16	252	154
51.5M_H07_Run_ABI3130_2015-10-01_14-06_1041.fsa	P.PP.CC51.5M	127	B	176	176	176.27	176.27	544	544
51.6M_A08_Run_ABI3130_2015-10-01_14-06_1041.fsa	P.PP.CC51.6M	127	B	176	180	176.12	180.06	811	551
52.1F_G06_Run_ABI3130_2015-10-01_14-06_1040.fsa	P.PP.CC52.1F	127	B	176	180	176.14	180.07	565	357
52.2F_H06_Run_ABI3130_2015-10-01_14-06_1040.fsa	P.PP.CC52.2F	127	B	176	180	176.27	180.26	743	480
52.3M_A07_Run_ABI3130_2015-10-01_14-06_1041.fsa	P.PP.CC52.3M	127	B	176	176	176.16	176.16	700	700
52.4M_B07_Run_ABI3130_2015-10-01_14-06_1041.fsa	P.PP.CC52.4M	127	B	176	180	176.15	180.09	524	357
52.5M_C07_Run_ABI3130_2015-10-01_14-06_1041.fsa	P.PP.CC52.5M	127	B	176	180	176.18	180.12	703	475
54.1F_F12_Run_ABI3130_2015-10-01_12-59_1037.fsa	P.PP.CC54.1F	127	B	176	176	176.22	176.22	287	287
54.2F_B06_Run_ABI3130_2015-10-01_14-06_1040.fsa	P.PP.CC54.2F	127	B	176	176	176.18	176.18	516	516
54.3F_C06_Run_ABI3130_2015-10-01_14-06_1040.fsa	P.PP.CC54.3F	127	B	176	176	176.15	176.15	859	859
54.4M_D06_Run_ABI3130_2015-10-01_14-06_1040.fsa	P.PP.CC54.4M	127	B	176	180	176.12	180.14	323	199
54.5M_E06_Run_ABI3130_2015-10-01_14-06_1040.fsa	P.PP.CC54.5M	127	B	176	180	176.3	180.25	609	393
54.6M_F06_Run_ABI3130_2015-10-01_14-06_1040.fsa	P.PP.CC54.6M	127	B	176	176	176.18	176.18	612	612
6.1F_E11_Run_ABI3130_2015-10-01_14-06_1043.fsa	P.PP.CC6.1F	127	B	176	176	176.24	176.24	443	443
6.2F_F11_Run_ABI3130_2015-10-01_14-06_1043.fsa	P.PP.CC6.2F	127	B	176	180	176.32	180.2	441	297
6.3M_G11_Run_ABI3130_2015-10-01_14-06_1043.fsa	P.PP.CC6.3M	127	B	176	176	176.28	176.28	391	391
6.4M_H11_Run_ABI3130_2015-10-01_14-06_1043.fsa	P.PP.CC6.4M	127	B	176	176	176.24	176.24	643	643
6.5M_A12_Run_ABI3130_2015-10-01_14-06_1043.fsa	P.PP.CC6.5M	127	B	176	180	176.22	180.19	415	278
6.6M_B12_Run_ABI3130_2015-10-01_14-06_1043.fsa	P.PP.CC6.6M	127	B	176	180	176.25	180.21	438	268
6.7M_C12_Run_ABI3130_2015-10-01_14-06_1043.fsa	P.PP.CC6.7M	127	B	176	176	176.21	176.21	834	834
61.1F_A01_Run_ABI3130_2015-10-01_14-06_1038.fsa	P.PP.CC61.1F	127	B	176	180	176.2	180.12	804	525
61.2F_B01_Run_ABI3130_2015-10-01_14-06_1038.fsa	P.PP.CC61.2F	127	B	176	180	176.1	180.12	236	152
61.3F_C01_Run_ABI3130_2015-10-01_14-06_1038.fsa	P.PP.CC61.3F	127	B	176	176	176.22	176.22	370	370
61.4F_D01_Run_ABI3130_2015-10-01_14-06_1038.fsa	P.PP.CC61.4F	127	B	176	180	176.34	180.26	362	221
63.2M_E01_Run_ABI3130_2015-10-01_14-06_1038.fsa	P.PP.CC63.2M	127	B	176	180	176.31	180.22	308	195
63.3M_F01_Run_ABI3130_2015-10-01_14-06_1038.fsa	P.PP.CC63.3M	127	B	176	176	176.28	176.28	582	582
63.4M_G01_Run_ABI3130_2015-10-01_14-06_1038.fsa	P.PP.CC63.4M	127	B	176	180	176.28	180.19	355	228
65.1F_E03_Run_ABI3130_2015-10-01_14-06_1039.fsa	P.PP.CC65.1F	127	B	176	176	176.18	176.18	1176	1176
65.2F_F03_Run_ABI3130_2015-10-01_14-06_1039.fsa	P.PP.CC65.2F	127	B	176	180	176.18	180.17	674	455
65.3F_G03_Run_ABI3130_2015-10-01_14-06_1039.fsa	P.PP.CC65.3F	127	B	176	176	176.21	176.21	959	959
66.1F_H01_Run_ABI3130_2015-10-01_14-06_1038.fsa	P.PP.CC66.1F	127	B	176	176	176.27	176.27	967	967
66.2F_A02_Run_ABI3130_2015-10-01_14-06_1038.fsa	P.PP.CC66.2F	127	B	176	180	176.26	180.17	755	501
66.3F_B02_Run_ABI3130_2015-10-01_14-06_1038.fsa	P.PP.CC66.3F	127	B	176	176	176.23	176.23	866	866
66.4M_C02_Run_ABI3130_2015-10-01_14-06_1038.fsa	P.PP.CC66.4M	127	B	176	176	176.25	176.25	1263	1263
66.5M_D02_Run_ABI3130_2015-10-01_14-06_1038.fsa	P.PP.CC66.5M	127	B	176	180	176.19	180.1	652	421
67.1F_E02_Run_ABI3130_2015-10-01_14-06_1038.fsa	P.PP.CC67.1F	127	B	176	180	176.25	180.17	716	481
67.2F_F02_Run_ABI3130_2015-10-01_14-06_1038.fsa	P.PP.CC67.2F	127	B	176	180	176.28	180.12	601	382
67.3F_G02_Run_ABI3130_2015-10-01_14-06_1038.fsa	P.PP.CC67.3F	127	B	176	180	176.3	180.22	528	328
67.4F_H02_Run_ABI3130_2015-10-01_14-06_1038.fsa	P.PP.CC67.4F	127	B	176	180	176.36	180.25	844	547
67.5M_A03_Run_ABI3130_2015-10-01_14-06_1039.fsa	P.PP.CC67.5M	127	B	176	176	176.13	176.13	2135	2135
67.6M_B03_Run_ABI3130_2015-10-01_14-06_1039.fsa	P.PP.CC67.6M	127	B	176	180	176.19	180.16	940	598
67.7M_C03_Run_ABI3130_2015-10-01_14-06_1039.fsa	P.PP.CC67.7M	127	B	176	180	176.21	180.14	796	499
67.8M_D03_Run_ABI3130_2015-10-01_14-06_1039.fsa	P.PP.CC67.8M	127	B	176	176	176.22	176.22	1052	1052
9.1F_C03_Run_ABI3130_2015-09-30_12-58_1025.fsa	P.PP.CC9.1F	127	B	176	180	176.09	180.08	1103	725
9.2F_D03_Run_ABI3130_2015-09-30_12-58_1025.fsa	P.PP.CC9.2F	127	B	176	180	176.24	180.13	881	584
9.3F_H02_Run_ABI3130_2015-09-30_12-58_1024.fsa	P.PP.CC9.3F	127	B	176	176	176.41	176.41	931	931
9.4F_A03_Run_ABI3130_2015-09-30_12-58_1025.fsa	P.PP.CC9.4F	127	B	176	180	176.21	180.09	1255	887
9.5F_F02_Run_ABI3130_2015-09-30_12-58_1024.fsa	P.PP.CC9.5F	127	B	176	180	176.26	180.22	673	428
9.6F_G02_Run_ABI3130_2015-09-30_12-58_1024.fsa	P.PP.CC9.6F	127	B	176	180	176.2	180.15	277	179
9.7M_G04_Run_ABI3130_2015-10-01_14-06_1039.fsa	P.PP.CC9.7M	127	B	176	176	176.21	176.21	1217	1217
9.8M_F04_Run_ABI3130_2015-10-01_14-06_1039.fsa	P.PP.CC9.8M	127	B	176	176	176.3	176.3	1013	1013
9.9_H04_Run_ABI3130_2015-10-01_14-06_1039.fsa	P.PP.CC9.9M	127	B	176	180	176.36	180.3	1285	840
CC.PP21.1M_G12_Run_ABI3130_2015-09-30_12-58_1029.fsa	CC.PP21.1M	127	B	176	180	176.26	180.2	556	351
CC.PP21.1M_G12_Run_ABI3130_2015-10-01_12-59_1037.fsa	CC.PP21.1M	127	B	176	180	176.22	180.22	361	236
CC.PP21.1M_G12_Run_ABI3130_2015-10-01_14-06_1043.fsa	CC.PP21.1M	127	B	176	180	176.3	180.19	659	400
PPPP602M_B03_Run_ABI3130_2015-09-30_12-58_1025.fsa	PP.PP60.2M	127	B	176	176	176.09	176.09	514	514
neg._H12_Run_ABI3130_2015-10-01_14-06_1043.fsa	Negative control	127	B
neg.control_H12_Run_ABI3130_2015-09-30_12-58_1029.fsa	Negative control	127	B
1.1F_E08_Run_ABI3130_2015-10-01_14-06_1041.fsa	P.PP.CC1.1F	315	G	128	134	127.87	133.86	458	344
1.2F_F08_Run_ABI3130_2015-10-01_14-06_1041.fsa	P.PP.CC1.2F	315	G	128	134	127.75	133.75	430	296
1.3F_G08_Run_ABI3130_2015-10-01_14-06_1041.fsa	P.PP.CC1.3F	315	G	134	134	133.78	133.78	688	688
1.4M_H08_Run_ABI3130_2015-10-01_14-06_1041.fsa	P.PP.CC1.4M	315	G	128	134	127.86	133.81	623	417
1.5M_A09_Run_ABI3130_2015-10-01_14-06_1042.fsa	P.PP.CC1.5M	315	G	128	134	127.7	133.68	1599	1242
12.1F_E02_Run_ABI3130_2015-09-30_12-58_1024.fsa	P.PP.CC12.1F	315	G	134	134	133.76	133.76	247	247
12.2M_D02_Run_ABI3130_2015-09-30_12-58_1024.fsa	P.PP.CC12.2M	315	G	128	134	127.77	133.79	317	238
13.1F_D12_Run_ABI3130_2015-10-01_14-06_1043.fsa	P.PP.CC13.1F	315	G	134	134	133.82	133.82	860	860
13.2F_E12_Run_ABI3130_2015-10-01_14-06_1043.fsa	P.PP.CC13.2F	315	G	134	134	133.82	133.82	508	508
13.3F_F12_Run_ABI3130_2015-10-01_14-06_1043.fsa	P.PP.CC13.3F	315	G	128	134	128.01	133.98	362	280
14.10M_E04_Run_ABI3130_2015-10-01_14-06_1039.fsa	P.PP.CC14.10M	315	G	134	134	133.79	133.79	597	597
14.5M_H03_Run_ABI3130_2015-10-01_14-06_1039.fsa	P.PP.CC14.5M	315	G	128	134	127.87	133.85	441	314
14.6M_A04_Run_ABI3130_2015-10-01_14-06_1039.fsa	P.PP.CC14.6M	315	G	128	134	127.78	133.72	495	373
14.7M_B04_Run_ABI3130_2015-10-01_14-06_1039.fsa	P.PP.CC14.7M	315	G	134	134	133.68	133.68	877	877
14.8M_C04_Run_ABI3130_2015-10-01_14-06_1039.fsa	P.PP.CC14.8M	315	G	128	134	127.74	133.74	719	544
14.9M_D04_Run_ABI3130_2015-10-01_14-06_1039.fsa	P.PP.CC14.9M	315	G	128	134	127.86	133.81	515	394
15.1F_B05_Run_ABI3130_2015-10-01_14-06_1040.fsa	P.PP.CC15.1F	315	G	128	134	127.76	133.76	618	456
15.2F_C05_Run_ABI3130_2015-10-01_14-06_1040.fsa	P.PP.CC15.2F	315	G	128	134	127.82	133.8	699	520
15.3F_D05_Run_ABI3130_2015-10-01_14-06_1040.fsa	P.PP.CC15.3F	315	G	134	134	133.84	133.84	601	601
15.4F_E05_Run_ABI3130_2015-10-01_14-06_1040.fsa	P.PP.CC15.4F	315	G	134	134	133.85	133.85	701	701
15.5M_F05_Run_ABI3130_2015-10-01_14-06_1040.fsa	P.PP.CC15.5M	315	G	128	134	127.85	133.85	494	353
15.6M_G05_Run_ABI3130_2015-10-01_14-06_1040.fsa	P.PP.CC15.6M	315	G	128	134	127.84	133.75	485	335
15.7M_H05_Run_ABI3130_2015-10-01_14-06_1040.fsa	P.PP.CC15.7M	315	G	134	134	133.88	133.88	625	625
16.1F_A01_Run_ABI3130_2015-09-30_12-58_1024.fsa	P.PP.CC16.1F	315	G	134	134	133.76	133.76	555	555
16.2F_D01_Run_ABI3130_2015-09-30_12-58_1024.fsa	P.PP.CC16.2F	315	G	134	134	133.69	133.69	135	135
16.3F_E01_Run_ABI3130_2015-09-30_12-58_1024.fsa	P.PP.CC16.3F	315	G	128	134	127.76	133.7	90	55
16.4M_F01_Run_ABI3130_2015-09-30_12-58_1024.fsa	P.PP.CC16.4M	315	G	128	134	127.82	133.95	95	65
16.5M_G01_Run_ABI3130_2015-09-30_12-58_1024.fsa	P.PP.CC16.5M	315	G	134	134	133.79	133.79	190	190
16.6M_H01_Run_ABI3130_2015-09-30_12-58_1024.fsa	P.PP.CC16.6M	315	G	128	134	127.82	133.78	113	71
17.1F_A06_Run_ABI3130_2015-10-01_14-06_1040.fsa	P.PP.CC17.1F	315	G	128	134	127.78	133.73	1751	1363
17.2F_A05_Run_ABI3130_2015-10-01_14-06_1040.fsa	P.PP.CC17.2F	315	G	134	134	133.75	133.75	2303	2303
17.3F_B01_Run_ABI3130_2015-09-30_12-58_1024.fsa	P.PP.CC17.3F	315	G	134	134	133.77	133.77	611	611
17.4F_C01_Run_ABI3130_2015-09-30_12-58_1024.fsa	P.PP.CC17.4F	315	G	134	134	133.86	133.86	130	130
17.5M_A02_Run_ABI3130_2015-09-30_12-58_1024.fsa	P.PP.CC17.5M	315	G	128	134	127.84	133.79	317	216
17.6M_B02_Run_ABI3130_2015-09-30_12-58_1024.fsa	P.PP.CC17.6M	315	G	134	134	133.68	133.68	519	519
17.7M_C02_Run_ABI3130_2015-09-30_12-58_1024.fsa	P.PP.CC17.7M	315	G	134	134	133.69	133.69	273	273
19.1F_D08_Run_ABI3130_2015-09-30_12-58_1027.fsa	P.PP.CC19.1F	315	G	134	134	133.8	133.8	499	499
19.2F_E08_Run_ABI3130_2015-09-30_12-58_1027.fsa	P.PP.CC19.2F	315	G	134	134	133.75	133.75	415	415
19.3F_F08_Run_ABI3130_2015-09-30_12-58_1027.fsa	P.PP.CC19.3F	315	G	134	134	133.76	133.76	344	344
19.4F_G08_Run_ABI3130_2015-09-30_12-58_1027.fsa	P.PP.CC19.4F	315	G	128	134	127.76	133.79	255	156
19.5F_H08_Run_ABI3130_2015-09-30_12-58_1027.fsa	P.PP.CC19.5F	315	G	134	134	133.82	133.82	321	321
19.6M_A09_Run_ABI3130_2015-09-30_12-58_1028.fsa	P.PP.CC19.6M	315	G	128	134	127.82	133.78	674	455
19.7M_B09_Run_ABI3130_2015-09-30_12-58_1028.fsa	P.PP.CC19.7M	315	G	128	134	127.72	133.68	488	356
19.8M_C09_Run_ABI3130_2015-09-30_12-58_1028.fsa	P.PP.CC19.8M	315	G	134	134	133.67	133.67	627	627
2.1F_B09_Run_ABI3130_2015-10-01_14-06_1042.fsa	P.PP.CC2.1F	315	G	128	134	127.88	133.78	722	553
2.2F_C09_Run_ABI3130_2015-10-01_14-06_1042.fsa	P.PP.CC2.2F	315	G	134	134	133.77	133.77	851	851
2.3F_D09_Run_ABI3130_2015-10-01_14-06_1042.fsa	P.PP.CC2.3F	315	G	128	134	127.89	133.87	615	471
2.4F_E09_Run_ABI3130_2015-10-01_14-06_1042.fsa	P.PP.CC2.4F	315	G	128	134	127.87	133.81	192	139
2.5M_F09_Run_ABI3130_2015-10-01_14-06_1042.fsa	P.PP.CC2.5M	315	G	134	134	133.8	133.8	669	669
20.10M_C08_Run_ABI3130_2015-09-30_12-58_1027.fsa	P.PP.CC20.10M	315	G	134	134	133.78	133.78	705	705
20.1F_B07_Run_ABI3130_2015-09-30_12-58_1027.fsa	P.PP.CC20.1F	315	G	128	134	127.78	133.67	649	475
20.2F_C07_Run_ABI3130_2015-09-30_12-58_1027.fsa	P.PP.CC20.2F	315	G	134	134	133.73	133.73	796	796
20.3F_D07_Run_ABI3130_2015-09-30_12-58_1027.fsa	P.PP.CC20.3F	315	G	134	134	133.68	133.68	447	447
20.4F_E07_Run_ABI3130_2015-09-30_12-58_1027.fsa	P.PP.CC20.4F	315	G	128	134	127.76	133.79	298	211
20.5F_F07_Run_ABI3130_2015-09-30_12-58_1027.fsa	P.PP.CC20.5F	315	G	128	134	127.8	133.77	292	206
20.6F_G07_Run_ABI3130_2015-09-30_12-58_1027.fsa	P.PP.CC20.6F	315	G	128	134	127.74	133.69	235	146
20.7F_H07_Run_ABI3130_2015-09-30_12-58_1027.fsa	P.PP.CC20.7F	315	G	134	134	133.78	133.78	293	293
20.8M_A08_Run_ABI3130_2015-09-30_12-58_1027.fsa	P.PP.CC20.8M	315	G	128	134	127.72	133.68	710	507
20.9M_B08_Run_ABI3130_2015-09-30_12-58_1027.fsa	P.PP.CC20.9M	315	G	134	134	133.79	133.79	356	356
21.1F_A04_Run_ABI3130_2015-09-30_12-58_1025.fsa	P.PP.CC21.1F	315	G	128	134	127.77	133.67	666	480
21.2F_B04_Run_ABI3130_2015-09-30_12-58_1025.fsa	P.PP.CC21.2F	315	G	134	134	133.67	133.67	355	355
21.3M_C04_Run_ABI3130_2015-09-30_12-58_1025.fsa	P.PP.CC21.3M	315	G	128	134	127.75	133.75	451	324
21.4M_D04_Run_ABI3130_2015-09-30_12-58_1025.fsa	P.PP.CC21.4M	315	G	134	134	133.76	133.76	452	452
21.5M_E04_Run_ABI3130_2015-09-30_12-58_1025.fsa	P.PP.CC21.5M	315	G	134	134	133.74	133.74	385	385
22.10M_A07_Run_ABI3130_2015-09-30_12-58_1027.fsa	P.PP.CC22.10M	315	G	128	134	127.73	133.69	815	582
22.1F_H05_Run_ABI3130_2015-09-30_12-58_1026.fsa	P.PP.CC22.1F	315	G	134	134	133.76	133.76	230	230
22.2F_A06_Run_ABI3130_2015-09-30_12-58_1026.fsa	P.PP.CC22.2F	315	G	134	134	133.76	133.76	926	926
22.3F_B06_Run_ABI3130_2015-09-30_12-58_1026.fsa	P.PP.CC22.3F	315	G	128	134	127.71	133.67	283	215
22.4F_C06_Run_ABI3130_2015-09-30_12-58_1026.fsa	P.PP.CC22.4F	315	G	134	134	133.65	133.65	604	604
22.5M_D06_Run_ABI3130_2015-09-30_12-58_1026.fsa	P.PP.CC22.5M	315	G	134	134	133.77	133.77	337	337
22.6M_E06_Run_ABI3130_2015-09-30_12-58_1026.fsa	P.PP.CC22.6M	315	G	134	134	133.76	133.76	510	510
22.7M_F06_Run_ABI3130_2015-09-30_12-58_1026.fsa	P.PP.CC22.7M	315	G	128	134	127.84	133.75	303	195
22.8M_G06_Run_ABI3130_2015-09-30_12-58_1026.fsa	P.PP.CC22.8M	315	G	128	134	127.81	133.77	185	117
22.9M_H06_Run_ABI3130_2015-09-30_12-58_1026.fsa	P.PP.CC22.9M	315	G	134	134	133.7	133.7	278	278
23.1M_E03_Run_ABI3130_2015-09-30_12-58_1025.fsa	P.PP.CC23.1M	315	G	128	134	127.8	133.86	313	213
23.2M_F03_Run_ABI3130_2015-09-30_12-58_1025.fsa	P.PP.CC23.2M	315	G	134	134	133.73	133.73	395	395
23.3M_G03_Run_ABI3130_2015-09-30_12-58_1025.fsa	P.PP.CC23.3M	315	G	134	134	133.75	133.75	259	259
23.4M_H03_Run_ABI3130_2015-09-30_12-58_1025.fsa	P.PP.CC23.4M	315	G	134	134	133.71	133.71	187	187
26.1F_D09_Run_ABI3130_2015-09-30_12-58_1028.fsa	P.PP.CC26.1F	315	G	128	134	127.73	133.77	268	192
26.2F_E09_Run_ABI3130_2015-09-30_12-58_1028.fsa	P.PP.CC26.2F	315	G	128	134	127.83	133.78	272	195
26.3F_F09_Run_ABI3130_2015-09-30_12-58_1028.fsa	P.PP.CC26.3F	315	G	128	134	127.82	133.87	249	160
26.4M_G09_Run_ABI3130_2015-09-30_12-58_1028.fsa	P.PP.CC26.4M	315	G	128	134	127.74	133.78	272	165
30.1F_A11_Run_ABI3130_2015-09-30_12-58_1029.fsa	P.PP.CC30.1F	315	G	128	134	127.66	133.7	385	280
30.2F_B11_Run_ABI3130_2015-09-30_12-58_1029.fsa	P.PP.CC30.2F	315	G	128	134	127.74	133.69	409	312
30.3F_C11_Run_ABI3130_2015-09-30_12-58_1029.fsa	P.PP.CC30.3F	315	G	128	134	127.81	133.77	340	265
30.4F_D11_Run_ABI3130_2015-09-30_12-58_1029.fsa	P.PP.CC30.4F	315	G	134	134	133.77	133.77	501	501
30.5F_E11_Run_ABI3130_2015-09-30_12-58_1029.fsa	P.PP.CC30.5F	315	G	128	134	127.84	133.83	234	150
30.6M_F11_Run_ABI3130_2015-09-30_12-58_1029.fsa	P.PP.CC30.6M	315	G	128	134	127.96	133.89	218	148
30.7M_G11_Run_ABI3130_2015-09-30_12-58_1029.fsa	P.PP.CC30.7M	315	G	128	134	127.9	133.82	194	110
30.8M_H11_Run_ABI3130_2015-09-30_12-58_1029.fsa	P.PP.CC30.8M	315	G
30.9M_A12_Run_ABI3130_2015-09-30_12-58_1029.fsa	P.PP.CC30.9M	315	G	128	134	127.76	133.79	516	377
32.10M_G05_Run_ABI3130_2015-09-30_12-58_1026.fsa	P.PP.CC32.10M	315	G	134	134	133.78	133.78	252	252
32.1BF_B10_Run_ABI3130_2015-09-30_12-58_1028.fsa	P.PP.CC32.1BF	315	G	134	134	133.76	133.76	451	451
32.1F_F04_Run_ABI3130_2015-09-30_12-58_1025.fsa	P.PP.CC32.1F	315	G	128	134	127.73	133.74	246	159
32.2BF_C10_Run_ABI3130_2015-09-30_12-58_1028.fsa	P.PP.CC32.2BF	315	G	134	134	133.69	133.69	552	552
32.2F_G04_Run_ABI3130_2015-09-30_12-58_1025.fsa	P.PP.CC32.2F	315	G	134	134	133.84	133.84	197	197
32.3BF_D10_Run_ABI3130_2015-09-30_12-58_1028.fsa	P.PP.CC32.3BF	315	G	134	134	133.69	133.69	375	375
32.3F_H04_Run_ABI3130_2015-09-30_12-58_1025.fsa	P.PP.CC32.3F	315	G	128	134	127.93	133.88	277	148
32.4BM_E10_Run_ABI3130_2015-09-30_12-58_1028.fsa	P.PP.CC32.4BM	315	G	134	134	133.77	133.77	248	248
32.4F_A05_Run_ABI3130_2015-09-30_12-58_1026.fsa	P.PP.CC32.4F	315	G	134	134	133.67	133.67	929	929
32.5BM_F10_Run_ABI3130_2015-09-30_12-58_1028.fsa	P.PP.CC32.5BM	315	G	134	134	133.85	133.85	267	267
32.5F_B05_Run_ABI3130_2015-09-30_12-58_1026.fsa	P.PP.CC32.5F	315	G	128	134	127.82	133.74	424	294
32.6BM_G10_Run_ABI3130_2015-09-30_12-58_1028.fsa	P.PP.CC32.6BM	315	G	128	134	127.85	133.79	213	132
32.6M_C05_Run_ABI3130_2015-09-30_12-58_1026.fsa	P.PP.CC32.6M	315	G	128	134	127.74	133.74	521	396
32.7BM_H10_Run_ABI3130_2015-09-30_12-58_1028.fsa	P.PP.CC32.7BM	315	G	134	134	133.82	133.82	199	199
32.7M_D05_Run_ABI3130_2015-09-30_12-58_1026.fsa	P.PP.CC32.7M	315	G	134	134	133.79	133.79	555	555
32.8M_E05_Run_ABI3130_2015-09-30_12-58_1026.fsa	P.PP.CC32.8M	315	G	134	134	133.76	133.76	388	388
32.9M_F05_Run_ABI3130_2015-09-30_12-58_1026.fsa	P.PP.CC32.9M	315	G	134	134	133.76	133.76	428	428
33.1M_H09_Run_ABI3130_2015-09-30_12-58_1028.fsa	P.PP.CC33.1M	315	G	134	134	133.89	133.89	206	206
33.2M_A10_Run_ABI3130_2015-09-30_12-58_1028.fsa	P.PP.CC33.2M	315	G	134	134	133.69	133.69	292	292
34.1F_B12_Run_ABI3130_2015-09-30_12-58_1029.fsa	P.PP.CC34.1F	315	G	134	134	133.71	133.71	389	389
34.2F_C12_Run_ABI3130_2015-09-30_12-58_1029.fsa	P.PP.CC34.2F	315	G	128	134	127.78	133.71	354	248
34.3F_D12_Run_ABI3130_2015-09-30_12-58_1029.fsa	P.PP.CC34.3F	315	G	128	134	127.8	133.81	219	156
34.4F_E12_Run_ABI3130_2015-09-30_12-58_1029.fsa	P.PP.CC34.4F	315	G	128	134	127.8	133.86	140	103
35.1F_C02_Run_ABI3130_2015-09-30_13-03_1030.fsa	P.PP.CC35.1F	315	G	134	134	133.81	133.81	325	325
35.2F_E02_Run_ABI3130_2015-09-30_13-03_1030.fsa	P.PP.CC35.2F	315	G	134	134	133.76	133.76	209	209
35.3F_D02_Run_ABI3130_2015-09-30_13-03_1030.fsa	P.PP.CC35.3F	315	G	134	134	133.7	133.7	244	244
35.4F_F02_Run_ABI3130_2015-09-30_13-03_1030.fsa	P.PP.CC35.4F	315	G	128	134	127.76	133.79	175	113
35.5F_G01_Run_ABI3130_2015-09-30_13-03_1030.fsa	P.PP.CC35.5F	315	G	134	134	133.77	133.77	179	179
35.6F_F01_Run_ABI3130_2015-09-30_13-03_1030.fsa	P.PP.CC35.6F	315	G	134	134	133.78	133.78	149	149
35.7F_A02_Run_ABI3130_2015-09-30_13-03_1030.fsa	P.PP.CC35.7F	315	G	134	134	133.69	133.69	630	630
35.8M_B02_Run_ABI3130_2015-09-30_13-03_1030.fsa	P.PP.CC35.8M	315	G	134	134	133.75	133.75	313	313
35.9M_H01_Run_ABI3130_2015-09-30_13-03_1030.fsa	P.PP.CC35.9M	315	G	134	134	133.79	133.79	163	163
36.1F_F12_Run_ABI3130_2015-09-30_12-58_1029.fsa	P.PP.CC36.1F	315	G	134	134	133.79	133.79	183	183
36.2F_A01_Run_ABI3130_2015-09-30_13-03_1030.fsa	P.PP.CC36.2F	315	G	128	134	127.76	133.7	521	398
36.3M_B01_Run_ABI3130_2015-09-30_13-03_1030.fsa	P.PP.CC36.3M	315	G	128	134	127.76	133.7	316	231
36.4M_C01_Run_ABI3130_2015-09-30_13-03_1030.fsa	P.PP.CC36.4M	315	G	128	134	127.73	133.74	242	181
36.5M_D01_Run_ABI3130_2015-09-30_13-03_1030.fsa	P.PP.CC36.5M	315	G	128	134	127.84	133.88	170	126
36.6M_E01_Run_ABI3130_2015-09-30_13-03_1030.fsa	P.PP.CC36.6M	315	G	134	134	133.77	133.77	187	187
36.7M_G02_Run_ABI3130_2015-09-30_13-03_1030.fsa	P.PP.CC36.7M	315	G	128	134	127.84	133.78	171	106
36.8M_H02_Run_ABI3130_2015-09-30_13-03_1030.fsa	P.PP.CC36.8M	315	G	134	134	133.84	133.84	175	175
37.1F_A03_Run_ABI3130_2015-09-30_18-42_1031.fsa	P.PP.CC37.1F	315	G	128	134	127.69	133.63	491	337
37.2F_C03_Run_ABI3130_2015-09-30_18-42_1031.fsa	P.PP.CC37.2F	315	G	134	134	133.72	133.72	471	471
37.3F_B03_Run_ABI3130_2015-09-30_18-42_1031.fsa	P.PP.CC37.3F	315	G	128	134	127.78	133.81	269	195
37.4M_D03_Run_ABI3130_2015-09-30_18-42_1031.fsa	P.PP.CC37.4M	315	G	128	134	127.73	133.74	364	247
37.5M_E03_Run_ABI3130_2015-09-30_18-42_1031.fsa	P.PP.CC37.5M	315	G	134	134	133.83	133.83	461	461
39.1F_E05_Run_ABI3130_2015-09-30_18-42_1032.fsa	P.PP.CC39.1F	315	G	128	134	127.84	133.83	174	118
39.2M_F05_Run_ABI3130_2015-09-30_18-42_1032.fsa	P.PP.CC39.2M	315	G	134	134	133.92	133.92	350	350
39.3M_G05_Run_ABI3130_2015-09-30_18-42_1032.fsa	P.PP.CC39.3M	315	G	128	134	127.89	133.82	258	136
39.4M_H05_Run_ABI3130_2015-09-30_18-42_1032.fsa	P.PP.CC39.4M	315	G	134	134	133.83	133.83	177	177
4.1F_G09_Run_ABI3130_2015-10-01_14-06_1042.fsa	P.PP.CC4.1F	315	G	134	134	133.81	133.81	462	462
4.2F_H09_Run_ABI3130_2015-10-01_14-06_1042.fsa	P.PP.CC4.2F	315	G	134	134	133.89	133.89	577	577
4.3F_A10_Run_ABI3130_2015-10-01_14-06_1042.fsa	P.PP.CC4.3F	315	G	128	134	127.81	133.78	1209	868
4.4F_B10_Run_ABI3130_2015-10-01_14-06_1042.fsa	P.PP.CC4.4F	315	G
4.5M_C10_Run_ABI3130_2015-10-01_14-06_1042.fsa	P.PP.CC4.5M	315	G	134	134	133.81	133.81	751	751
4.6M_D10_Run_ABI3130_2015-10-01_14-06_1042.fsa	P.PP.CC4.6M	315	G	128	134	127.84	133.8	520	381
4.7M_E10_Run_ABI3130_2015-10-01_14-06_1042.fsa	P.PP.CC4.7M	315	G	128	134	127.81	133.87	258	179
41.10M_B08_Run_ABI3130_2015-10-01_08-58_1034.fsa	P.PP.CC41.10M	315	G	134	134	133.71	133.71	360	360
41.11M_C08_Run_ABI3130_2015-10-01_08-58_1034.fsa	P.PP.CC41.11M	315	G	134	134	133.93	133.93	426	426
41.1F_D08_Run_ABI3130_2015-10-01_08-58_1034.fsa	P.PP.CC41.1F	315	G	134	134	133.8	133.8	390	390
41.2F_E08_Run_ABI3130_2015-10-01_08-58_1034.fsa	P.PP.CC41.2F	315	G	128	134	127.91	133.87	178	113
41.3F_F08_Run_ABI3130_2015-10-01_08-58_1034.fsa	P.PP.CC41.3F	315	G	128	134	127.85	133.92	192	116
41.4F_G08_Run_ABI3130_2015-10-01_08-58_1034.fsa	P.PP.CC41.4F	315	G	128	134	128.01	133.96	288	195
41.5F_H08_Run_ABI3130_2015-10-01_08-58_1034.fsa	P.PP.CC41.5F	315	G	134	134	133.93	133.93	220	220
41.6F_A09_Run_ABI3130_2015-10-01_10-01_1036.fsa	P.PP.CC41.6F	315	G	134	134	133.71	133.71	727	727
41.7F_G07_Run_ABI3130_2015-10-01_08-58_1034.fsa	P.PP.CC41.7F	315	G	134	134	133.97	133.97	309	309
41.8F_H07_Run_ABI3130_2015-10-01_08-58_1034.fsa	P.PP.CC41.8F	315	G	128	134	127.94	133.88	182	106
41.9M_A08_Run_ABI3130_2015-10-01_08-58_1034.fsa	P.PP.CC41.9M	315	G	134	134	133.8	133.8	785	785
42.10M_C05_Run_ABI3130_2015-09-30_18-42_1032.fsa	P.PP.CC42.10M	315	G	134	134	133.68	133.68	380	380
42.1F_C04_Run_ABI3130_2015-09-30_18-42_1031.fsa	P.PP.CC42.1F	315	G	128	134	127.78	133.76	268	190
42.2F_D04_Run_ABI3130_2015-09-30_18-42_1031.fsa	P.PP.CC42.2F	315	G	128	134	127.76	133.84	170	139
42.3F_E04_Run_ABI3130_2015-09-30_18-42_1031.fsa	P.PP.CC42.3F	315	G	128	134	127.78	133.71	213	151
42.4F_H04_Run_ABI3130_2015-09-30_18-42_1031.fsa	P.PP.CC42.4F	315	G	128	134	127.87	133.8	227	134
42.5F_A05_Run_ABI3130_2015-09-30_18-42_1032.fsa	P.PP.CC42.5F	315	G	134	134	133.72	133.72	786	786
42.6F_B05_Run_ABI3130_2015-09-30_18-42_1032.fsa	P.PP.CC42.6F	315	G	128	134	127.78	133.72	393	284
42.7M_F04_Run_ABI3130_2015-09-30_18-42_1031.fsa	P.PP.CC42.7M	315	G	128	134	127.7	133.72	184	113
42.8M_G04_Run_ABI3130_2015-09-30_18-42_1031.fsa	P.PP.CC42.8M	315	G	128	134	127.84	133.83	280	168
42.9M_D05_Run_ABI3130_2015-09-30_18-42_1032.fsa	P.PP.CC42.9M	315	G	128	134	127.82	133.74	268	199
43.10M_C10_Run_ABI3130_2015-10-01_10-01_1036.fsa	P.PP.CC43.10M	315	G	134	134	133.8	133.8	390	390
43.1F_B09_Run_ABI3130_2015-10-01_10-01_1036.fsa	P.PP.CC43.1F	315	G	128	134	127.75	133.7	410	299
43.2F_C09_Run_ABI3130_2015-10-01_10-01_1036.fsa	P.PP.CC43.2F	315	G	128	134	127.69	133.67	352	251
43.3F_E09_Run_ABI3130_2015-10-01_10-01_1036.fsa	P.PP.CC43.3F	315	G	134	134	133.81	133.81	289	289
43.4F_D09_Run_ABI3130_2015-10-01_10-01_1036.fsa	P.PP.CC43.4F	315	G	128	134	127.81	133.73	282	190
43.5M_F09_Run_ABI3130_2015-10-01_10-01_1036.fsa	P.PP.CC43.5M	315	G	128	134	127.8	133.81	228	147
43.6M_G09_Run_ABI3130_2015-10-01_10-01_1036.fsa	P.PP.CC43.6M	315	G	134	134	133.8	133.8	198	198
43.7M_H09_Run_ABI3130_2015-10-01_10-01_1036.fsa	P.PP.CC43.7M	315	G	128	134	127.94	133.93	181	111
43.8M_A10_Run_ABI3130_2015-10-01_10-01_1036.fsa	P.PP.CC43.8M	315	G	128	134	127.65	133.6	274	190
43.9M_B10_Run_ABI3130_2015-10-01_10-01_1036.fsa	P.PP.CC43.9M	315	G	128	134	127.76	133.7	276	197
44.1F_A06_Run_ABI3130_2015-09-30_18-42_1032.fsa	P.PP.CC44.1F	315	G	134	134	133.73	133.73	863	863
44.2F_B06_Run_ABI3130_2015-09-30_18-42_1032.fsa	P.PP.CC44.2F	315	G	134	134	133.73	133.73	524	524
44.3M_C06_Run_ABI3130_2015-09-30_18-42_1032.fsa	P.PP.CC44.3M	315	G	134	134	133.76	133.76	519	519
45.1F_E10_Run_ABI3130_2015-10-01_10-01_1036.fsa	P.PP.CC45.1F	315	G	134	134	134	134	158	158
45.2F_D10_Run_ABI3130_2015-10-01_10-01_1036.fsa	P.PP.CC45.2F	315	G	128	134	127.9	133.82	322	219
45.3M_F10_Run_ABI3130_2015-10-01_10-01_1036.fsa	P.PP.CC45.3M	315	G	134	134	133.88	133.88	217	217
46.10F_E07_Run_ABI3130_2015-10-01_08-58_1034.fsa	P.PP.CC46.10F	315	G	128	134	127.87	133.88	234	160
46.11M_F07_Run_ABI3130_2015-10-01_08-58_1034.fsa	P.PP.CC46.11M	315	G	134	134	133.84	133.84	287	287
46.1F_D06_Run_ABI3130_2015-09-30_18-42_1032.fsa	P.PP.CC46.1F	315	G	134	134	133.74	133.74	382	382
46.2F_E06_Run_ABI3130_2015-09-30_18-42_1032.fsa	P.PP.CC46.2F	315	G	134	134	133.81	133.81	222	222
46.3M_F06_Run_ABI3130_2015-09-30_18-42_1032.fsa	P.PP.CC46.3M	315	G	128	134	127.88	133.81	176	114
46.4M_G06_Run_ABI3130_2015-09-30_18-42_1032.fsa	P.PP.CC46.4M	315	G	134	134	133.83	133.83	268	268
46.5M_H06_Run_ABI3130_2015-09-30_18-42_1032.fsa	P.PP.CC46.5M	315	G	128	134	127.95	133.89	222	142
46.6M_A07_Run_ABI3130_2015-10-01_08-58_1034.fsa	P.PP.CC46.6M	315	G	134	134	133.8	133.8	734	734
46.7F_B07_Run_ABI3130_2015-10-01_08-58_1034.fsa	P.PP.CC46.7F	315	G	134	134	133.78	133.78	506	506
46.8F_C07_Run_ABI3130_2015-10-01_08-58_1034.fsa	P.PP.CC46.8F	315	G	128	134	127.83	133.87	304	229
46.9M_D07_Run_ABI3130_2015-10-01_08-58_1034.fsa	P.PP.CC46.9M	315	G	128	134	127.86	133.79	235	157
47.1F_F03_Run_ABI3130_2015-09-30_18-42_1031.fsa	P.PP.CC47.1F	315	G	128	134	127.73	133.82	267	156
47.1F_G10_Run_ABI3130_2015-10-01_10-01_1036.fsa	P.PP.CC47.1F	315	G	128	134	127.81	133.82	193	107
47.2F_G03_Run_ABI3130_2015-09-30_18-42_1031.fsa	P.PP.CC47.2F	315	G	134	134	133.8	133.8	274	274
47.2F_H10_Run_ABI3130_2015-10-01_10-01_1036.fsa	P.PP.CC47.2F	315	G	128	134	127.93	133.87	174	104
47.3F_A11_Run_ABI3130_2015-10-01_12-59_1037.fsa	P.PP.CC47.3F	315	G	134	134	133.78	133.78	600	600
47.3M_H03_Run_ABI3130_2015-09-30_18-42_1031.fsa	P.PP.CC47.3M	315	G	134	134	133.82	133.82	177	177
47.4F_B11_Run_ABI3130_2015-10-01_12-59_1037.fsa	P.PP.CC47.4F	315	G	134	134	133.7	133.7	416	416
47.4M_A04_Run_ABI3130_2015-09-30_18-42_1031.fsa	P.PP.CC47.4M	315	G	134	134	133.73	133.73	811	811
47.5F_C11_Run_ABI3130_2015-10-01_12-59_1037.fsa	P.PP.CC47.5F	315	G	128	134	127.8	133.78	397	266
47.5M_B04_Run_ABI3130_2015-09-30_18-42_1031.fsa	P.PP.CC47.5M	315	G	128	134	127.6	133.62	368	269
47.6M_E11_Run_ABI3130_2015-10-01_12-59_1037.fsa	P.PP.CC47.6M	315	G	128	134	127.86	133.89	205	136
47.7M_D11_Run_ABI3130_2015-10-01_12-59_1037.fsa	P.PP.CC47.7M	315	G	128	134	127.73	133.87	192	121
48.1F_F11_Run_ABI3130_2015-10-01_12-59_1037.fsa	P.PP.CC48.1F	315	G	128	134	127.88	133.9	171	112
48.2F_G11_Run_ABI3130_2015-10-01_12-59_1037.fsa	P.PP.CC48.2F	315	G	128	134	127.89	133.72	215	115
48.3F_H11_Run_ABI3130_2015-10-01_12-59_1037.fsa	P.PP.CC48.3F	315	G	134	134	133.83	133.83	166	166
48.4F_B12_Run_ABI3130_2015-10-01_12-59_1037.fsa	P.PP.CC48.4F	315	G	128	134	127.88	133.9	237	154
48.5M_A12_Run_ABI3130_2015-10-01_12-59_1037.fsa	P.PP.CC48.5M	315	G	128	134	127.73	133.69	360	268
48.6M_C12_Run_ABI3130_2015-10-01_12-59_1037.fsa	P.PP.CC48.6M	315	G	134	134	133.72	133.72	259	259
48.7M_D12_Run_ABI3130_2015-10-01_12-59_1037.fsa	P.PP.CC48.7M	315	G	128	134	127.87	133.81	177	129
48.8M_E12_Run_ABI3130_2015-10-01_12-59_1037.fsa	P.PP.CC48.8M	315	G	128	134	127.94	133.89	102	59
5.1F_F10_Run_ABI3130_2015-10-01_14-06_1042.fsa	P.PP.CC5.1F	315	G	128	134	127.89	133.87	354	248
5.2F_G10_Run_ABI3130_2015-10-01_14-06_1042.fsa	P.PP.CC5.2F	315	G	128	134	127.84	133.89	269	164
5.3M_H10_Run_ABI3130_2015-10-01_14-06_1042.fsa	P.PP.CC5.3M	315	G	128	134	127.84	133.84	537	369
5.4M_A11_Run_ABI3130_2015-10-01_14-06_1043.fsa	P.PP.CC5.4M	315	G	134	134	133.79	133.79	1844	1844
5.5M_B11_Run_ABI3130_2015-10-01_14-06_1043.fsa	P.PP.CC5.5M	315	G	128	134	127.83	133.79	803	591
5.6M_C11_Run_ABI3130_2015-10-01_14-06_1043.fsa	P.PP.CC5.6M	315	G	128	134	127.79	133.77	545	396
5.7M_D11_Run_ABI3130_2015-10-01_14-06_1043.fsa	P.PP.CC5.7M	315	G	128	134	127.74	133.79	501	368
50.1F_B08_Run_ABI3130_2015-10-01_14-06_1041.fsa	P.PP.CC50.1F	315	G	134	134	133.75	133.75	681	681
50.2F_C08_Run_ABI3130_2015-10-01_14-06_1041.fsa	P.PP.CC50.2F	315	G
50.3F_D08_Run_ABI3130_2015-10-01_14-06_1041.fsa	P.PP.CC50.3F	315	G	134	134	133.79	133.79	524	524
51.1M_D07_Run_ABI3130_2015-10-01_14-06_1041.fsa	P.PP.CC51.1M	315	G	134	134	133.75	133.75	703	703
51.2M_E07_Run_ABI3130_2015-10-01_14-06_1041.fsa	P.PP.CC51.2M	315	G	134	134	133.89	133.89	538	538
51.3M_F07_Run_ABI3130_2015-10-01_14-06_1041.fsa	P.PP.CC51.3M	315	G	134	134	133.86	133.86	734	734
51.4M_G07_Run_ABI3130_2015-10-01_14-06_1041.fsa	P.PP.CC51.4M	315	G	134	134	133.77	133.77	637	637
51.5M_H07_Run_ABI3130_2015-10-01_14-06_1041.fsa	P.PP.CC51.5M	315	G	128	134	127.87	133.86	348	233
51.6M_A08_Run_ABI3130_2015-10-01_14-06_1041.fsa	P.PP.CC51.6M	315	G	134	134	133.76	133.76	1341	1341
52.1F_G06_Run_ABI3130_2015-10-01_14-06_1040.fsa	P.PP.CC52.1F	315	G	128	134	127.75	133.75	343	232
52.2F_H06_Run_ABI3130_2015-10-01_14-06_1040.fsa	P.PP.CC52.2F	315	G	128	134	127.87	133.81	440	296
52.3M_A07_Run_ABI3130_2015-10-01_14-06_1041.fsa	P.PP.CC52.3M	315	G	128	134	127.75	133.76	1029	746
52.4M_B07_Run_ABI3130_2015-10-01_14-06_1041.fsa	P.PP.CC52.4M	315	G	128	134	127.74	133.75	763	561
52.5M_C07_Run_ABI3130_2015-10-01_14-06_1041.fsa	P.PP.CC52.5M	315	G	134	134	133.73	133.73	919	919
54.1F_F12_Run_ABI3130_2015-10-01_12-59_1037.fsa	P.PP.CC54.1F	315	G
54.2F_B06_Run_ABI3130_2015-10-01_14-06_1040.fsa	P.PP.CC54.2F	315	G	134	134	133.85	133.85	535	535
54.3F_C06_Run_ABI3130_2015-10-01_14-06_1040.fsa	P.PP.CC54.3F	315	G	134	134	133.87	133.87	684	684
54.4M_D06_Run_ABI3130_2015-10-01_14-06_1040.fsa	P.PP.CC54.4M	315	G	128	134	127.81	133.83	201	158
54.5M_E06_Run_ABI3130_2015-10-01_14-06_1040.fsa	P.PP.CC54.5M	315	G	128	134	127.84	133.85	242	168
54.6M_F06_Run_ABI3130_2015-10-01_14-06_1040.fsa	P.PP.CC54.6M	315	G	134	134	133.76	133.76	401	401
6.1F_E11_Run_ABI3130_2015-10-01_14-06_1043.fsa	P.PP.CC6.1F	315	G	134	134	133.9	133.9	202	202
6.2F_F11_Run_ABI3130_2015-10-01_14-06_1043.fsa	P.PP.CC6.2F	315	G	128	134	127.79	133.76	349	256
6.3M_G11_Run_ABI3130_2015-10-01_14-06_1043.fsa	P.PP.CC6.3M	315	G	128	134	127.9	133.92	274	191
6.4M_H11_Run_ABI3130_2015-10-01_14-06_1043.fsa	P.PP.CC6.4M	315	G	128	134	127.87	133.81	352	247
6.5M_A12_Run_ABI3130_2015-10-01_14-06_1043.fsa	P.PP.CC6.5M	315	G	134	134	133.81	133.81	979	979
6.6M_B12_Run_ABI3130_2015-10-01_14-06_1043.fsa	P.PP.CC6.6M	315	G	128	134	127.77	133.71	498	360
6.7M_C12_Run_ABI3130_2015-10-01_14-06_1043.fsa	P.PP.CC6.7M	315	G	128	134	127.79	133.73	604	438
61.1F_A01_Run_ABI3130_2015-10-01_14-06_1038.fsa	P.PP.CC61.1F	315	G	128	134	127.84	133.79	1090	826
61.2F_B01_Run_ABI3130_2015-10-01_14-06_1038.fsa	P.PP.CC61.2F	315	G	134	134	133.78	133.78	543	543
61.3F_C01_Run_ABI3130_2015-10-01_14-06_1038.fsa	P.PP.CC61.3F	315	G	128	134	127.77	133.76	391	300
61.4F_D01_Run_ABI3130_2015-10-01_14-06_1038.fsa	P.PP.CC61.4F	315	G	134	134	133.81	133.81	557	557
63.2M_E01_Run_ABI3130_2015-10-01_14-06_1038.fsa	P.PP.CC63.2M	315	G	134	134	133.91	133.91	432	432
63.3M_F01_Run_ABI3130_2015-10-01_14-06_1038.fsa	P.PP.CC63.3M	315	G	128	134	127.86	133.8	331	235
63.4M_G01_Run_ABI3130_2015-10-01_14-06_1038.fsa	P.PP.CC63.4M	315	G	128	134	127.89	133.91	262	165
65.1F_E03_Run_ABI3130_2015-10-01_14-06_1039.fsa	P.PP.CC65.1F	315	G	134	134	133.9	133.9	563	563
65.2F_F03_Run_ABI3130_2015-10-01_14-06_1039.fsa	P.PP.CC65.2F	315	G	128	134	127.87	133.81	422	302
65.3F_G03_Run_ABI3130_2015-10-01_14-06_1039.fsa	P.PP.CC65.3F	315	G	134	134	133.78	133.78	411	411
66.1F_H01_Run_ABI3130_2015-10-01_14-06_1038.fsa	P.PP.CC66.1F	315	G	134	134	133.88	133.88	581	581
66.2F_A02_Run_ABI3130_2015-10-01_14-06_1038.fsa	P.PP.CC66.2F	315	G	134	134	133.79	133.79	1305	1305
66.3F_B02_Run_ABI3130_2015-10-01_14-06_1038.fsa	P.PP.CC66.3F	315	G	134	134	133.81	133.81	647	647
66.4M_C02_Run_ABI3130_2015-10-01_14-06_1038.fsa	P.PP.CC66.4M	315	G	134	134	133.81	133.81	700	700
66.5M_D02_Run_ABI3130_2015-10-01_14-06_1038.fsa	P.PP.CC66.5M	315	G	134	134	133.81	133.81	1021	1021
67.1F_E02_Run_ABI3130_2015-10-01_14-06_1038.fsa	P.PP.CC67.1F	315	G	134	134	133.79	133.79	565	565
67.2F_F02_Run_ABI3130_2015-10-01_14-06_1038.fsa	P.PP.CC67.2F	315	G	134	134	133.89	133.89	590	590
67.3F_G02_Run_ABI3130_2015-10-01_14-06_1038.fsa	P.PP.CC67.3F	315	G	128	134	127.89	133.81	393	276
67.4F_H02_Run_ABI3130_2015-10-01_14-06_1038.fsa	P.PP.CC67.4F	315	G	134	134	133.83	133.83	715	715
67.5M_A03_Run_ABI3130_2015-10-01_14-06_1039.fsa	P.PP.CC67.5M	315	G	128	134	127.69	133.72	1316	933
67.6M_B03_Run_ABI3130_2015-10-01_14-06_1039.fsa	P.PP.CC67.6M	315	G	134	134	133.75	133.75	934	934
67.7M_C03_Run_ABI3130_2015-10-01_14-06_1039.fsa	P.PP.CC67.7M	315	G	128	134	127.74	133.66	668	466
67.8M_D03_Run_ABI3130_2015-10-01_14-06_1039.fsa	P.PP.CC67.8M	315	G	134	134	133.72	133.72	797	797
9.1F_C03_Run_ABI3130_2015-09-30_12-58_1025.fsa	P.PP.CC9.1F	315	G	134	134	133.64	133.64	642	642
9.2F_D03_Run_ABI3130_2015-09-30_12-58_1025.fsa	P.PP.CC9.2F	315	G	134	134	133.75	133.75	526	526
9.3F_H02_Run_ABI3130_2015-09-30_12-58_1024.fsa	P.PP.CC9.3F	315	G	128	134	127.92	133.74	112	51
9.4F_A03_Run_ABI3130_2015-09-30_12-58_1025.fsa	P.PP.CC9.4F	315	G	134	134	133.66	133.66	915	915
9.5F_F02_Run_ABI3130_2015-09-30_12-58_1024.fsa	P.PP.CC9.5F	315	G	134	134	133.76	133.76	198	198
9.6F_G02_Run_ABI3130_2015-09-30_12-58_1024.fsa	P.PP.CC9.6F	315	G	134	134	133.87	133.87	228	228
9.7M_G04_Run_ABI3130_2015-10-01_14-06_1039.fsa	P.PP.CC9.7M	315	G	134	134	133.82	133.82	580	580
9.8M_F04_Run_ABI3130_2015-10-01_14-06_1039.fsa	P.PP.CC9.8M	315	G	134	134	133.73	133.73	521	521
9.9_H04_Run_ABI3130_2015-10-01_14-06_1039.fsa	P.PP.CC9.9M	315	G	128	134	127.91	133.87	552	371
CC.PP21.1M_G12_Run_ABI3130_2015-09-30_12-58_1029.fsa	CC.PP21.1M	315	G	128	134	127.83	133.73	159	86
CC.PP21.1M_G12_Run_ABI3130_2015-10-01_12-59_1037.fsa	CC.PP21.1M	315	G	128	134	127.79	133.81	151	108
CC.PP21.1M_G12_Run_ABI3130_2015-10-01_14-06_1043.fsa	CC.PP21.1M	315	G	128	134	127.87	133.81	374	261
PPPP602M_B03_Run_ABI3130_2015-09-30_12-58_1025.fsa	PP.PP60.2M	315	G	134	134	133.65	133.65	420	420
neg._H12_Run_ABI3130_2015-10-01_14-06_1043.fsa	Negative control	315	G
neg.control_H12_Run_ABI3130_2015-09-30_12-58_1029.fsa	Negative control	315	G
1.1F_E08_Run_ABI3130_2015-10-01_14-06_1041.fsa	P.PP.CC1.1F	316	B	115	136	114.59	136.02	1039	283
1.2F_F08_Run_ABI3130_2015-10-01_14-06_1041.fsa	P.PP.CC1.2F	316	B	115	136	114.5	135.92	1026	299
1.3F_G08_Run_ABI3130_2015-10-01_14-06_1041.fsa	P.PP.CC1.3F	316	B	136	136	135.93	135.93	528	528
1.4M_H08_Run_ABI3130_2015-10-01_14-06_1041.fsa	P.PP.CC1.4M	316	B	115	136	114.55	136.04	1338	373
1.5M_A09_Run_ABI3130_2015-10-01_14-06_1042.fsa	P.PP.CC1.5M	316	B	115	136	114.48	135.93	2466	741
12.1F_E02_Run_ABI3130_2015-09-30_12-58_1024.fsa	P.PP.CC12.1F	316	B	136	136	135.94	135.94	648	648
12.2M_D02_Run_ABI3130_2015-09-30_12-58_1024.fsa	P.PP.CC12.2M	316	B	115	136	114.45	135.96	1105	423
13.1F_D12_Run_ABI3130_2015-10-01_14-06_1043.fsa	P.PP.CC13.1F	316	B	136	136	135.96	135.96	315	315
13.2F_E12_Run_ABI3130_2015-10-01_14-06_1043.fsa	P.PP.CC13.2F	316	B	136	136	135.96	135.96	534	534
13.3F_F12_Run_ABI3130_2015-10-01_14-06_1043.fsa	P.PP.CC13.3F	316	B	115	136	114.62	136.13	799	234
14.10M_E04_Run_ABI3130_2015-10-01_14-06_1039.fsa	P.PP.CC14.10M	316	B	136	136	135.94	135.94	798	798
14.5M_H03_Run_ABI3130_2015-10-01_14-06_1039.fsa	P.PP.CC14.5M	316	B	115	136	114.59	136.07	926	239
14.6M_A04_Run_ABI3130_2015-10-01_14-06_1039.fsa	P.PP.CC14.6M	316	B	115	136	114.47	135.95	1633	474
14.7M_B04_Run_ABI3130_2015-10-01_14-06_1039.fsa	P.PP.CC14.7M	316	B	136	136	135.93	135.93	632	632
14.8M_C04_Run_ABI3130_2015-10-01_14-06_1039.fsa	P.PP.CC14.8M	316	B	115	136	114.43	135.88	1518	401
14.9M_D04_Run_ABI3130_2015-10-01_14-06_1039.fsa	P.PP.CC14.9M	316	B	115	136	114.53	136.04	1403	382
15.1F_B05_Run_ABI3130_2015-10-01_14-06_1040.fsa	P.PP.CC15.1F	316	B	115	136	114.51	135.92	1512	414
15.2F_C05_Run_ABI3130_2015-10-01_14-06_1040.fsa	P.PP.CC15.2F	316	B	115	136	114.57	136.08	1283	382
15.3F_D05_Run_ABI3130_2015-10-01_14-06_1040.fsa	P.PP.CC15.3F	316	B	136	136	136.01	136.01	804	804
15.4F_E05_Run_ABI3130_2015-10-01_14-06_1040.fsa	P.PP.CC15.4F	316	B	136	136	136.01	136.01	1005	1005
15.5M_F05_Run_ABI3130_2015-10-01_14-06_1040.fsa	P.PP.CC15.5M	316	B	115	136	114.51	135.92	1147	329
15.6M_G05_Run_ABI3130_2015-10-01_14-06_1040.fsa	P.PP.CC15.6M	316	B	115	136	114.59	135.92	1342	388
15.7M_H05_Run_ABI3130_2015-10-01_14-06_1040.fsa	P.PP.CC15.7M	316	B	136	136	136.03	136.03	706	706
16.1F_A01_Run_ABI3130_2015-09-30_12-58_1024.fsa	P.PP.CC16.1F	316	B	136	136	135.94	135.94	1301	1301
16.2F_D01_Run_ABI3130_2015-09-30_12-58_1024.fsa	P.PP.CC16.2F	316	B	136	136	135.86	135.86	543	543
16.3F_E01_Run_ABI3130_2015-09-30_12-58_1024.fsa	P.PP.CC16.3F	316	B	115	136	114.43	135.95	635	223
16.4M_F01_Run_ABI3130_2015-09-30_12-58_1024.fsa	P.PP.CC16.4M	316	B	115	136	114.52	135.95	791	272
16.5M_G01_Run_ABI3130_2015-09-30_12-58_1024.fsa	P.PP.CC16.5M	316	B	136	136	135.96	135.96	594	594
16.6M_H01_Run_ABI3130_2015-09-30_12-58_1024.fsa	P.PP.CC16.6M	316	B	115	136	114.61	136.04	644	196
17.1F_A06_Run_ABI3130_2015-10-01_14-06_1040.fsa	P.PP.CC17.1F	316	B	115	136	114.47	135.9	2436	740
17.2F_A05_Run_ABI3130_2015-10-01_14-06_1040.fsa	P.PP.CC17.2F	316	B	136	136	135.92	135.92	1653	1653
17.3F_B01_Run_ABI3130_2015-09-30_12-58_1024.fsa	P.PP.CC17.3F	316	B	136	136	135.94	135.94	1020	1020
17.4F_C01_Run_ABI3130_2015-09-30_12-58_1024.fsa	P.PP.CC17.4F	316	B	136	136	136.03	136.03	544	544
17.5M_A02_Run_ABI3130_2015-09-30_12-58_1024.fsa	P.PP.CC17.5M	316	B	115	136	114.54	136.04	1278	423
17.6M_B02_Run_ABI3130_2015-09-30_12-58_1024.fsa	P.PP.CC17.6M	316	B	136	136	135.85	135.85	955	955
17.7M_C02_Run_ABI3130_2015-09-30_12-58_1024.fsa	P.PP.CC17.7M	316	B	136	136	135.95	135.95	652	652
19.1F_D08_Run_ABI3130_2015-09-30_12-58_1027.fsa	P.PP.CC19.1F	316	B	136	136	135.96	135.96	901	901
19.2F_E08_Run_ABI3130_2015-09-30_12-58_1027.fsa	P.PP.CC19.2F	316	B	136	136	135.93	135.93	1049	1049
19.3F_F08_Run_ABI3130_2015-09-30_12-58_1027.fsa	P.PP.CC19.3F	316	B	136	136	135.94	135.94	1058	1058
19.4F_G08_Run_ABI3130_2015-09-30_12-58_1027.fsa	P.PP.CC19.4F	316	B	115	136	114.52	135.95	1545	441
19.5F_H08_Run_ABI3130_2015-09-30_12-58_1027.fsa	P.PP.CC19.5F	316	B	136	136	136.06	136.06	1267	1267
19.6M_A09_Run_ABI3130_2015-09-30_12-58_1028.fsa	P.PP.CC19.6M	316	B	115	136	114.49	135.95	2662	753
19.7M_B09_Run_ABI3130_2015-09-30_12-58_1028.fsa	P.PP.CC19.7M	316	B	115	136	114.42	135.94	1678	453
19.8M_C09_Run_ABI3130_2015-09-30_12-58_1028.fsa	P.PP.CC19.8M	316	B	136	136	135.85	135.85	1326	1326
2.1F_B09_Run_ABI3130_2015-10-01_14-06_1042.fsa	P.PP.CC2.1F	316	B	115	136	114.54	136.02	1116	326
2.2F_C09_Run_ABI3130_2015-10-01_14-06_1042.fsa	P.PP.CC2.2F	316	B	136	136	135.93	135.93	1051	1051
2.3F_D09_Run_ABI3130_2015-10-01_14-06_1042.fsa	P.PP.CC2.3F	316	B	115	136	114.58	136.03	1191	351
2.4F_E09_Run_ABI3130_2015-10-01_14-06_1042.fsa	P.PP.CC2.4F	316	B	115	136	114.56	135.95	1090	296
2.5M_F09_Run_ABI3130_2015-10-01_14-06_1042.fsa	P.PP.CC2.5M	316	B	136	136	136.04	136.04	881	881
20.10M_C08_Run_ABI3130_2015-09-30_12-58_1027.fsa	P.PP.CC20.10M	316	B	136	136	135.95	135.95	1433	1433
20.1F_B07_Run_ABI3130_2015-09-30_12-58_1027.fsa	P.PP.CC20.1F	316	B	115	136	114.45	135.94	1900	493
20.2F_C07_Run_ABI3130_2015-09-30_12-58_1027.fsa	P.PP.CC20.2F	316	B	136	136	135.92	135.92	1249	1249
20.3F_D07_Run_ABI3130_2015-09-30_12-58_1027.fsa	P.PP.CC20.3F	316	B	136	136	135.86	135.86	754	754
20.4F_E07_Run_ABI3130_2015-09-30_12-58_1027.fsa	P.PP.CC20.4F	316	B	115	136	114.4	135.96	1505	458
20.5F_F07_Run_ABI3130_2015-09-30_12-58_1027.fsa	P.PP.CC20.5F	316	B	115	136	114.42	135.94	1628	487
20.6F_G07_Run_ABI3130_2015-09-30_12-58_1027.fsa	P.PP.CC20.6F	316	B	115	136	114.47	135.86	1133	365
20.7F_H07_Run_ABI3130_2015-09-30_12-58_1027.fsa	P.PP.CC20.7F	316	B	136	136	135.95	135.95	1110	1110
20.8M_A08_Run_ABI3130_2015-09-30_12-58_1027.fsa	P.PP.CC20.8M	316	B	115	136	114.42	135.86	2435	713
20.9M_B08_Run_ABI3130_2015-09-30_12-58_1027.fsa	P.PP.CC20.9M	316	B	136	136	135.96	135.96	712	712
21.1F_A04_Run_ABI3130_2015-09-30_12-58_1025.fsa	P.PP.CC21.1F	316	B	115	136	114.41	135.93	2071	647
21.2F_B04_Run_ABI3130_2015-09-30_12-58_1025.fsa	P.PP.CC21.2F	316	B	136	136	135.85	135.85	1379	1379
21.3M_C04_Run_ABI3130_2015-09-30_12-58_1025.fsa	P.PP.CC21.3M	316	B	115	136	114.45	135.93	2042	570
21.4M_D04_Run_ABI3130_2015-09-30_12-58_1025.fsa	P.PP.CC21.4M	316	B	136	136	135.94	135.94	982	982
21.5M_E04_Run_ABI3130_2015-09-30_12-58_1025.fsa	P.PP.CC21.5M	316	B	136	136	135.92	135.92	1289	1289
22.10M_A07_Run_ABI3130_2015-09-30_12-58_1027.fsa	P.PP.CC22.10M	316	B	115	136	114.49	135.95	2559	760
22.1F_H05_Run_ABI3130_2015-09-30_12-58_1026.fsa	P.PP.CC22.1F	316	B	136	136	135.94	135.94	809	809
22.2F_A06_Run_ABI3130_2015-09-30_12-58_1026.fsa	P.PP.CC22.2F	316	B	136	136	135.94	135.94	1893	1893
22.3F_B06_Run_ABI3130_2015-09-30_12-58_1026.fsa	P.PP.CC22.3F	316	B	115	136	114.41	135.85	1555	465
22.4F_C06_Run_ABI3130_2015-09-30_12-58_1026.fsa	P.PP.CC22.4F	316	B	136	136	135.92	135.92	1269	1269
22.5M_D06_Run_ABI3130_2015-09-30_12-58_1026.fsa	P.PP.CC22.5M	316	B	136	136	135.95	135.95	710	710
22.6M_E06_Run_ABI3130_2015-09-30_12-58_1026.fsa	P.PP.CC22.6M	316	B	136	136	135.94	135.94	1367	1367
22.7M_F06_Run_ABI3130_2015-09-30_12-58_1026.fsa	P.PP.CC22.7M	316	B	115	136	114.45	135.93	1604	477
22.8M_G06_Run_ABI3130_2015-09-30_12-58_1026.fsa	P.PP.CC22.8M	316	B	115	136	114.51	135.95	746	249
22.9M_H06_Run_ABI3130_2015-09-30_12-58_1026.fsa	P.PP.CC22.9M	316	B	136	136	135.95	135.95	1118	1118
23.1M_E03_Run_ABI3130_2015-09-30_12-58_1025.fsa	P.PP.CC23.1M	316	B	115	136	114.44	135.94	1581	458
23.2M_F03_Run_ABI3130_2015-09-30_12-58_1025.fsa	P.PP.CC23.2M	316	B	136	136	135.92	135.92	1193	1193
23.3M_G03_Run_ABI3130_2015-09-30_12-58_1025.fsa	P.PP.CC23.3M	316	B	136	136	135.93	135.93	972	972
23.4M_H03_Run_ABI3130_2015-09-30_12-58_1025.fsa	P.PP.CC23.4M	316	B	136	136	135.91	135.91	706	706
26.1F_D09_Run_ABI3130_2015-09-30_12-58_1028.fsa	P.PP.CC26.1F	316	B	115	136	114.43	135.95	1304	367
26.2F_E09_Run_ABI3130_2015-09-30_12-58_1028.fsa	P.PP.CC26.2F	316	B	115	136	114.47	135.95	1225	362
26.3F_F09_Run_ABI3130_2015-09-30_12-58_1028.fsa	P.PP.CC26.3F	316	B	115	136	114.44	135.95	1224	377
26.4M_G09_Run_ABI3130_2015-09-30_12-58_1028.fsa	P.PP.CC26.4M	316	B	115	136	114.47	135.86	1716	481
30.1F_A11_Run_ABI3130_2015-09-30_12-58_1029.fsa	P.PP.CC30.1F	316	B	115	136	114.48	135.86	2335	666
30.2F_B11_Run_ABI3130_2015-09-30_12-58_1029.fsa	P.PP.CC30.2F	316	B	115	136	114.47	135.86	1513	446
30.3F_C11_Run_ABI3130_2015-09-30_12-58_1029.fsa	P.PP.CC30.3F	316	B	115	136	114.48	135.95	1415	416
30.4F_D11_Run_ABI3130_2015-09-30_12-58_1029.fsa	P.PP.CC30.4F	316	B	136	136	135.94	135.94	856	856
30.5F_E11_Run_ABI3130_2015-09-30_12-58_1029.fsa	P.PP.CC30.5F	316	B	115	136	114.55	135.98	1318	385
30.6M_F11_Run_ABI3130_2015-09-30_12-58_1029.fsa	P.PP.CC30.6M	316	B	115	136	114.52	136.05	1196	352
30.7M_G11_Run_ABI3130_2015-09-30_12-58_1029.fsa	P.PP.CC30.7M	316	B	115	136	114.57	135.97	1228	401
30.8M_H11_Run_ABI3130_2015-09-30_12-58_1029.fsa	P.PP.CC30.8M	316	B	115	136	114.5	135.96	1483	385
30.9M_A12_Run_ABI3130_2015-09-30_12-58_1029.fsa	P.PP.CC30.9M	316	B	115	136	114.49	135.96	2006	546
32.10M_G05_Run_ABI3130_2015-09-30_12-58_1026.fsa	P.PP.CC32.10M	316	B	136	136	136.04	136.04	787	787
32.1BF_B10_Run_ABI3130_2015-09-30_12-58_1028.fsa	P.PP.CC32.1BF	316	B	136	136	135.94	135.94	1013	1013
32.1F_F04_Run_ABI3130_2015-09-30_12-58_1025.fsa	P.PP.CC32.1F	316	B	115	136	114.43	135.92	1064	324
32.2BF_C10_Run_ABI3130_2015-09-30_12-58_1028.fsa	P.PP.CC32.2BF	316	B	136	136	135.86	135.86	1215	1215
32.2F_G04_Run_ABI3130_2015-09-30_12-58_1025.fsa	P.PP.CC32.2F	316	B	136	136	135.94	135.94	934	934
32.3BF_D10_Run_ABI3130_2015-09-30_12-58_1028.fsa	P.PP.CC32.3BF	316	B	136	136	135.86	135.86	829	829
32.3F_H04_Run_ABI3130_2015-09-30_12-58_1025.fsa	P.PP.CC32.3F	316	B	115	136	114.54	136.04	2096	626
32.4BM_E10_Run_ABI3130_2015-09-30_12-58_1028.fsa	P.PP.CC32.4BM	316	B	136	136	135.95	135.95	721	721
32.4F_A05_Run_ABI3130_2015-09-30_12-58_1026.fsa	P.PP.CC32.4F	316	B	136	136	135.94	135.94	1596	1596
32.5BM_F10_Run_ABI3130_2015-09-30_12-58_1028.fsa	P.PP.CC32.5BM	316	B	136	136	135.94	135.94	910	910
32.5F_B05_Run_ABI3130_2015-09-30_12-58_1026.fsa	P.PP.CC32.5F	316	B	115	136	114.49	135.93	782	261
32.6BM_G10_Run_ABI3130_2015-09-30_12-58_1028.fsa	P.PP.CC32.6BM	316	B	115	136	114.49	135.96	1050	297
32.6M_C05_Run_ABI3130_2015-09-30_12-58_1026.fsa	P.PP.CC32.6M	316	B	115	136	114.41	135.93	1572	467
32.7BM_H10_Run_ABI3130_2015-09-30_12-58_1028.fsa	P.PP.CC32.7BM	316	B	136	136	136.06	136.06	1048	1048
32.7M_D05_Run_ABI3130_2015-09-30_12-58_1026.fsa	P.PP.CC32.7M	316	B	136	136	135.96	135.96	1001	1001
32.8M_E05_Run_ABI3130_2015-09-30_12-58_1026.fsa	P.PP.CC32.8M	316	B	136	136	135.94	135.94	772	772
32.9M_F05_Run_ABI3130_2015-09-30_12-58_1026.fsa	P.PP.CC32.9M	316	B	136	136	135.94	135.94	1219	1219
33.1M_H09_Run_ABI3130_2015-09-30_12-58_1028.fsa	P.PP.CC33.1M	316	B	136	136	135.96	135.96	720	720
33.2M_A10_Run_ABI3130_2015-09-30_12-58_1028.fsa	P.PP.CC33.2M	316	B	136	136	135.86	135.86	1177	1177
34.1F_B12_Run_ABI3130_2015-09-30_12-58_1029.fsa	P.PP.CC34.1F	316	B	136	136	135.87	135.87	726	726
34.2F_C12_Run_ABI3130_2015-09-30_12-58_1029.fsa	P.PP.CC34.2F	316	B	115	136	114.46	135.96	1385	414
34.3F_D12_Run_ABI3130_2015-09-30_12-58_1029.fsa	P.PP.CC34.3F	316	B	115	136	114.51	135.97	976	281
34.4F_E12_Run_ABI3130_2015-09-30_12-58_1029.fsa	P.PP.CC34.4F	316	B	115	136	114.42	135.94	946	267
35.1F_C02_Run_ABI3130_2015-09-30_13-03_1030.fsa	P.PP.CC35.1F	316	B	136	136	135.97	135.97	651	651
35.2F_E02_Run_ABI3130_2015-09-30_13-03_1030.fsa	P.PP.CC35.2F	316	B	136	136	135.94	135.94	567	567
35.3F_D02_Run_ABI3130_2015-09-30_13-03_1030.fsa	P.PP.CC35.3F	316	B	136	136	135.96	135.96	498	498
35.4F_F02_Run_ABI3130_2015-09-30_13-03_1030.fsa	P.PP.CC35.4F	316	B	115	136	114.43	135.95	865	245
35.5F_G01_Run_ABI3130_2015-09-30_13-03_1030.fsa	P.PP.CC35.5F	316	B	136	136	135.95	135.95	814	814
35.6F_F01_Run_ABI3130_2015-09-30_13-03_1030.fsa	P.PP.CC35.6F	316	B	136	136	135.95	135.95	580	580
35.7F_A02_Run_ABI3130_2015-09-30_13-03_1030.fsa	P.PP.CC35.7F	316	B	136	136	135.95	135.95	866	866
35.8M_B02_Run_ABI3130_2015-09-30_13-03_1030.fsa	P.PP.CC35.8M	316	B	136	136	135.93	135.93	795	795
35.9M_H01_Run_ABI3130_2015-09-30_13-03_1030.fsa	P.PP.CC35.9M	316	B	136	136	135.96	135.96	615	615
36.1F_F12_Run_ABI3130_2015-09-30_12-58_1029.fsa	P.PP.CC36.1F	316	B	136	136	135.96	135.96	717	717
36.2F_A01_Run_ABI3130_2015-09-30_13-03_1030.fsa	P.PP.CC36.2F	316	B	115	136	114.49	135.96	2516	702
36.3M_B01_Run_ABI3130_2015-09-30_13-03_1030.fsa	P.PP.CC36.3M	316	B	115	136	114.49	135.96	1098	304
36.4M_C01_Run_ABI3130_2015-09-30_13-03_1030.fsa	P.PP.CC36.4M	316	B	115	136	114.43	135.92	1048	300
36.5M_D01_Run_ABI3130_2015-09-30_13-03_1030.fsa	P.PP.CC36.5M	316	B	115	136	114.54	135.96	1028	253
36.6M_E01_Run_ABI3130_2015-09-30_13-03_1030.fsa	P.PP.CC36.6M	316	B	136	136	135.95	135.95	609	609
36.7M_G02_Run_ABI3130_2015-09-30_13-03_1030.fsa	P.PP.CC36.7M	316	B	115	136	114.51	135.95	710	209
36.8M_H02_Run_ABI3130_2015-09-30_13-03_1030.fsa	P.PP.CC36.8M	316	B	136	136	135.98	135.98	377	377
37.1F_A03_Run_ABI3130_2015-09-30_18-42_1031.fsa	P.PP.CC37.1F	316	B	115	136	114.41	135.91	1809	500
37.2F_C03_Run_ABI3130_2015-09-30_18-42_1031.fsa	P.PP.CC37.2F	316	B	136	136	135.92	135.92	605	605
37.3F_B03_Run_ABI3130_2015-09-30_18-42_1031.fsa	P.PP.CC37.3F	316	B	115	136	114.51	136	702	215
37.4M_D03_Run_ABI3130_2015-09-30_18-42_1031.fsa	P.PP.CC37.4M	316	B	115	136	114.43	135.84	1290	357
37.5M_E03_Run_ABI3130_2015-09-30_18-42_1031.fsa	P.PP.CC37.5M	316	B	136	136	135.93	135.93	548	548
39.1F_E05_Run_ABI3130_2015-09-30_18-42_1032.fsa	P.PP.CC39.1F	316	B	115	136	114.48	135.93	1005	281
39.2M_F05_Run_ABI3130_2015-09-30_18-42_1032.fsa	P.PP.CC39.2M	316	B	136	136	136.02	136.02	817	817
39.3M_G05_Run_ABI3130_2015-09-30_18-42_1032.fsa	P.PP.CC39.3M	316	B	115	136	114.53	136.01	1425	385
39.4M_H05_Run_ABI3130_2015-09-30_18-42_1032.fsa	P.PP.CC39.4M	316	B	136	136	136.01	136.01	530	530
4.1F_G09_Run_ABI3130_2015-10-01_14-06_1042.fsa	P.PP.CC4.1F	316	B	136	136	136.04	136.04	597	597
4.2F_H09_Run_ABI3130_2015-10-01_14-06_1042.fsa	P.PP.CC4.2F	316	B	136	136	136.04	136.04	729	729
4.3F_A10_Run_ABI3130_2015-10-01_14-06_1042.fsa	P.PP.CC4.3F	316	B	115	136	114.53	135.94	1118	339
4.4F_B10_Run_ABI3130_2015-10-01_14-06_1042.fsa	P.PP.CC4.4F	316	B	136	136	135.94	135.94	313	313
4.5M_C10_Run_ABI3130_2015-10-01_14-06_1042.fsa	P.PP.CC4.5M	316	B	136	136	135.95	135.95	688	688
4.6M_D10_Run_ABI3130_2015-10-01_14-06_1042.fsa	P.PP.CC4.6M	316	B	115	136	114.5	135.95	968	252
4.7M_E10_Run_ABI3130_2015-10-01_14-06_1042.fsa	P.PP.CC4.7M	316	B	115	136	114.53	136.03	892	240
41.10M_B08_Run_ABI3130_2015-10-01_08-58_1034.fsa	P.PP.CC41.10M	316	B	136	136	135.87	135.87	588	588
41.11M_C08_Run_ABI3130_2015-10-01_08-58_1034.fsa	P.PP.CC41.11M	316	B	136	136	136.1	136.1	728	728
41.1F_D08_Run_ABI3130_2015-10-01_08-58_1034.fsa	P.PP.CC41.1F	316	B	136	136	136.05	136.05	598	598
41.2F_E08_Run_ABI3130_2015-10-01_08-58_1034.fsa	P.PP.CC41.2F	316	B	115	136	114.55	136.04	847	238
41.3F_F08_Run_ABI3130_2015-10-01_08-58_1034.fsa	P.PP.CC41.3F	316	B	115	136	114.51	136.02	775	204
41.4F_G08_Run_ABI3130_2015-10-01_08-58_1034.fsa	P.PP.CC41.4F	316	B	115	136	114.56	136.04	568	175
41.5F_H08_Run_ABI3130_2015-10-01_08-58_1034.fsa	P.PP.CC41.5F	316	B	136	136	136.07	136.07	664	664
41.6F_A09_Run_ABI3130_2015-10-01_10-01_1036.fsa	P.PP.CC41.6F	316	B	136	136	136	136	1062	1062
41.7F_G07_Run_ABI3130_2015-10-01_08-58_1034.fsa	P.PP.CC41.7F	316	B	136	136	136.05	136.05	886	886
41.8F_H07_Run_ABI3130_2015-10-01_08-58_1034.fsa	P.PP.CC41.8F	316	B	115	136	114.7	136.13	732	204
41.9M_A08_Run_ABI3130_2015-10-01_08-58_1034.fsa	P.PP.CC41.9M	316	B	136	136	136.05	136.05	1242	1242
42.10M_C05_Run_ABI3130_2015-09-30_18-42_1032.fsa	P.PP.CC42.10M	316	B	136	136	135.89	135.89	696	696
42.1F_C04_Run_ABI3130_2015-09-30_18-42_1031.fsa	P.PP.CC42.1F	316	B	115	136	114.54	135.94	1325	352
42.2F_D04_Run_ABI3130_2015-09-30_18-42_1031.fsa	P.PP.CC42.2F	316	B	115	136	114.46	136.02	911	252
42.3F_E04_Run_ABI3130_2015-09-30_18-42_1031.fsa	P.PP.CC42.3F	316	B	115	136	114.45	135.91	1082	286
42.4F_H04_Run_ABI3130_2015-09-30_18-42_1031.fsa	P.PP.CC42.4F	316	B	115	136	114.62	135.96	1359	290
42.5F_A05_Run_ABI3130_2015-09-30_18-42_1032.fsa	P.PP.CC42.5F	316	B	136	136	135.91	135.91	1676	1676
42.6F_B05_Run_ABI3130_2015-09-30_18-42_1032.fsa	P.PP.CC42.6F	316	B	115	136	114.43	135.91	1098	312
42.7M_F04_Run_ABI3130_2015-09-30_18-42_1031.fsa	P.PP.CC42.7M	316	B	115	136	114.46	135.91	931	248
42.8M_G04_Run_ABI3130_2015-09-30_18-42_1031.fsa	P.PP.CC42.8M	316	B	115	136	114.57	135.93	965	258
42.9M_D05_Run_ABI3130_2015-09-30_18-42_1032.fsa	P.PP.CC42.9M	316	B	115	136	114.52	135.92	1332	358
43.10M_C10_Run_ABI3130_2015-10-01_10-01_1036.fsa	P.PP.CC43.10M	316	B	136	136	136	136	759	759
43.1F_B09_Run_ABI3130_2015-10-01_10-01_1036.fsa	P.PP.CC43.1F	316	B	115	136	114.38	135.9	1081	280
43.2F_C09_Run_ABI3130_2015-10-01_10-01_1036.fsa	P.PP.CC43.2F	316	B	115	136	114.41	135.89	1232	330
43.3F_E09_Run_ABI3130_2015-10-01_10-01_1036.fsa	P.PP.CC43.3F	316	B	136	136	136.01	136.01	641	641
43.4F_D09_Run_ABI3130_2015-10-01_10-01_1036.fsa	P.PP.CC43.4F	316	B	115	136	114.56	135.92	389	138
43.5M_F09_Run_ABI3130_2015-10-01_10-01_1036.fsa	P.PP.CC43.5M	316	B	115	136	114.55	136.01	950	266
43.6M_G09_Run_ABI3130_2015-10-01_10-01_1036.fsa	P.PP.CC43.6M	316	B	136	136	136.09	136.09	719	719
43.7M_H09_Run_ABI3130_2015-10-01_10-01_1036.fsa	P.PP.CC43.7M	316	B	115	136	114.63	136.11	1044	252
43.8M_A10_Run_ABI3130_2015-10-01_10-01_1036.fsa	P.PP.CC43.8M	316	B	115	136	114.43	135.81	638	154
43.9M_B10_Run_ABI3130_2015-10-01_10-01_1036.fsa	P.PP.CC43.9M	316	B	115	136	114.39	135.9	919	235
44.1F_A06_Run_ABI3130_2015-09-30_18-42_1032.fsa	P.PP.CC44.1F	316	B	136	136	135.92	135.92	1616	1616
44.2F_B06_Run_ABI3130_2015-09-30_18-42_1032.fsa	P.PP.CC44.2F	316	B	136	136	135.92	135.92	800	800
44.3M_C06_Run_ABI3130_2015-09-30_18-42_1032.fsa	P.PP.CC44.3M	316	B	136	136	135.94	135.94	820	820
45.1F_E10_Run_ABI3130_2015-10-01_10-01_1036.fsa	P.PP.CC45.1F	316	B	136	136	136.01	136.01	679	679
45.2F_D10_Run_ABI3130_2015-10-01_10-01_1036.fsa	P.PP.CC45.2F	316	B	115	136	114.54	136.01	1132	301
45.3M_F10_Run_ABI3130_2015-10-01_10-01_1036.fsa	P.PP.CC45.3M	316	B	136	136	136	136	547	547
46.10F_E07_Run_ABI3130_2015-10-01_08-58_1034.fsa	P.PP.CC46.10F	316	B	115	136	114.57	136.05	814	231
46.11M_F07_Run_ABI3130_2015-10-01_08-58_1034.fsa	P.PP.CC46.11M	316	B	136	136	136.02	136.02	622	622
46.1F_D06_Run_ABI3130_2015-09-30_18-42_1032.fsa	P.PP.CC46.1F	316	B	136	136	135.93	135.93	649	649
46.2F_E06_Run_ABI3130_2015-09-30_18-42_1032.fsa	P.PP.CC46.2F	316	B	136	136	136	136	557	557
46.3M_F06_Run_ABI3130_2015-09-30_18-42_1032.fsa	P.PP.CC46.3M	316	B	115	136	114.58	136.1	852	241
46.4M_G06_Run_ABI3130_2015-09-30_18-42_1032.fsa	P.PP.CC46.4M	316	B	136	136	135.93	135.93	643	643
46.5M_H06_Run_ABI3130_2015-09-30_18-42_1032.fsa	P.PP.CC46.5M	316	B	115	136	114.59	136.05	1114	277
46.6M_A07_Run_ABI3130_2015-10-01_08-58_1034.fsa	P.PP.CC46.6M	316	B	136	136	135.96	135.96	1295	1295
46.7F_B07_Run_ABI3130_2015-10-01_08-58_1034.fsa	P.PP.CC46.7F	316	B	136	136	135.95	135.95	644	644
46.8F_C07_Run_ABI3130_2015-10-01_08-58_1034.fsa	P.PP.CC46.8F	316	B	115	136	114.56	136.04	1074	319
46.9M_D07_Run_ABI3130_2015-10-01_08-58_1034.fsa	P.PP.CC46.9M	316	B	115	136	114.56	135.96	803	234
47.1F_F03_Run_ABI3130_2015-09-30_18-42_1031.fsa	P.PP.CC47.1F	316	B	136	136	135.92	135.92	795	795
47.1F_G10_Run_ABI3130_2015-10-01_10-01_1036.fsa	P.PP.CC47.1F	316	B	115	136	114.51	135.92	877	240
47.2F_G03_Run_ABI3130_2015-09-30_18-42_1031.fsa	P.PP.CC47.2F	316	B	136	136	136	136	937	937
47.2F_H10_Run_ABI3130_2015-10-01_10-01_1036.fsa	P.PP.CC47.2F	316	B	115	136	114.66	136.04	1056	255
47.3F_A11_Run_ABI3130_2015-10-01_12-59_1037.fsa	P.PP.CC47.3F	316	B	136	136	135.98	135.98	1007	1007
47.3M_H03_Run_ABI3130_2015-09-30_18-42_1031.fsa	P.PP.CC47.3M	316	B	136	136	136.01	136.01	497	497
47.4F_B11_Run_ABI3130_2015-10-01_12-59_1037.fsa	P.PP.CC47.4F	316	B	136	136	135.9	135.9	707	707
47.4M_A04_Run_ABI3130_2015-09-30_18-42_1031.fsa	P.PP.CC47.4M	316	B	136	136	135.92	135.92	1458	1458
47.5F_C11_Run_ABI3130_2015-10-01_12-59_1037.fsa	P.PP.CC47.5F	316	B	115	136	114.53	135.99	1349	371
47.5M_B04_Run_ABI3130_2015-09-30_18-42_1031.fsa	P.PP.CC47.5M	316	B	115	136	114.35	135.82	1187	316
47.6M_E11_Run_ABI3130_2015-10-01_12-59_1037.fsa	P.PP.CC47.6M	316	B	115	136	114.5	136	964	259
47.7M_D11_Run_ABI3130_2015-10-01_12-59_1037.fsa	P.PP.CC47.7M	316	B	115	136	114.43	135.99	731	219
48.1F_F11_Run_ABI3130_2015-10-01_12-59_1037.fsa	P.PP.CC48.1F	316	B	115	136	114.55	136.01	988	258
48.2F_G11_Run_ABI3130_2015-10-01_12-59_1037.fsa	P.PP.CC48.2F	316	B	115	136	114.5	135.92	1219	327
48.3F_H11_Run_ABI3130_2015-10-01_12-59_1037.fsa	P.PP.CC48.3F	316	B	136	136	136.01	136.01	324	324
48.4F_B12_Run_ABI3130_2015-10-01_12-59_1037.fsa	P.PP.CC48.4F	316	B
48.5M_A12_Run_ABI3130_2015-10-01_12-59_1037.fsa	P.PP.CC48.5M	316	B	115	136	114.43	135.99	1094	302
48.6M_C12_Run_ABI3130_2015-10-01_12-59_1037.fsa	P.PP.CC48.6M	316	B	136	136	135.91	135.91	459	459
48.7M_D12_Run_ABI3130_2015-10-01_12-59_1037.fsa	P.PP.CC48.7M	316	B	115	136	114.51	136	858	199
48.8M_E12_Run_ABI3130_2015-10-01_12-59_1037.fsa	P.PP.CC48.8M	316	B	115	136	114.54	136	438	102
5.1F_F10_Run_ABI3130_2015-10-01_14-06_1042.fsa	P.PP.CC5.1F	316	B	115	136	114.55	136.03	854	234
5.2F_G10_Run_ABI3130_2015-10-01_14-06_1042.fsa	P.PP.CC5.2F	316	B	115	136	114.59	136.04	466	212
5.3M_H10_Run_ABI3130_2015-10-01_14-06_1042.fsa	P.PP.CC5.3M	316	B	115	136	114.62	136.06	1173	408
5.4M_A11_Run_ABI3130_2015-10-01_14-06_1043.fsa	P.PP.CC5.4M	316	B	136	136	136.03	136.03	1452	1452
5.5M_B11_Run_ABI3130_2015-10-01_14-06_1043.fsa	P.PP.CC5.5M	316	B	115	136	114.55	135.94	526	179
5.6M_C11_Run_ABI3130_2015-10-01_14-06_1043.fsa	P.PP.CC5.6M	316	B	115	136	114.42	135.93	944	302
5.7M_D11_Run_ABI3130_2015-10-01_14-06_1043.fsa	P.PP.CC5.7M	316	B	115	136	114.43	135.94	872	281
50.1F_B08_Run_ABI3130_2015-10-01_14-06_1041.fsa	P.PP.CC50.1F	316	B	136	136	135.92	135.92	612	612
50.2F_C08_Run_ABI3130_2015-10-01_14-06_1041.fsa	P.PP.CC50.2F	316	B	115	136	114.61	136.03	954	274
50.3F_D08_Run_ABI3130_2015-10-01_14-06_1041.fsa	P.PP.CC50.3F	316	B	136	136	136.03	136.03	407	407
51.1M_D07_Run_ABI3130_2015-10-01_14-06_1041.fsa	P.PP.CC51.1M	316	B	136	136	135.92	135.92	648	648
51.2M_E07_Run_ABI3130_2015-10-01_14-06_1041.fsa	P.PP.CC51.2M	316	B	136	136	136.04	136.04	575	575
51.3M_F07_Run_ABI3130_2015-10-01_14-06_1041.fsa	P.PP.CC51.3M	316	B	136	136	136.02	136.02	789	789
51.4M_G07_Run_ABI3130_2015-10-01_14-06_1041.fsa	P.PP.CC51.4M	316	B	136	136	136.02	136.02	736	736
51.5M_H07_Run_ABI3130_2015-10-01_14-06_1041.fsa	P.PP.CC51.5M	316	B	115	136	114.56	136.02	680	226
51.6M_A08_Run_ABI3130_2015-10-01_14-06_1041.fsa	P.PP.CC51.6M	316	B	136	136	136.01	136.01	797	797
52.1F_G06_Run_ABI3130_2015-10-01_14-06_1040.fsa	P.PP.CC52.1F	316	B	115	136	114.52	135.92	802	207
52.2F_H06_Run_ABI3130_2015-10-01_14-06_1040.fsa	P.PP.CC52.2F	316	B	115	136	114.56	136.04	1074	290
52.3M_A07_Run_ABI3130_2015-10-01_14-06_1041.fsa	P.PP.CC52.3M	316	B	115	136	114.47	135.92	1895	654
52.4M_B07_Run_ABI3130_2015-10-01_14-06_1041.fsa	P.PP.CC52.4M	316	B	115	136	114.46	135.92	1035	326
52.5M_C07_Run_ABI3130_2015-10-01_14-06_1041.fsa	P.PP.CC52.5M	316	B	136	136	135.9	135.9	598	598
54.1F_F12_Run_ABI3130_2015-10-01_12-59_1037.fsa	P.PP.CC54.1F	316	B	115	136	114.59	135.99	431	100
54.2F_B06_Run_ABI3130_2015-10-01_14-06_1040.fsa	P.PP.CC54.2F	316	B	136	136	136.01	136.01	615	615
54.3F_C06_Run_ABI3130_2015-10-01_14-06_1040.fsa	P.PP.CC54.3F	316	B	136	136	136.02	136.02	683	683
54.4M_D06_Run_ABI3130_2015-10-01_14-06_1040.fsa	P.PP.CC54.4M	316	B	115	136	114.49	136	722	213
54.5M_E06_Run_ABI3130_2015-10-01_14-06_1040.fsa	P.PP.CC54.5M	316	B	115	136	114.53	136.02	906	237
54.6M_F06_Run_ABI3130_2015-10-01_14-06_1040.fsa	P.PP.CC54.6M	316	B	136	136	136.01	136.01	466	466
6.1F_E11_Run_ABI3130_2015-10-01_14-06_1043.fsa	P.PP.CC6.1F	316	B	136	136	136.05	136.05	422	422
6.2F_F11_Run_ABI3130_2015-10-01_14-06_1043.fsa	P.PP.CC6.2F	316	B	115	136	114.55	135.94	717	222
6.3M_G11_Run_ABI3130_2015-10-01_14-06_1043.fsa	P.PP.CC6.3M	316	B	115	136	114.53	136.05	598	229
6.4M_H11_Run_ABI3130_2015-10-01_14-06_1043.fsa	P.PP.CC6.4M	316	B	115	136	114.56	136.04	652	200
6.5M_A12_Run_ABI3130_2015-10-01_14-06_1043.fsa	P.PP.CC6.5M	316	B	136	136	136.04	136.04	620	620
6.6M_B12_Run_ABI3130_2015-10-01_14-06_1043.fsa	P.PP.CC6.6M	316	B	115	136	114.49	135.95	494	177
6.7M_C12_Run_ABI3130_2015-10-01_14-06_1043.fsa	P.PP.CC6.7M	316	B	115	136	114.51	135.96	1056	318
61.1F_A01_Run_ABI3130_2015-10-01_14-06_1038.fsa	P.PP.CC61.1F	316	B	115	136	114.5	135.99	1492	463
61.2F_B01_Run_ABI3130_2015-10-01_14-06_1038.fsa	P.PP.CC61.2F	316	B	136	136	135.98	135.98	446	446
61.3F_C01_Run_ABI3130_2015-10-01_14-06_1038.fsa	P.PP.CC61.3F	316	B	115	136	114.41	135.97	612	232
61.4F_D01_Run_ABI3130_2015-10-01_14-06_1038.fsa	P.PP.CC61.4F	316	B	136	136	135.91	135.91	510	510
63.2M_E01_Run_ABI3130_2015-10-01_14-06_1038.fsa	P.PP.CC63.2M	316	B	136	136	136.01	136.01	430	430
63.3M_F01_Run_ABI3130_2015-10-01_14-06_1038.fsa	P.PP.CC63.3M	316	B	115	136	114.5	136	791	241
63.4M_G01_Run_ABI3130_2015-10-01_14-06_1038.fsa	P.PP.CC63.4M	316	B	115	136	114.56	136.01	539	186
65.1F_E03_Run_ABI3130_2015-10-01_14-06_1039.fsa	P.PP.CC65.1F	316	B
65.2F_F03_Run_ABI3130_2015-10-01_14-06_1039.fsa	P.PP.CC65.2F	316	B
65.3F_G03_Run_ABI3130_2015-10-01_14-06_1039.fsa	P.PP.CC65.3F	316	B	136	136	135.93	135.93	578	578
66.1F_H01_Run_ABI3130_2015-10-01_14-06_1038.fsa	P.PP.CC66.1F	316	B	136	136	136	136	540	540
66.2F_A02_Run_ABI3130_2015-10-01_14-06_1038.fsa	P.PP.CC66.2F	316	B
66.3F_B02_Run_ABI3130_2015-10-01_14-06_1038.fsa	P.PP.CC66.3F	316	B	136	136	136.01	136.01	830	830
66.4M_C02_Run_ABI3130_2015-10-01_14-06_1038.fsa	P.PP.CC66.4M	316	B	115	136	114.51	136	753	656
66.5M_D02_Run_ABI3130_2015-10-01_14-06_1038.fsa	P.PP.CC66.5M	316	B	136	136	136	136	1054	1054
67.1F_E02_Run_ABI3130_2015-10-01_14-06_1038.fsa	P.PP.CC67.1F	316	B	136	136	135.9	135.9	824	824
67.2F_F02_Run_ABI3130_2015-10-01_14-06_1038.fsa	P.PP.CC67.2F	316	B	115	136	114.6	136.09	557	535
67.3F_G02_Run_ABI3130_2015-10-01_14-06_1038.fsa	P.PP.CC67.3F	316	B	115	136	114.58	136	873	377
67.4F_H02_Run_ABI3130_2015-10-01_14-06_1038.fsa	P.PP.CC67.4F	316	B	115	136	114.51	136.02	159	746
67.5M_A03_Run_ABI3130_2015-10-01_14-06_1039.fsa	P.PP.CC67.5M	316	B
67.6M_B03_Run_ABI3130_2015-10-01_14-06_1039.fsa	P.PP.CC67.6M	316	B
67.7M_C03_Run_ABI3130_2015-10-01_14-06_1039.fsa	P.PP.CC67.7M	316	B
67.8M_D03_Run_ABI3130_2015-10-01_14-06_1039.fsa	P.PP.CC67.8M	316	B
9.1F_C03_Run_ABI3130_2015-09-30_12-58_1025.fsa	P.PP.CC9.1F	316	B	136	136	135.92	135.92	1244	1244
9.2F_D03_Run_ABI3130_2015-09-30_12-58_1025.fsa	P.PP.CC9.2F	316	B	136	136	135.93	135.93	1036	1036
9.3F_H02_Run_ABI3130_2015-09-30_12-58_1024.fsa	P.PP.CC9.3F	316	B	115	136	114.57	136.06	919	294
9.4F_A03_Run_ABI3130_2015-09-30_12-58_1025.fsa	P.PP.CC9.4F	316	B	136	136	135.93	135.93	1641	1641
9.5F_F02_Run_ABI3130_2015-09-30_12-58_1024.fsa	P.PP.CC9.5F	316	B	136	136	135.94	135.94	704	704
9.6F_G02_Run_ABI3130_2015-09-30_12-58_1024.fsa	P.PP.CC9.6F	316	B	136	136	136.04	136.04	720	720
9.7M_G04_Run_ABI3130_2015-10-01_14-06_1039.fsa	P.PP.CC9.7M	316	B	136	136	135.96	135.96	613	613
9.8M_F04_Run_ABI3130_2015-10-01_14-06_1039.fsa	P.PP.CC9.8M	316	B	136	136	135.87	135.87	687	687
9.9_H04_Run_ABI3130_2015-10-01_14-06_1039.fsa	P.PP.CC9.9M	316	B	115	136	114.67	136.08	1505	406
CC.PP21.1M_G12_Run_ABI3130_2015-09-30_12-58_1029.fsa	CC.PP21.1M	316	B	115	136	114.56	135.89	877	258
CC.PP21.1M_G12_Run_ABI3130_2015-10-01_12-59_1037.fsa	CC.PP21.1M	316	B	115	136	114.49	135.91	778	189
CC.PP21.1M_G12_Run_ABI3130_2015-10-01_14-06_1043.fsa	CC.PP21.1M	316	B	115	136	114.5	135.95	630	196
PPPP602M_B03_Run_ABI3130_2015-09-30_12-58_1025.fsa	PP.PP60.2M	316	B	136	136	135.84	135.84	681	681
neg._H12_Run_ABI3130_2015-10-01_14-06_1043.fsa	Negative control	316	B
neg.control_H12_Run_ABI3130_2015-09-30_12-58_1029.fsa	Negative control	316	B
1.1F_E08_Run_ABI3130_2015-10-01_14-06_1041.fsa	P.PP.CC1.1F	64	B	195	195	194.58	194.58	6304	6304
1.2F_F08_Run_ABI3130_2015-10-01_14-06_1041.fsa	P.PP.CC1.2F	64	B	195	195	194.57	194.57	5411	5411
1.3F_G08_Run_ABI3130_2015-10-01_14-06_1041.fsa	P.PP.CC1.3F	64	B	195	252	194.68	252.09	3479	238
1.4M_H08_Run_ABI3130_2015-10-01_14-06_1041.fsa	P.PP.CC1.4M	64	B	195	252	194.66	252.11	5641	416
1.5M_A09_Run_ABI3130_2015-10-01_14-06_1042.fsa	P.PP.CC1.5M	64	B	195	195	194.45	194.45	7267	7267
12.1F_E02_Run_ABI3130_2015-09-30_12-58_1024.fsa	P.PP.CC12.1F	64	B	195	195	194.71	194.71	7394	7394
12.2M_D02_Run_ABI3130_2015-09-30_12-58_1024.fsa	P.PP.CC12.2M	64	B	195	195	194.7	194.7	576	576
13.1F_D12_Run_ABI3130_2015-10-01_14-06_1043.fsa	P.PP.CC13.1F	64	B	195	195	194.56	194.56	6034	6034
13.2F_E12_Run_ABI3130_2015-10-01_14-06_1043.fsa	P.PP.CC13.2F	64	B	195	195	194.59	194.59	5133	5133
13.3F_F12_Run_ABI3130_2015-10-01_14-06_1043.fsa	P.PP.CC13.3F	64	B	195	195	194.66	194.66	5316	5316
14.10M_E04_Run_ABI3130_2015-10-01_14-06_1039.fsa	P.PP.CC14.10M	64	B	195	252	194.55	252.09	5616	411
14.5M_H03_Run_ABI3130_2015-10-01_14-06_1039.fsa	P.PP.CC14.5M	64	B	195	252	194.59	252.16	5077	377
14.6M_A04_Run_ABI3130_2015-10-01_14-06_1039.fsa	P.PP.CC14.6M	64	B	195	195	194.58	194.58	7050	7050
14.7M_B04_Run_ABI3130_2015-10-01_14-06_1039.fsa	P.PP.CC14.7M	64	B	195	195	194.53	194.53	7144	7144
14.8M_C04_Run_ABI3130_2015-10-01_14-06_1039.fsa	P.PP.CC14.8M	64	B	195	252	194.57	252.07	6231	461
14.9M_D04_Run_ABI3130_2015-10-01_14-06_1039.fsa	P.PP.CC14.9M	64	B	195	195	194.56	194.56	7426	7426
15.1F_B05_Run_ABI3130_2015-10-01_14-06_1040.fsa	P.PP.CC15.1F	64	B	195	195	194.51	194.51	7297	7297
15.2F_C05_Run_ABI3130_2015-10-01_14-06_1040.fsa	P.PP.CC15.2F	64	B	195	195	194.54	194.54	7216	7216
15.3F_D05_Run_ABI3130_2015-10-01_14-06_1040.fsa	P.PP.CC15.3F	64	B	195	252	194.57	252.11	4961	365
15.4F_E05_Run_ABI3130_2015-10-01_14-06_1040.fsa	P.PP.CC15.4F	64	B	195	195	194.58	194.58	7120	7120
15.5M_F05_Run_ABI3130_2015-10-01_14-06_1040.fsa	P.PP.CC15.5M	64	B	195	195	194.6	194.6	6829	6829
15.6M_G05_Run_ABI3130_2015-10-01_14-06_1040.fsa	P.PP.CC15.6M	64	B	195	252	194.57	252.08	6253	469
15.7M_H05_Run_ABI3130_2015-10-01_14-06_1040.fsa	P.PP.CC15.7M	64	B	195	195	194.7	194.7	6611	6611
16.1F_A01_Run_ABI3130_2015-09-30_12-58_1024.fsa	P.PP.CC16.1F	64	B	195	252	194.63	252.19	7046	892
16.2F_D01_Run_ABI3130_2015-09-30_12-58_1024.fsa	P.PP.CC16.2F	64	B	195	195	194.67	194.67	4547	4547
16.3F_E01_Run_ABI3130_2015-09-30_12-58_1024.fsa	P.PP.CC16.3F	64	B	195	195	194.66	194.66	3342	3342
16.4M_F01_Run_ABI3130_2015-09-30_12-58_1024.fsa	P.PP.CC16.4M	64	B	195	195	194.72	194.72	5119	5119
16.5M_G01_Run_ABI3130_2015-09-30_12-58_1024.fsa	P.PP.CC16.5M	64	B	195	252	194.66	252.21	4641	485
16.6M_H01_Run_ABI3130_2015-09-30_12-58_1024.fsa	P.PP.CC16.6M	64	B	195	252	194.64	252.19	3081	359
17.1F_A06_Run_ABI3130_2015-10-01_14-06_1040.fsa	P.PP.CC17.1F	64	B	195	195	194.4	194.4	7135	7135
17.2F_A05_Run_ABI3130_2015-10-01_14-06_1040.fsa	P.PP.CC17.2F	64	B	195	252	194.51	252.03	7270	847
17.3F_B01_Run_ABI3130_2015-09-30_12-58_1024.fsa	P.PP.CC17.3F	64	B	195	252	194.63	252.16	5397	531
17.4F_C01_Run_ABI3130_2015-09-30_12-58_1024.fsa	P.PP.CC17.4F	64	B	195	252	194.63	252.2	2572	338
17.5M_A02_Run_ABI3130_2015-09-30_12-58_1024.fsa	P.PP.CC17.5M	64	B	195	252	194.64	252.26	6274	712
17.6M_B02_Run_ABI3130_2015-09-30_12-58_1024.fsa	P.PP.CC17.6M	64	B	195	252	194.61	252.18	5425	502
17.7M_C02_Run_ABI3130_2015-09-30_12-58_1024.fsa	P.PP.CC17.7M	64	B	195	195	194.64	194.64	5853	5853
19.1F_D08_Run_ABI3130_2015-09-30_12-58_1027.fsa	P.PP.CC19.1F	64	B	195	252	194.66	252.16	5913	572
19.2F_E08_Run_ABI3130_2015-09-30_12-58_1027.fsa	P.PP.CC19.2F	64	B	195	195	194.53	194.53	6936	6936
19.3F_F08_Run_ABI3130_2015-09-30_12-58_1027.fsa	P.PP.CC19.3F	64	B	195	195	194.56	194.56	6254	6254
19.4F_G08_Run_ABI3130_2015-09-30_12-58_1027.fsa	P.PP.CC19.4F	64	B	195	252	194.63	252.22	5848	546
19.5F_H08_Run_ABI3130_2015-09-30_12-58_1027.fsa	P.PP.CC19.5F	64	B	195	252	194.68	252.11	7181	612
19.6M_A09_Run_ABI3130_2015-09-30_12-58_1028.fsa	P.PP.CC19.6M	64	B	195	195	194.4	194.4	7224	7224
19.7M_B09_Run_ABI3130_2015-09-30_12-58_1028.fsa	P.PP.CC19.7M	64	B	195	195	194.55	194.55	7182	7182
19.8M_C09_Run_ABI3130_2015-09-30_12-58_1028.fsa	P.PP.CC19.8M	64	B	195	195	194.56	194.56	7419	7419
2.1F_B09_Run_ABI3130_2015-10-01_14-06_1042.fsa	P.PP.CC2.1F	64	B	195	195	194.51	194.51	6563	6563
2.2F_C09_Run_ABI3130_2015-10-01_14-06_1042.fsa	P.PP.CC2.2F	64	B	195	252	194.61	252.07	5474	424
2.3F_D09_Run_ABI3130_2015-10-01_14-06_1042.fsa	P.PP.CC2.3F	64	B	195	252	194.6	252.2	4080	298
2.4F_E09_Run_ABI3130_2015-10-01_14-06_1042.fsa	P.PP.CC2.4F	64	B	195	195	194.56	194.56	5590	5590
2.5M_F09_Run_ABI3130_2015-10-01_14-06_1042.fsa	P.PP.CC2.5M	64	B	195	195	194.7	194.7	6569	6569
20.10M_C08_Run_ABI3130_2015-09-30_12-58_1027.fsa	P.PP.CC20.10M	64	B	195	252	194.56	252.04	7236	692
20.1F_B07_Run_ABI3130_2015-09-30_12-58_1027.fsa	P.PP.CC20.1F	64	B	195	195	194.46	194.46	7526	7526
20.2F_C07_Run_ABI3130_2015-09-30_12-58_1027.fsa	P.PP.CC20.2F	64	B	195	252	194.53	252.06	7149	653
20.3F_D07_Run_ABI3130_2015-09-30_12-58_1027.fsa	P.PP.CC20.3F	64	B	195	252	194.64	252.13	5374	499
20.4F_E07_Run_ABI3130_2015-09-30_12-58_1027.fsa	P.PP.CC20.4F	64	B	195	252	194.59	252.06	5914	549
20.5F_F07_Run_ABI3130_2015-09-30_12-58_1027.fsa	P.PP.CC20.5F	64	B	195	195	194.54	194.54	7782	7782
20.6F_G07_Run_ABI3130_2015-09-30_12-58_1027.fsa	P.PP.CC20.6F	64	B	195	195	194.56	194.56	7503	7503
20.7F_H07_Run_ABI3130_2015-09-30_12-58_1027.fsa	P.PP.CC20.7F	64	B	195	252	194.64	252.15	6614	594
20.8M_A08_Run_ABI3130_2015-09-30_12-58_1027.fsa	P.PP.CC20.8M	64	B	195	195	194.4	194.4	6989	6989
20.9M_B08_Run_ABI3130_2015-09-30_12-58_1027.fsa	P.PP.CC20.9M	64	B	195	195	194.58	194.58	7263	7263
21.1F_A04_Run_ABI3130_2015-09-30_12-58_1025.fsa	P.PP.CC21.1F	64	B	195	195	194.39	194.39	6987	6987
21.2F_B04_Run_ABI3130_2015-09-30_12-58_1025.fsa	P.PP.CC21.2F	64	B	195	195	194.45	194.45	7338	7338
21.3M_C04_Run_ABI3130_2015-09-30_12-58_1025.fsa	P.PP.CC21.3M	64	B	195	195	194.52	194.52	7524	7524
21.4M_D04_Run_ABI3130_2015-09-30_12-58_1025.fsa	P.PP.CC21.4M	64	B	195	252	194.56	252.2	4296	443
21.5M_E04_Run_ABI3130_2015-09-30_12-58_1025.fsa	P.PP.CC21.5M	64	B	195	195	194.57	194.57	7521	7521
22.10M_A07_Run_ABI3130_2015-09-30_12-58_1027.fsa	P.PP.CC22.10M	64	B	195	195	194.4	194.4	7154	7154
22.1F_H05_Run_ABI3130_2015-09-30_12-58_1026.fsa	P.PP.CC22.1F	64	B	195	252	194.6	252.1	5058	479
22.2F_A06_Run_ABI3130_2015-09-30_12-58_1026.fsa	P.PP.CC22.2F	64	B	195	195	194.32	194.32	6976	6976
22.3F_B06_Run_ABI3130_2015-09-30_12-58_1026.fsa	P.PP.CC22.3F	64	B	195	252	194.55	252.11	6259	607
22.4F_C06_Run_ABI3130_2015-09-30_12-58_1026.fsa	P.PP.CC22.4F	64	B	195	195	194.53	194.53	7524	7524
22.5M_D06_Run_ABI3130_2015-09-30_12-58_1026.fsa	P.PP.CC22.5M	64	B	195	252	194.63	252.21	4448	430
22.6M_E06_Run_ABI3130_2015-09-30_12-58_1026.fsa	P.PP.CC22.6M	64	B	195	195	194.56	194.56	7724	7724
22.7M_F06_Run_ABI3130_2015-09-30_12-58_1026.fsa	P.PP.CC22.7M	64	B	195	252	194.6	252.2	2599	255
22.8M_G06_Run_ABI3130_2015-09-30_12-58_1026.fsa	P.PP.CC22.8M	64	B	195	252	194.63	252.17	3253	384
22.9M_H06_Run_ABI3130_2015-09-30_12-58_1026.fsa	P.PP.CC22.9M	64	B	195	195	194.63	194.63	7274	7274
23.1M_E03_Run_ABI3130_2015-09-30_12-58_1025.fsa	P.PP.CC23.1M	64	B	195	252	194.64	252.07	7529	718
23.2M_F03_Run_ABI3130_2015-09-30_12-58_1025.fsa	P.PP.CC23.2M	64	B	195	252	194.6	252.1	7094	662
23.3M_G03_Run_ABI3130_2015-09-30_12-58_1025.fsa	P.PP.CC23.3M	64	B	195	252	194.61	252.18	7356	737
23.4M_H03_Run_ABI3130_2015-09-30_12-58_1025.fsa	P.PP.CC23.4M	64	B	195	195	194.59	194.59	7218	7218
26.1F_D09_Run_ABI3130_2015-09-30_12-58_1028.fsa	P.PP.CC26.1F	64	B	195	252	194.56	252.04	3858	373
26.2F_E09_Run_ABI3130_2015-09-30_12-58_1028.fsa	P.PP.CC26.2F	64	B	195	195	194.54	194.54	7588	7588
26.3F_F09_Run_ABI3130_2015-09-30_12-58_1028.fsa	P.PP.CC26.3F	64	B	195	252	194.56	252.09	5982	559
26.4M_G09_Run_ABI3130_2015-09-30_12-58_1028.fsa	P.PP.CC26.4M	64	B	195	252	194.56	252.08	5053	456
30.1F_A11_Run_ABI3130_2015-09-30_12-58_1029.fsa	P.PP.CC30.1F	64	B	195	252	194.56	252.13	7188	954
30.2F_B11_Run_ABI3130_2015-09-30_12-58_1029.fsa	P.PP.CC30.2F	64	B	195	195	194.48	194.48	7423	7423
30.3F_C11_Run_ABI3130_2015-09-30_12-58_1029.fsa	P.PP.CC30.3F	64	B	195	195	194.56	194.56	7350	7350
30.4F_D11_Run_ABI3130_2015-09-30_12-58_1029.fsa	P.PP.CC30.4F	64	B	195	195	194.59	194.59	7454	7454
30.5F_E11_Run_ABI3130_2015-09-30_12-58_1029.fsa	P.PP.CC30.5F	64	B	195	252	194.59	252.12	5787	557
30.6M_F11_Run_ABI3130_2015-09-30_12-58_1029.fsa	P.PP.CC30.6M	64	B	195	252	194.57	252.01	4609	488
30.7M_G11_Run_ABI3130_2015-09-30_12-58_1029.fsa	P.PP.CC30.7M	64	B	195	252	194.61	252.14	4644	487
30.8M_H11_Run_ABI3130_2015-09-30_12-58_1029.fsa	P.PP.CC30.8M	64	B	195	252	194.66	252.13	7122	647
30.9M_A12_Run_ABI3130_2015-09-30_12-58_1029.fsa	P.PP.CC30.9M	64	B	195	195	194.66	194.66	6987	6987
32.10M_G05_Run_ABI3130_2015-09-30_12-58_1026.fsa	P.PP.CC32.10M	64	B	195	195	194.56	194.56	7718	7718
32.1BF_B10_Run_ABI3130_2015-09-30_12-58_1028.fsa	P.PP.CC32.1BF	64	B	195	252	194.58	252.06	6468	654
32.1F_F04_Run_ABI3130_2015-09-30_12-58_1025.fsa	P.PP.CC32.1F	64	B	195	195	194.61	194.61	4759	4759
32.2BF_C10_Run_ABI3130_2015-09-30_12-58_1028.fsa	P.PP.CC32.2BF	64	B	195	252	194.46	252.06	7173	652
32.2F_G04_Run_ABI3130_2015-09-30_12-58_1025.fsa	P.PP.CC32.2F	64	B	195	195	194.53	194.53	5647	5647
32.3BF_D10_Run_ABI3130_2015-09-30_12-58_1028.fsa	P.PP.CC32.3BF	64	B	195	252	194.57	252.1	4662	462
32.3F_H04_Run_ABI3130_2015-09-30_12-58_1025.fsa	P.PP.CC32.3F	64	B	195	252	194.63	252.19	3691	372
32.4BM_E10_Run_ABI3130_2015-09-30_12-58_1028.fsa	P.PP.CC32.4BM	64	B	195	252	194.54	252.05	4574	485
32.4F_A05_Run_ABI3130_2015-09-30_12-58_1026.fsa	P.PP.CC32.4F	64	B	195	195	194.45	194.45	7165	7165
32.5BM_F10_Run_ABI3130_2015-09-30_12-58_1028.fsa	P.PP.CC32.5BM	64	B	195	195	194.6	194.6	6529	6529
32.5F_B05_Run_ABI3130_2015-09-30_12-58_1026.fsa	P.PP.CC32.5F	64	B	195	195	194.53	194.53	7412	7412
32.6BM_G10_Run_ABI3130_2015-09-30_12-58_1028.fsa	P.PP.CC32.6BM	64	B	195	252	194.64	252.12	4885	506
32.6M_C05_Run_ABI3130_2015-09-30_12-58_1026.fsa	P.PP.CC32.6M	64	B	195	195	194.55	194.55	7487	7487
32.7BM_H10_Run_ABI3130_2015-09-30_12-58_1028.fsa	P.PP.CC32.7BM	64	B	195	252	194.68	252.14	6914	659
32.7M_D05_Run_ABI3130_2015-09-30_12-58_1026.fsa	P.PP.CC32.7M	64	B	195	252	194.65	252.14	6314	566
32.8M_E05_Run_ABI3130_2015-09-30_12-58_1026.fsa	P.PP.CC32.8M	64	B	195	252	194.61	252.12	5556	531
32.9M_F05_Run_ABI3130_2015-09-30_12-58_1026.fsa	P.PP.CC32.9M	64	B	195	252	194.61	252.09	7401	746
33.1M_H09_Run_ABI3130_2015-09-30_12-58_1028.fsa	P.PP.CC33.1M	64	B	195	195	194.57	194.57	4968	4968
33.2M_A10_Run_ABI3130_2015-09-30_12-58_1028.fsa	P.PP.CC33.2M	64	B	195	195	194.5	194.5	7031	7031
34.1F_B12_Run_ABI3130_2015-09-30_12-58_1029.fsa	P.PP.CC34.1F	64	B	195	195	194.5	194.5	7306	7306
34.2F_C12_Run_ABI3130_2015-09-30_12-58_1029.fsa	P.PP.CC34.2F	64	B	195	195	194.57	194.57	7518	7518
34.3F_D12_Run_ABI3130_2015-09-30_12-58_1029.fsa	P.PP.CC34.3F	64	B	195	252	194.57	252.11	5471	499
34.4F_E12_Run_ABI3130_2015-09-30_12-58_1029.fsa	P.PP.CC34.4F	64	B	195	252	194.56	252.12	4386	358
35.1F_C02_Run_ABI3130_2015-09-30_13-03_1030.fsa	P.PP.CC35.1F	64	B	195	252	194.6	252.08	5194	534
35.2F_E02_Run_ABI3130_2015-09-30_13-03_1030.fsa	P.PP.CC35.2F	64	B	195	195	194.61	194.61	7235	7235
35.3F_D02_Run_ABI3130_2015-09-30_13-03_1030.fsa	P.PP.CC35.3F	64	B	195	195	194.56	194.56	6114	6114
35.4F_F02_Run_ABI3130_2015-09-30_13-03_1030.fsa	P.PP.CC35.4F	64	B	195	195	194.65	194.65	5576	5576
35.5F_G01_Run_ABI3130_2015-09-30_13-03_1030.fsa	P.PP.CC35.5F	64	B	195	252	194.61	252.11	5516	478
35.6F_F01_Run_ABI3130_2015-09-30_13-03_1030.fsa	P.PP.CC35.6F	64	B	195	252	194.62	252.11	4727	427
35.7F_A02_Run_ABI3130_2015-09-30_13-03_1030.fsa	P.PP.CC35.7F	64	B	195	195	194.72	194.72	7023	7023
35.8M_B02_Run_ABI3130_2015-09-30_13-03_1030.fsa	P.PP.CC35.8M	64	B	195	252	194.53	252.13	6829	604
35.9M_H01_Run_ABI3130_2015-09-30_13-03_1030.fsa	P.PP.CC35.9M	64	B	195	195	194.65	194.65	6927	6927
36.1F_F12_Run_ABI3130_2015-09-30_12-58_1029.fsa	P.PP.CC36.1F	64	B	195	252	194.66	252.12	4860	406
36.2F_A01_Run_ABI3130_2015-09-30_13-03_1030.fsa	P.PP.CC36.2F	64	B	195	195	194.35	194.35	7038	7038
36.3M_B01_Run_ABI3130_2015-09-30_13-03_1030.fsa	P.PP.CC36.3M	64	B	195	195	194.43	194.43	7427	7427
36.4M_C01_Run_ABI3130_2015-09-30_13-03_1030.fsa	P.PP.CC36.4M	64	B	195	252	194.51	252.05	6323	522
36.5M_D01_Run_ABI3130_2015-09-30_13-03_1030.fsa	P.PP.CC36.5M	64	B	195	252	194.61	252.17	4039	317
36.6M_E01_Run_ABI3130_2015-09-30_13-03_1030.fsa	P.PP.CC36.6M	64	B	195	195	194.63	194.63	6958	6958
36.7M_G02_Run_ABI3130_2015-09-30_13-03_1030.fsa	P.PP.CC36.7M	64	B	195	195	194.64	194.64	7021	7021
36.8M_H02_Run_ABI3130_2015-09-30_13-03_1030.fsa	P.PP.CC36.8M	64	B	195	252	194.71	252.17	5884	487
37.1F_A03_Run_ABI3130_2015-09-30_18-42_1031.fsa	P.PP.CC37.1F	64	B	195	195	194.56	194.56	7214	7214
37.2F_C03_Run_ABI3130_2015-09-30_18-42_1031.fsa	P.PP.CC37.2F	64	B	195	252	194.57	252.04	6523	592
37.3F_B03_Run_ABI3130_2015-09-30_18-42_1031.fsa	P.PP.CC37.3F	64	B	195	195	194.49	194.49	7434	7434
37.4M_D03_Run_ABI3130_2015-09-30_18-42_1031.fsa	P.PP.CC37.4M	64	B	195	195	194.6	194.6	6511	6511
37.5M_E03_Run_ABI3130_2015-09-30_18-42_1031.fsa	P.PP.CC37.5M	64	B	195	195	194.52	194.52	7884	7884
39.1F_E05_Run_ABI3130_2015-09-30_18-42_1032.fsa	P.PP.CC39.1F	64	B	195	195	194.6	194.6	7652	7652
39.2M_F05_Run_ABI3130_2015-09-30_18-42_1032.fsa	P.PP.CC39.2M	64	B	195	252	194.52	252.09	6111	514
39.3M_G05_Run_ABI3130_2015-09-30_18-42_1032.fsa	P.PP.CC39.3M	64	B	195	252	194.6	252.07	3717	294
39.4M_H05_Run_ABI3130_2015-09-30_18-42_1032.fsa	P.PP.CC39.4M	64	B	195	252	194.65	252.19	6103	430
4.1F_G09_Run_ABI3130_2015-10-01_14-06_1042.fsa	P.PP.CC4.1F	64	B	195	252	194.66	252.2	4227	288
4.2F_H09_Run_ABI3130_2015-10-01_14-06_1042.fsa	P.PP.CC4.2F	64	B	195	252	194.63	252.1	4103	295
4.3F_A10_Run_ABI3130_2015-10-01_14-06_1042.fsa	P.PP.CC4.3F	64	B	195	195	194.53	194.53	7178	7178
4.4F_B10_Run_ABI3130_2015-10-01_14-06_1042.fsa	P.PP.CC4.4F	64	B	195	195	194.56	194.56	5529	5529
4.5M_C10_Run_ABI3130_2015-10-01_14-06_1042.fsa	P.PP.CC4.5M	64	B	195	252	194.56	252.03	4569	325
4.6M_D10_Run_ABI3130_2015-10-01_14-06_1042.fsa	P.PP.CC4.6M	64	B	195	252	194.63	252.18	4205	287
4.7M_E10_Run_ABI3130_2015-10-01_14-06_1042.fsa	P.PP.CC4.7M	64	B	195	252	194.61	252.11	3581	290
41.10M_B08_Run_ABI3130_2015-10-01_08-58_1034.fsa	P.PP.CC41.10M	64	B	195	195	194.7	194.7	7393	7393
41.11M_C08_Run_ABI3130_2015-10-01_08-58_1034.fsa	P.PP.CC41.11M	64	B	195	252	194.72	252.2	5829	414
41.1F_D08_Run_ABI3130_2015-10-01_08-58_1034.fsa	P.PP.CC41.1F	64	B	195	252	194.66	252.27	6261	529
41.2F_E08_Run_ABI3130_2015-10-01_08-58_1034.fsa	P.PP.CC41.2F	64	B	195	195	194.75	194.75	5860	5860
41.3F_F08_Run_ABI3130_2015-10-01_08-58_1034.fsa	P.PP.CC41.3F	64	B	195	252	194.72	252.31	5513	476
41.4F_G08_Run_ABI3130_2015-10-01_08-58_1034.fsa	P.PP.CC41.4F	64	B	195	195	194.8	194.8	7771	7771
41.5F_H08_Run_ABI3130_2015-10-01_08-58_1034.fsa	P.PP.CC41.5F	64	B	195	252	194.87	252.39	7213	563
41.6F_A09_Run_ABI3130_2015-10-01_10-01_1036.fsa	P.PP.CC41.6F	64	B	195	252	194.57	252.12	7164	1015
41.7F_G07_Run_ABI3130_2015-10-01_08-58_1034.fsa	P.PP.CC41.7F	64	B	195	252	194.72	252.32	7490	712
41.8F_H07_Run_ABI3130_2015-10-01_08-58_1034.fsa	P.PP.CC41.8F	64	B	195	252	194.8	252.29	4517	341
41.9M_A08_Run_ABI3130_2015-10-01_08-58_1034.fsa	P.PP.CC41.9M	64	B	195	195	194.5	194.5	7126	7126
42.10M_C05_Run_ABI3130_2015-09-30_18-42_1032.fsa	P.PP.CC42.10M	64	B	195	195	194.46	194.46	7328	7328
42.1F_C04_Run_ABI3130_2015-09-30_18-42_1031.fsa	P.PP.CC42.1F	64	B	195	252	194.52	252.12	7262	613
42.2F_D04_Run_ABI3130_2015-09-30_18-42_1031.fsa	P.PP.CC42.2F	64	B	195	252	194.64	252.1	5381	473
42.3F_E04_Run_ABI3130_2015-09-30_18-42_1031.fsa	P.PP.CC42.3F	64	B	195	195	194.57	194.57	7689	7689
42.4F_H04_Run_ABI3130_2015-09-30_18-42_1031.fsa	P.PP.CC42.4F	64	B	195	195	194.74	194.74	7500	7500
42.5F_A05_Run_ABI3130_2015-09-30_18-42_1032.fsa	P.PP.CC42.5F	64	B	195	252	194.65	252.14	7142	922
42.6F_B05_Run_ABI3130_2015-09-30_18-42_1032.fsa	P.PP.CC42.6F	64	B	195	195	194.52	194.52	7457	7457
42.7M_F04_Run_ABI3130_2015-09-30_18-42_1031.fsa	P.PP.CC42.7M	64	B	195	252	194.61	252.12	5528	427
42.8M_G04_Run_ABI3130_2015-09-30_18-42_1031.fsa	P.PP.CC42.8M	64	B	195	195	194.53	194.53	7607	7607
42.9M_D05_Run_ABI3130_2015-09-30_18-42_1032.fsa	P.PP.CC42.9M	64	B	195	252	194.59	252.1	6088	477
43.10M_C10_Run_ABI3130_2015-10-01_10-01_1036.fsa	P.PP.CC43.10M	64	B	195	252	194.65	252.14	7231	625
43.1F_B09_Run_ABI3130_2015-10-01_10-01_1036.fsa	P.PP.CC43.1F	64	B	195	252	194.65	252.13	7201	605
43.2F_C09_Run_ABI3130_2015-10-01_10-01_1036.fsa	P.PP.CC43.2F	64	B	195	195	194.62	194.62	7522	7522
43.3F_E09_Run_ABI3130_2015-10-01_10-01_1036.fsa	P.PP.CC43.3F	64	B	195	252	194.63	252.23	5540	477
43.4F_D09_Run_ABI3130_2015-10-01_10-01_1036.fsa	P.PP.CC43.4F	64	B	195	195	194.68	194.68	7382	7382
43.5M_F09_Run_ABI3130_2015-10-01_10-01_1036.fsa	P.PP.CC43.5M	64	B	195	252	194.58	252.14	6694	573
43.6M_G09_Run_ABI3130_2015-10-01_10-01_1036.fsa	P.PP.CC43.6M	64	B	195	195	194.66	194.66	7687	7687
43.7M_H09_Run_ABI3130_2015-10-01_10-01_1036.fsa	P.PP.CC43.7M	64	B	195	252	194.69	252.17	5842	436
43.8M_A10_Run_ABI3130_2015-10-01_10-01_1036.fsa	P.PP.CC43.8M	64	B	195	195	194.47	194.47	6919	6919
43.9M_B10_Run_ABI3130_2015-10-01_10-01_1036.fsa	P.PP.CC43.9M	64	B	195	252	194.57	252.15	6962	561
44.1F_A06_Run_ABI3130_2015-09-30_18-42_1032.fsa	P.PP.CC44.1F	64	B	195	252	194.42	252.12	6981	1079
44.2F_B06_Run_ABI3130_2015-09-30_18-42_1032.fsa	P.PP.CC44.2F	64	B	195	252	194.57	252.14	7295	722
44.3M_C06_Run_ABI3130_2015-09-30_18-42_1032.fsa	P.PP.CC44.3M	64	B	195	252	194.6	252.12	7367	657
45.1F_E10_Run_ABI3130_2015-10-01_10-01_1036.fsa	P.PP.CC45.1F	64	B	195	252	194.58	252.15	5614	491
45.2F_D10_Run_ABI3130_2015-10-01_10-01_1036.fsa	P.PP.CC45.2F	64	B	195	195	194.61	194.61	7696	7696
45.3M_F10_Run_ABI3130_2015-10-01_10-01_1036.fsa	P.PP.CC45.3M	64	B	195	195	194.57	194.57	7404	7404
46.10F_E07_Run_ABI3130_2015-10-01_08-58_1034.fsa	P.PP.CC46.10F	64	B	195	252	194.66	252.28	6097	541
46.11M_F07_Run_ABI3130_2015-10-01_08-58_1034.fsa	P.PP.CC46.11M	64	B	195	195	194.66	194.66	7734	7734
46.1F_D06_Run_ABI3130_2015-09-30_18-42_1032.fsa	P.PP.CC46.1F	64	B	195	252	194.55	252.1	6789	578
46.2F_E06_Run_ABI3130_2015-09-30_18-42_1032.fsa	P.PP.CC46.2F	64	B	195	195	194.58	194.58	7562	7562
46.3M_F06_Run_ABI3130_2015-09-30_18-42_1032.fsa	P.PP.CC46.3M	64	B	195	252	194.65	252.17	6275	512
46.4M_G06_Run_ABI3130_2015-09-30_18-42_1032.fsa	P.PP.CC46.4M	64	B	195	195	194.6	194.6	7402	7402
46.5M_H06_Run_ABI3130_2015-09-30_18-42_1032.fsa	P.PP.CC46.5M	64	B	195	195	194.72	194.72	7521	7521
46.6M_A07_Run_ABI3130_2015-10-01_08-58_1034.fsa	P.PP.CC46.6M	64	B	195	195	194.48	194.48	7150	7150
46.7F_B07_Run_ABI3130_2015-10-01_08-58_1034.fsa	P.PP.CC46.7F	64	B	195	195	194.63	194.63	7389	7389
46.8F_C07_Run_ABI3130_2015-10-01_08-58_1034.fsa	P.PP.CC46.8F	64	B	195	252	194.72	252.29	7225	667
46.9M_D07_Run_ABI3130_2015-10-01_08-58_1034.fsa	P.PP.CC46.9M	64	B	195	195	194.72	194.72	7363	7363
47.1F_F03_Run_ABI3130_2015-09-30_18-42_1031.fsa	P.PP.CC47.1F	64	B	195	252	194.62	252.13	7424	615
47.1F_G10_Run_ABI3130_2015-10-01_10-01_1036.fsa	P.PP.CC47.1F	64	B	195	195	194.68	194.68	7615	7615
47.2F_G03_Run_ABI3130_2015-09-30_18-42_1031.fsa	P.PP.CC47.2F	64	B	195	195	194.67	194.67	7766	7766
47.2F_H10_Run_ABI3130_2015-10-01_10-01_1036.fsa	P.PP.CC47.2F	64	B	195	195	194.79	194.79	7364	7364
47.3F_A11_Run_ABI3130_2015-10-01_12-59_1037.fsa	P.PP.CC47.3F	64	B	195	195	194.49	194.49	7223	7223
47.3M_H03_Run_ABI3130_2015-09-30_18-42_1031.fsa	P.PP.CC47.3M	64	B	195	252	194.58	252.09	5212	388
47.4F_B11_Run_ABI3130_2015-10-01_12-59_1037.fsa	P.PP.CC47.4F	64	B	195	252	194.55	252.14	5307	458
47.4M_A04_Run_ABI3130_2015-09-30_18-42_1031.fsa	P.PP.CC47.4M	64	B	195	195	194.41	194.41	7042	7042
47.5F_C11_Run_ABI3130_2015-10-01_12-59_1037.fsa	P.PP.CC47.5F	64	B	195	252	194.62	252.13	7268	704
47.5M_B04_Run_ABI3130_2015-09-30_18-42_1031.fsa	P.PP.CC47.5M	64	B	195	252	194.57	252.13	7084	625
47.6M_E11_Run_ABI3130_2015-10-01_12-59_1037.fsa	P.PP.CC47.6M	64	B	195	195	194.63	194.63	4942	4942
47.7M_D11_Run_ABI3130_2015-10-01_12-59_1037.fsa	P.PP.CC47.7M	64	B	195	195	194.64	194.64	6158	6158
48.1F_F11_Run_ABI3130_2015-10-01_12-59_1037.fsa	P.PP.CC48.1F	64	B	195	195	194.65	194.65	6991	6991
48.2F_G11_Run_ABI3130_2015-10-01_12-59_1037.fsa	P.PP.CC48.2F	64	B	195	252	194.65	252.15	6546	536
48.3F_H11_Run_ABI3130_2015-10-01_12-59_1037.fsa	P.PP.CC48.3F	64	B	195	195	194.68	194.68	6130	6130
48.4F_B12_Run_ABI3130_2015-10-01_12-59_1037.fsa	P.PP.CC48.4F	64	B	195	195	194.67	194.67	7281	7281
48.5M_A12_Run_ABI3130_2015-10-01_12-59_1037.fsa	P.PP.CC48.5M	64	B	195	252	194.65	252.19	6801	714
48.6M_C12_Run_ABI3130_2015-10-01_12-59_1037.fsa	P.PP.CC48.6M	64	B	195	195	194.65	194.65	7355	7355
48.7M_D12_Run_ABI3130_2015-10-01_12-59_1037.fsa	P.PP.CC48.7M	64	B	195	252	194.6	252.09	5185	417
48.8M_E12_Run_ABI3130_2015-10-01_12-59_1037.fsa	P.PP.CC48.8M	64	B	195	252	194.68	252.2	4619	367
5.1F_F10_Run_ABI3130_2015-10-01_14-06_1042.fsa	P.PP.CC5.1F	64	B	195	252	194.6	252.05	3945	279
5.2F_G10_Run_ABI3130_2015-10-01_14-06_1042.fsa	P.PP.CC5.2F	64	B	195	195	194.61	194.61	3762	3762
5.3M_H10_Run_ABI3130_2015-10-01_14-06_1042.fsa	P.PP.CC5.3M	64	B	195	195	194.74	194.74	7478	7478
5.4M_A11_Run_ABI3130_2015-10-01_14-06_1043.fsa	P.PP.CC5.4M	64	B	195	195	194.46	194.46	7318	7318
5.5M_B11_Run_ABI3130_2015-10-01_14-06_1043.fsa	P.PP.CC5.5M	64	B	195	252	194.63	252.09	4179	297
5.6M_C11_Run_ABI3130_2015-10-01_14-06_1043.fsa	P.PP.CC5.6M	64	B	195	195	194.64	194.64	6143	6143
5.7M_D11_Run_ABI3130_2015-10-01_14-06_1043.fsa	P.PP.CC5.7M	64	B	195	252	194.61	252.15	4006	291
50.1F_B08_Run_ABI3130_2015-10-01_14-06_1041.fsa	P.PP.CC50.1F	64	B	195	195	194.59	194.59	6511	6511
50.2F_C08_Run_ABI3130_2015-10-01_14-06_1041.fsa	P.PP.CC50.2F	64	B	195	252	194.53	252.05	5683	445
50.3F_D08_Run_ABI3130_2015-10-01_14-06_1041.fsa	P.PP.CC50.3F	64	B	195	252	194.56	252.11	4240	317
51.1M_D07_Run_ABI3130_2015-10-01_14-06_1041.fsa	P.PP.CC51.1M	64	B	195	195	194.6	194.6	5979	5979
51.2M_E07_Run_ABI3130_2015-10-01_14-06_1041.fsa	P.PP.CC51.2M	64	B	195	195	194.63	194.63	6157	6157
51.3M_F07_Run_ABI3130_2015-10-01_14-06_1041.fsa	P.PP.CC51.3M	64	B	195	252	194.6	251.98	5668	413
51.4M_G07_Run_ABI3130_2015-10-01_14-06_1041.fsa	P.PP.CC51.4M	64	B	195	252	194.61	252.03	7070	529
51.5M_H07_Run_ABI3130_2015-10-01_14-06_1041.fsa	P.PP.CC51.5M	64	B	195	195	194.68	194.68	4958	4958
51.6M_A08_Run_ABI3130_2015-10-01_14-06_1041.fsa	P.PP.CC51.6M	64	B	195	195	194.5	194.5	7109	7109
52.1F_G06_Run_ABI3130_2015-10-01_14-06_1040.fsa	P.PP.CC52.1F	64	B	195	252	194.58	252.16	3911	260
52.2F_H06_Run_ABI3130_2015-10-01_14-06_1040.fsa	P.PP.CC52.2F	64	B	195	252	194.64	252.13	5218	354
52.3M_A07_Run_ABI3130_2015-10-01_14-06_1041.fsa	P.PP.CC52.3M	64	B	195	195	194.52	194.52	7208	7208
52.4M_B07_Run_ABI3130_2015-10-01_14-06_1041.fsa	P.PP.CC52.4M	64	B	195	252	194.57	252.04	4468	330
52.5M_C07_Run_ABI3130_2015-10-01_14-06_1041.fsa	P.PP.CC52.5M	64	B	195	252	194.58	251.98	4615	343
54.1F_F12_Run_ABI3130_2015-10-01_12-59_1037.fsa	P.PP.CC54.1F	64	B	195	195	194.62	194.62	3998	3998
54.2F_B06_Run_ABI3130_2015-10-01_14-06_1040.fsa	P.PP.CC54.2F	64	B	195	195	194.5	194.5	5195	5195
54.3F_C06_Run_ABI3130_2015-10-01_14-06_1040.fsa	P.PP.CC54.3F	64	B	195	252	194.53	252.09	4099	285
54.4M_D06_Run_ABI3130_2015-10-01_14-06_1040.fsa	P.PP.CC54.4M	64	B	195	252	194.58	252.14	2802	216
54.5M_E06_Run_ABI3130_2015-10-01_14-06_1040.fsa	P.PP.CC54.5M	64	B	195	252	194.6	252.08	4186	287
54.6M_F06_Run_ABI3130_2015-10-01_14-06_1040.fsa	P.PP.CC54.6M	64	B	195	195	194.65	194.65	4467	4467
6.1F_E11_Run_ABI3130_2015-10-01_14-06_1043.fsa	P.PP.CC6.1F	64	B	195	195	194.64	194.64	4134	4134
6.2F_F11_Run_ABI3130_2015-10-01_14-06_1043.fsa	P.PP.CC6.2F	64	B	195	195	194.63	194.63	4165	4165
6.3M_G11_Run_ABI3130_2015-10-01_14-06_1043.fsa	P.PP.CC6.3M	64	B	195	195	194.69	194.69	5136	5136
6.4M_H11_Run_ABI3130_2015-10-01_14-06_1043.fsa	P.PP.CC6.4M	64	B	195	195	194.63	194.63	5174	5174
6.5M_A12_Run_ABI3130_2015-10-01_14-06_1043.fsa	P.PP.CC6.5M	64	B	195	252	194.64	252.07	4253	345
6.6M_B12_Run_ABI3130_2015-10-01_14-06_1043.fsa	P.PP.CC6.6M	64	B	195	195	194.59	194.59	5353	5353
6.7M_C12_Run_ABI3130_2015-10-01_14-06_1043.fsa	P.PP.CC6.7M	64	B	195	195	194.64	194.64	6488	6488
61.1F_A01_Run_ABI3130_2015-10-01_14-06_1038.fsa	P.PP.CC61.1F	64	B	195	252	194.64	252.15	5969	506
61.2F_B01_Run_ABI3130_2015-10-01_14-06_1038.fsa	P.PP.CC61.2F	64	B	195	252	194.6	252.1	2188	217
61.3F_C01_Run_ABI3130_2015-10-01_14-06_1038.fsa	P.PP.CC61.3F	64	B	195	195	194.62	194.62	4396	4396
61.4F_D01_Run_ABI3130_2015-10-01_14-06_1038.fsa	P.PP.CC61.4F	64	B	195	252	194.68	252.17	2856	232
63.2M_E01_Run_ABI3130_2015-10-01_14-06_1038.fsa	P.PP.CC63.2M	64	B	195	252	194.66	252.17	2664	218
63.3M_F01_Run_ABI3130_2015-10-01_14-06_1038.fsa	P.PP.CC63.3M	64	B	195	195	194.63	194.63	5027	5027
63.4M_G01_Run_ABI3130_2015-10-01_14-06_1038.fsa	P.PP.CC63.4M	64	B	195	252	194.65	252.21	2822	257
65.1F_E03_Run_ABI3130_2015-10-01_14-06_1039.fsa	P.PP.CC65.1F	64	B	195	195	194.56	194.56	5983	5983
65.2F_F03_Run_ABI3130_2015-10-01_14-06_1039.fsa	P.PP.CC65.2F	64	B	195	252	194.61	252.11	4230	310
65.3F_G03_Run_ABI3130_2015-10-01_14-06_1039.fsa	P.PP.CC65.3F	64	B	195	195	194.63	194.63	5900	5900
66.1F_H01_Run_ABI3130_2015-10-01_14-06_1038.fsa	P.PP.CC66.1F	64	B	195	252	194.65	252.2	4202	299
66.2F_A02_Run_ABI3130_2015-10-01_14-06_1038.fsa	P.PP.CC66.2F	64	B	195	252	194.65	252.2	5477	465
66.3F_B02_Run_ABI3130_2015-10-01_14-06_1038.fsa	P.PP.CC66.3F	64	B	195	195	194.58	194.58	6718	6718
66.4M_C02_Run_ABI3130_2015-10-01_14-06_1038.fsa	P.PP.CC66.4M	64	B	195	195	194.65	194.65	7417	7417
66.5M_D02_Run_ABI3130_2015-10-01_14-06_1038.fsa	P.PP.CC66.5M	64	B	195	252	194.57	252.21	5796	421
67.1F_E02_Run_ABI3130_2015-10-01_14-06_1038.fsa	P.PP.CC67.1F	64	B	195	252	194.65	252.15	4503	339
67.2F_F02_Run_ABI3130_2015-10-01_14-06_1038.fsa	P.PP.CC67.2F	64	B	195	252	194.63	252.16	4717	340
67.3F_G02_Run_ABI3130_2015-10-01_14-06_1038.fsa	P.PP.CC67.3F	64	B	195	252	194.72	252.23	5072	388
67.4F_H02_Run_ABI3130_2015-10-01_14-06_1038.fsa	P.PP.CC67.4F	64	B	195	252	194.69	252.25	5848	436
67.5M_A03_Run_ABI3130_2015-10-01_14-06_1039.fsa	P.PP.CC67.5M	64	B	195	252	194.49	252.05	7160	748
67.6M_B03_Run_ABI3130_2015-10-01_14-06_1039.fsa	P.PP.CC67.6M	64	B	195	252	194.58	252.09	4789	354
67.7M_C03_Run_ABI3130_2015-10-01_14-06_1039.fsa	P.PP.CC67.7M	64	B	195	252	194.53	252.06	5143	388
67.8M_D03_Run_ABI3130_2015-10-01_14-06_1039.fsa	P.PP.CC67.8M	64	B	195	195	194.59	194.59	6153	6153
9.1F_C03_Run_ABI3130_2015-09-30_12-58_1025.fsa	P.PP.CC9.1F	64	B	195	252	194.5	252.07	7306	760
9.2F_D03_Run_ABI3130_2015-09-30_12-58_1025.fsa	P.PP.CC9.2F	64	B	195	195	194.55	194.55	7484	7484
9.3F_H02_Run_ABI3130_2015-09-30_12-58_1024.fsa	P.PP.CC9.3F	64	B	195	195	194.71	194.71	2294	2294
9.4F_A03_Run_ABI3130_2015-09-30_12-58_1025.fsa	P.PP.CC9.4F	64	B	195	252	194.56	252.08	6325	596
9.5F_F02_Run_ABI3130_2015-09-30_12-58_1024.fsa	P.PP.CC9.5F	64	B	195	195	194.71	194.71	6432	6432
9.6F_G02_Run_ABI3130_2015-09-30_12-58_1024.fsa	P.PP.CC9.6F	64	B	195	195	194.63	194.63	7646	7646
9.7M_G04_Run_ABI3130_2015-10-01_14-06_1039.fsa	P.PP.CC9.7M	64	B	195	195	194.64	194.64	6324	6324
9.8M_F04_Run_ABI3130_2015-10-01_14-06_1039.fsa	P.PP.CC9.8M	64	B	195	252	194.69	252.15	4065	290
9.9_H04_Run_ABI3130_2015-10-01_14-06_1039.fsa	P.PP.CC9.9M	64	B	195	252	194.7	252.13	6781	483
CC.PP21.1M_G12_Run_ABI3130_2015-09-30_12-58_1029.fsa	CC.PP21.1M	64	B	195	252	194.64	252.16	4234	429
CC.PP21.1M_G12_Run_ABI3130_2015-10-01_12-59_1037.fsa	CC.PP21.1M	64	B	195	252	194.63	252.23	5179	446
CC.PP21.1M_G12_Run_ABI3130_2015-10-01_14-06_1043.fsa	CC.PP21.1M	64	B	195	252	194.64	252.22	3708	243
PPPP602M_B03_Run_ABI3130_2015-09-30_12-58_1025.fsa	PP.PP60.2M	64	B	195	195	194.5	194.5	4309	4309
neg._H12_Run_ABI3130_2015-10-01_14-06_1043.fsa	Negative control	64	B
neg.control_H12_Run_ABI3130_2015-09-30_12-58_1029.fsa	Negative control	64	B
