# Supplementary material
Source: publisher figshare collection journal article supplement (https://gsajournals.figshare.com/articles/dataset/_/6149399)
Supplement: Supplementary file 2 [file 1]

**Table S1. Summary of two-dimensional QTL mapping.** <sup>1</sup> Square-root transformed sperm count (1x10<sup>6</sup>). <sup>2</sup> Support for the two-locus model over the null model, evidence for at least one QTL with allowance for interaction. <sup>3</sup> Support for the two-locus model over the single-locus model, allowing for interaction. <sup>4</sup> Support for the two-locus model over the additive model, evidence for interaction. <sup>5</sup> Support for the two-locus model over the null model, evidence for at least one QTL assuming no interaction. <sup>6</sup> Support for the two-locus model over the single-locus model.

|                                                                    | Locus 1 position (cM) |       | Locus 2 position (cM) |       | Full two-locus model <sup>2</sup> |         | Conditional-interactive model <sup>3</sup> |         | Interactive model <sup>4</sup> |         | Additive model <sup>5</sup> |         | Conditional-additive model <sup>6</sup> |         |
|--------------------------------------------------------------------|-----------------------|-------|-----------------------|-------|-----------------------------------|---------|--------------------------------------------|---------|--------------------------------|---------|-----------------------------|---------|-----------------------------------------|---------|
|                                                                    |                       |       |                       |       | LOD                               | P-value | LOD                                        | P-value | LOD                            | P-value | LOD                         | P-value | LOD                                     | P-value |
|                                                                    |                       |       |                       |       |                                   |         |                                            |         |                                |         |                             |         |                                         |         |
| <sup>1</sup> Normalized sperm count<br>Sperm head morphology index | 4                     | 41.23 | 9                     | 35.49 | 7.73                              | 0.001   | 4.54                                       | 0.109   | 1.16                           | 1       | 6.58                        | 0.001   | 3.38                                    | 0.025   |
|                                                                    | 1                     | 41.31 | 15                    | 23.15 | 7.18                              | 0.010   | 2.35                                       | 1       | 0.08                           | 1       | 7.09                        | 0.001   | 2.26                                    | 0.137   |
|                                                                    | 2                     | 76.42 | 4                     | 66.23 | 7.47                              | 0.009   | 4.19                                       | 0.197   | 2.05                           | 1       | 5.42                        | 0.022   | 2.14                                    | 0.186   |
|                                                                    | 2                     | 75.42 | 8                     | 45.26 | 6.3                               | 0.061   | 3.02                                       | 0.899   | 0.11                           | 1       | 6.19                        | 0.008   | 2.91                                    | 0.018   |
|                                                                    | 2                     | 82.42 | 9                     | 42.49 | 6.81                              | 0.023   | 2.93                                       | 0.937   | 0.43                           | 1       | 6.38                        | 0.005   | 2.5                                     | 0.062   |
|                                                                    | 2                     | 76.42 | 15                    | 23.15 | 8.83                              | < 0.001 | 4                                          | 0.276   | 0.08                           | 1       | 8.75                        | <0.001  | 3.92                                    | 0.001   |
|                                                                    | 4                     | 67.23 | 8                     | 45.26 | 6.56                              | 0.040   | 3.67                                       | 0.486   | 1.46                           | 1       | 5.09                        | 0.043   | 2.21                                    | 0.156   |
|                                                                    | 4                     | 67.23 | 9                     | 37.49 | 9.37                              | < 0.001 | 5.49                                       | 0.026   | 1.96                           | 1       | 7.41                        | 0.001   | 3.53                                    | 0.004   |
|                                                                    | 4                     | 67.23 | 15                    | 23.15 | 7.97                              | 0.005   | 3.14                                       | 0.842   | 0.33                           | 1       | 7.64                        | 0.001   | 2.81                                    | 0.025   |
|                                                                    | 7                     | 47.89 | 9                     | 42.49 | 6.43                              | 0.046   | 2.55                                       | 1       | 0.2                            | 1       | 6.23                        | 0.007   | 2.35                                    | 0.111   |
|                                                                    | 8                     | 45.26 | 9                     | 36.49 | 7.93                              | 0.005   | 4.05                                       | 0.253   | 0.01                           | 1       | 7.91                        | <0.001  | 4.04                                    | <0.001  |
|                                                                    | 8                     | 45.26 | 15                    | 23.15 | 7.82                              | 0.006   | 2.99                                       | 0.921   | 0.06                           | 1       | 7.76                        | <0.001  | 2.93                                    | 0.018   |
|                                                                    | 9                     | 32.49 | 15                    | 23.15 | 7.93                              | 0.005   | 3.1                                        | 0.864   | 0                              | 1       | 7.92                        | <0.001  | 3.09                                    | 0.012   |
