# Supplementary material
Source: publisher figshare collection journal article supplement (https://gsajournals.figshare.com/articles/dataset/_/6149399)
Supplement: Supplementary file 4 [file 1]

**Table S3. SNPs in gametic disequilibrium with Chr 4 introgressed TRD (130 – 150 Mb).**

| Chr | Position (bp)      | Chr 4 Position (bp)                | r <sup>2</sup>      |
|-----|--------------------|------------------------------------|---------------------|
| 3   | 140230049          | 135298806                          | 0.41                |
| 5   | 49635008           | 134414853 - 134757075              | 0.41                |
| 6   | 80040247, 99736989 | 134196085;<br>132582140, 134196085 | 0.45;<br>0.43, 0.55 |
| 13  | 47729550           | 134414853 - 135034426              | 0.4                 |
| 14  | 82588850           | 132582140, 134196085               | 0.42, 0.49          |
| 18  | 28789773           | 132582140, 134196085               | 0.41, 0.65          |
