# Supplementary material
Source: publisher figshare collection journal article supplement (https://gsajournals.figshare.com/articles/dataset/_/6149399)
Supplement: Supplementary file 5 [file 1]

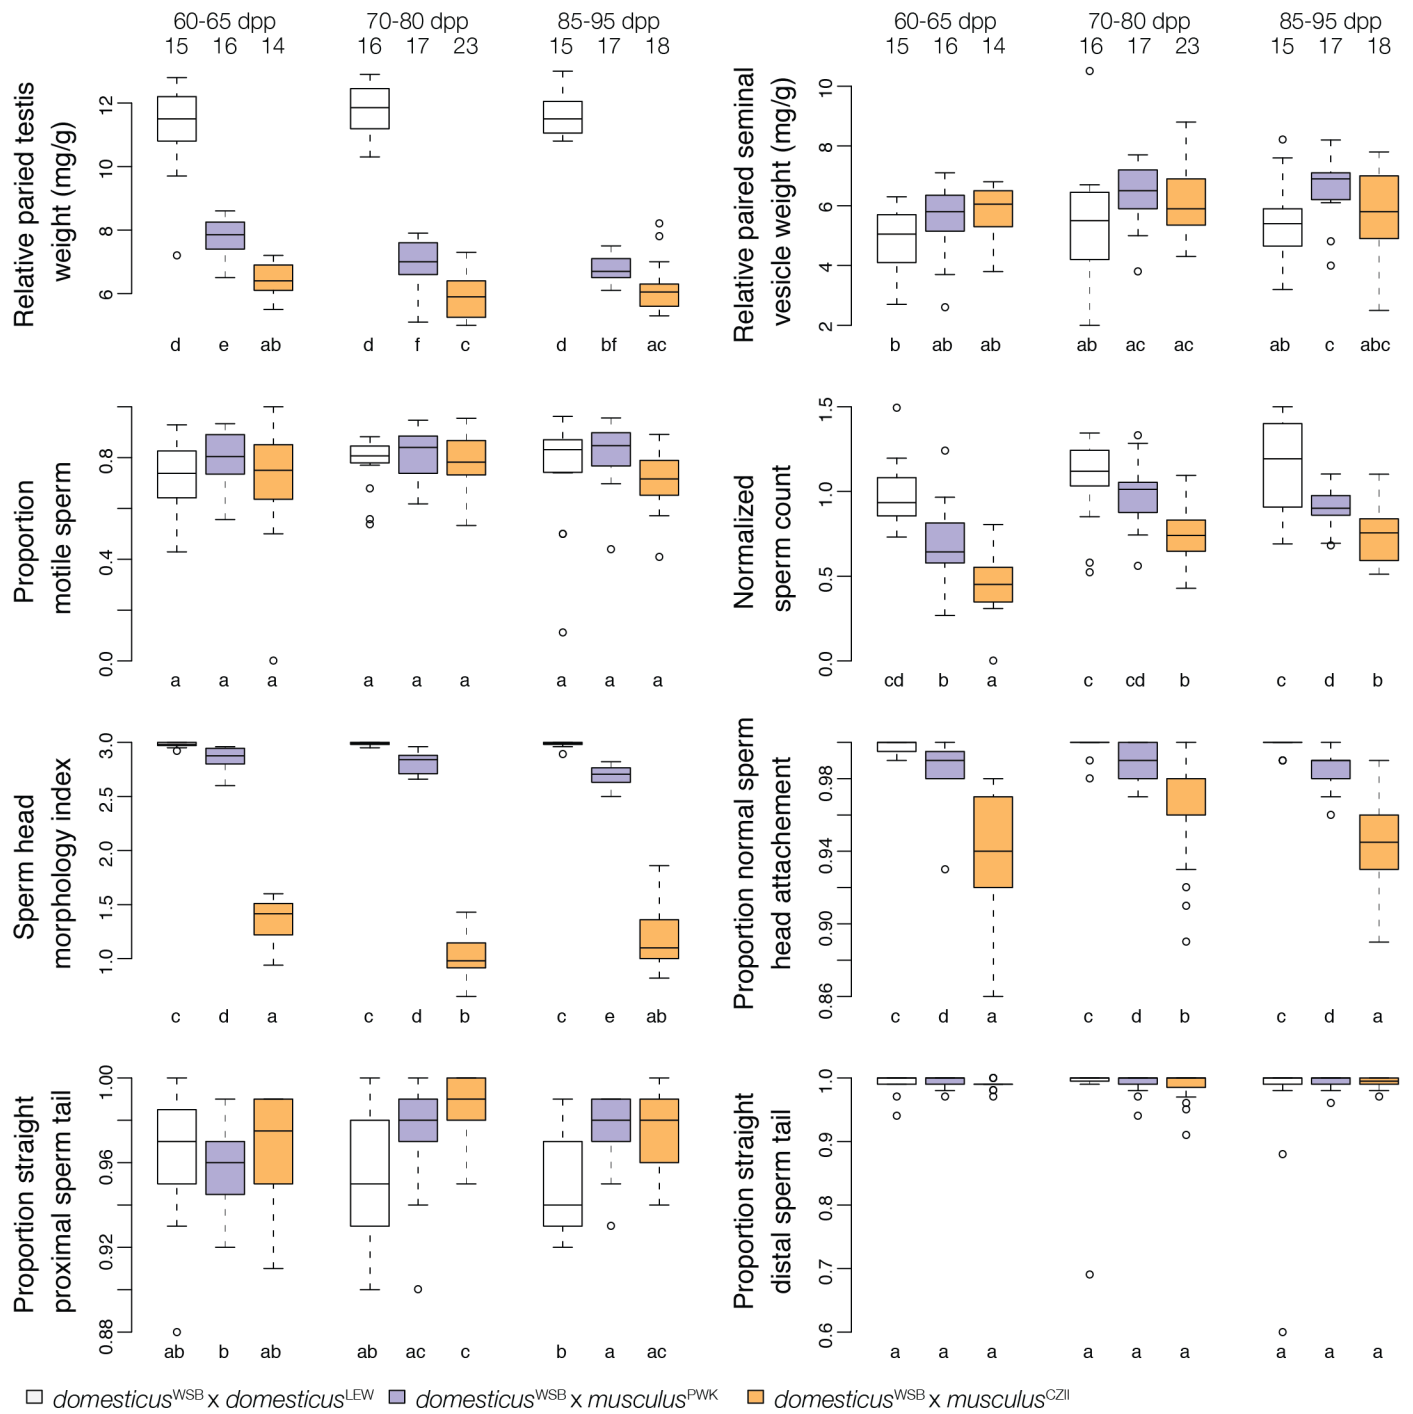

Figure S1. Reproductive phenotypes for young and aged F1 males. Relative paired testis weight and relative paired seminal vesicle weight are the weight of the paired tissues (mg) divided by body weight (g). Proportion of motile sperm was determined over a fixed area and observation time. Sperm numbers ( $1 \times 10^6$ ) were counted using heat shocked sperm suspension over a fixed area and sperm counts were normalized using a square root transformation. Sperm head morphology was evaluated on a scale of normal (3) to severely abnormal (0). Abnormal sperm tails could be bent at the base of the sperm head, have a loop in the proximal tail, or have twisted distal tail. Letters represent significant differences among groups (pairwise Wilcoxon test, FDR correct P-values). dpp = days post partum.
