# Supplementary material
Source: publisher figshare collection journal article supplement (https://gsajournals.figshare.com/articles/dataset/_/6149399)
Supplement: Supplementary file 6 [file 1]

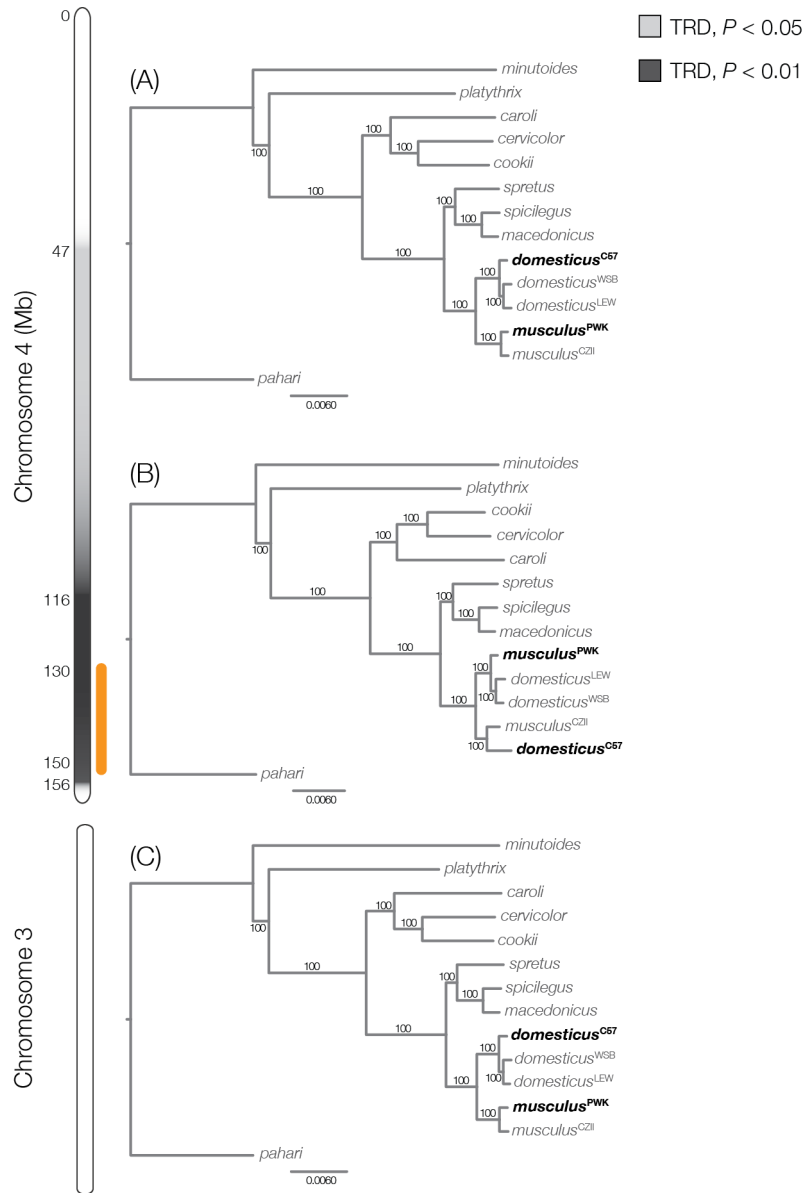

Figure S2. Phylogenetic discordance in the *Mus* phylogeny across Chr 4. *Mus* species tree, rooted on *M. pahari*, estimated using extended targets from Sarver et al. (2017) for Chr 4 (A) outside the introgressed TRD, (B) inside the introgressed TRD and (C) Chr 3. Branches are labeled with ML bootstrap support values. The color scale on Chr 4 indicates the extent of TRD across the chromosome. The tree estimated within the introgressed TRD is discordant with the trees estimated from outside the introgressed TRD and Chr 3 for inbred strains of *M. musculus*.
